# Supplementary material for: Spatially explicit multi-threat assessment of food tree species in Burkina Faso: A fine-scale approach
Source: PLoS One. 2017 Sep 7;12(9):e0184457. doi: 10.1371/journal.pone.0184457 (PMC5589249; doi:10.1371/journal.pone.0184457)
Supplement: S1 Dataset — (XLSX) [file pone.0184457.s001.xlsx]

## Sheet: Occurrences
Species	Long DD	Lat DD	DB Full Name	Citation	Notes
Acacia macrostachya	-4.133	11.55	AAU Herbarium Database	AAU Herbarium Database (access 04/2013) http://www.aubot.dk/search_form.php	freely available data from the Aarhus herbarium
Acacia macrostachya	-0.3	11.683	AAU Herbarium Database	AAU Herbarium Database (access 04/2013) http://www.aubot.dk/search_form.php	freely available data from the Aarhus herbarium
Acacia macrostachya	-0.35	11.7	AAU Herbarium Database	AAU Herbarium Database (access 04/2013) http://www.aubot.dk/search_form.php	freely available data from the Aarhus herbarium
Acacia macrostachya	-0.333	11.766	AAU Herbarium Database	AAU Herbarium Database (access 04/2013) http://www.aubot.dk/search_form.php	freely available data from the Aarhus herbarium
Acacia macrostachya	-4.44819	10.9608	Observation records Jonathan Heubes 2009	Jonathan Heubes (2012) Modelling the impact of future climate and land use change on vegetation patterns, plant diversity and provisioning ecosystem services in West Africa. PhD thesis, Goethe University Frankfurt	observation record
Acacia macrostachya	-4.44647	11.1853	Observation records Jonathan Heubes 2009	Jonathan Heubes (2012) Modelling the impact of future climate and land use change on vegetation patterns, plant diversity and provisioning ecosystem services in West Africa. PhD thesis, Goethe University Frankfurt	observation record
Acacia macrostachya	-4.44102	11.1933	Observation records Jonathan Heubes 2009	Jonathan Heubes (2012) Modelling the impact of future climate and land use change on vegetation patterns, plant diversity and provisioning ecosystem services in West Africa. PhD thesis, Goethe University Frankfurt	observation record
Acacia macrostachya	-4.44158	11.1945	Observation records Jonathan Heubes 2009	Jonathan Heubes (2012) Modelling the impact of future climate and land use change on vegetation patterns, plant diversity and provisioning ecosystem services in West Africa. PhD thesis, Goethe University Frankfurt	observation record
Acacia macrostachya	-1.85014	11.3222	Observation records Jonathan Heubes 2009	Jonathan Heubes (2012) Modelling the impact of future climate and land use change on vegetation patterns, plant diversity and provisioning ecosystem services in West Africa. PhD thesis, Goethe University Frankfurt	observation record
Acacia macrostachya	-1.82904	11.3308	Observation records Jonathan Heubes 2009	Jonathan Heubes (2012) Modelling the impact of future climate and land use change on vegetation patterns, plant diversity and provisioning ecosystem services in West Africa. PhD thesis, Goethe University Frankfurt	observation record
Acacia macrostachya	-1.77089	11.3639	Observation records Jonathan Heubes 2009	Jonathan Heubes (2012) Modelling the impact of future climate and land use change on vegetation patterns, plant diversity and provisioning ecosystem services in West Africa. PhD thesis, Goethe University Frankfurt	observation record
Acacia macrostachya	-1.83884	11.3906	Observation records Jonathan Heubes 2009	Jonathan Heubes (2012) Modelling the impact of future climate and land use change on vegetation patterns, plant diversity and provisioning ecosystem services in West Africa. PhD thesis, Goethe University Frankfurt	observation record
Acacia macrostachya	-4.1411	11.5612	Observation records Jonathan Heubes 2009	Jonathan Heubes (2012) Modelling the impact of future climate and land use change on vegetation patterns, plant diversity and provisioning ecosystem services in West Africa. PhD thesis, Goethe University Frankfurt	observation record
Acacia macrostachya	-4.13029	11.589	Observation records Jonathan Heubes 2009	Jonathan Heubes (2012) Modelling the impact of future climate and land use change on vegetation patterns, plant diversity and provisioning ecosystem services in West Africa. PhD thesis, Goethe University Frankfurt	observation record
Acacia macrostachya	-4.46174	11.6609	Observation records Jonathan Heubes 2009	Jonathan Heubes (2012) Modelling the impact of future climate and land use change on vegetation patterns, plant diversity and provisioning ecosystem services in West Africa. PhD thesis, Goethe University Frankfurt	observation record
Acacia macrostachya	-4.46101	11.6659	Observation records Jonathan Heubes 2009	Jonathan Heubes (2012) Modelling the impact of future climate and land use change on vegetation patterns, plant diversity and provisioning ecosystem services in West Africa. PhD thesis, Goethe University Frankfurt	observation record
Acacia macrostachya	-1.64248	11.6756	Observation records Jonathan Heubes 2009	Jonathan Heubes (2012) Modelling the impact of future climate and land use change on vegetation patterns, plant diversity and provisioning ecosystem services in West Africa. PhD thesis, Goethe University Frankfurt	observation record
Acacia macrostachya	-4.49554	11.7154	Observation records Jonathan Heubes 2009	Jonathan Heubes (2012) Modelling the impact of future climate and land use change on vegetation patterns, plant diversity and provisioning ecosystem services in West Africa. PhD thesis, Goethe University Frankfurt	observation record
Acacia macrostachya	-1.62342	11.7326	Observation records Jonathan Heubes 2009	Jonathan Heubes (2012) Modelling the impact of future climate and land use change on vegetation patterns, plant diversity and provisioning ecosystem services in West Africa. PhD thesis, Goethe University Frankfurt	observation record
Acacia macrostachya	-1.62322	11.7338	Observation records Jonathan Heubes 2009	Jonathan Heubes (2012) Modelling the impact of future climate and land use change on vegetation patterns, plant diversity and provisioning ecosystem services in West Africa. PhD thesis, Goethe University Frankfurt	observation record
Acacia macrostachya	-4.4826	11.7405	Observation records Jonathan Heubes 2009	Jonathan Heubes (2012) Modelling the impact of future climate and land use change on vegetation patterns, plant diversity and provisioning ecosystem services in West Africa. PhD thesis, Goethe University Frankfurt	observation record
Acacia macrostachya	-4.47472	11.749	Observation records Jonathan Heubes 2009	Jonathan Heubes (2012) Modelling the impact of future climate and land use change on vegetation patterns, plant diversity and provisioning ecosystem services in West Africa. PhD thesis, Goethe University Frankfurt	observation record
Acacia macrostachya	-1.61035	11.7556	Observation records Jonathan Heubes 2009	Jonathan Heubes (2012) Modelling the impact of future climate and land use change on vegetation patterns, plant diversity and provisioning ecosystem services in West Africa. PhD thesis, Goethe University Frankfurt	observation record
Acacia macrostachya	-1.25078	11.7565	Observation records Jonathan Heubes 2009	Jonathan Heubes (2012) Modelling the impact of future climate and land use change on vegetation patterns, plant diversity and provisioning ecosystem services in West Africa. PhD thesis, Goethe University Frankfurt	observation record
Acacia macrostachya	-1.60196	11.7789	Observation records Jonathan Heubes 2009	Jonathan Heubes (2012) Modelling the impact of future climate and land use change on vegetation patterns, plant diversity and provisioning ecosystem services in West Africa. PhD thesis, Goethe University Frankfurt	observation record
Acacia macrostachya	-3.73785	11.8705	Observation records Jonathan Heubes 2009	Jonathan Heubes (2012) Modelling the impact of future climate and land use change on vegetation patterns, plant diversity and provisioning ecosystem services in West Africa. PhD thesis, Goethe University Frankfurt	observation record
Acacia macrostachya	-3.74461	11.8735	Observation records Jonathan Heubes 2009	Jonathan Heubes (2012) Modelling the impact of future climate and land use change on vegetation patterns, plant diversity and provisioning ecosystem services in West Africa. PhD thesis, Goethe University Frankfurt	observation record
Acacia macrostachya	-1.27375	11.8759	Observation records Jonathan Heubes 2009	Jonathan Heubes (2012) Modelling the impact of future climate and land use change on vegetation patterns, plant diversity and provisioning ecosystem services in West Africa. PhD thesis, Goethe University Frankfurt	observation record
Acacia macrostachya	-0.37283	11.8991	Observation records Jonathan Heubes 2009	Jonathan Heubes (2012) Modelling the impact of future climate and land use change on vegetation patterns, plant diversity and provisioning ecosystem services in West Africa. PhD thesis, Goethe University Frankfurt	observation record
Acacia macrostachya	-3.60505	12.1771	Observation records Jonathan Heubes 2009	Jonathan Heubes (2012) Modelling the impact of future climate and land use change on vegetation patterns, plant diversity and provisioning ecosystem services in West Africa. PhD thesis, Goethe University Frankfurt	observation record
Acacia macrostachya	-0.98069	12.3297	Observation records Jonathan Heubes 2009	Jonathan Heubes (2012) Modelling the impact of future climate and land use change on vegetation patterns, plant diversity and provisioning ecosystem services in West Africa. PhD thesis, Goethe University Frankfurt	observation record
Acacia macrostachya	-1.16595	12.4409	Observation records Jonathan Heubes 2009	Jonathan Heubes (2012) Modelling the impact of future climate and land use change on vegetation patterns, plant diversity and provisioning ecosystem services in West Africa. PhD thesis, Goethe University Frankfurt	observation record
Acacia macrostachya	-1.23619	12.4834	Observation records Jonathan Heubes 2009	Jonathan Heubes (2012) Modelling the impact of future climate and land use change on vegetation patterns, plant diversity and provisioning ecosystem services in West Africa. PhD thesis, Goethe University Frankfurt	observation record
Acacia macrostachya	-3.25449	12.5157	Observation records Jonathan Heubes 2009	Jonathan Heubes (2012) Modelling the impact of future climate and land use change on vegetation patterns, plant diversity and provisioning ecosystem services in West Africa. PhD thesis, Goethe University Frankfurt	observation record
Acacia macrostachya	-3.26154	12.5328	Observation records Jonathan Heubes 2009	Jonathan Heubes (2012) Modelling the impact of future climate and land use change on vegetation patterns, plant diversity and provisioning ecosystem services in West Africa. PhD thesis, Goethe University Frankfurt	observation record
Acacia macrostachya	-3.47187	12.5612	Observation records Jonathan Heubes 2009	Jonathan Heubes (2012) Modelling the impact of future climate and land use change on vegetation patterns, plant diversity and provisioning ecosystem services in West Africa. PhD thesis, Goethe University Frankfurt	observation record
Acacia macrostachya	-1.50548	13.3043	Observation records Jonathan Heubes 2009	Jonathan Heubes (2012) Modelling the impact of future climate and land use change on vegetation patterns, plant diversity and provisioning ecosystem services in West Africa. PhD thesis, Goethe University Frankfurt	observation record
Acacia macrostachya	-0.47044	13.3706	Observation records Jonathan Heubes 2009	Jonathan Heubes (2012) Modelling the impact of future climate and land use change on vegetation patterns, plant diversity and provisioning ecosystem services in West Africa. PhD thesis, Goethe University Frankfurt	observation record
Acacia macrostachya	-1.56045	13.5185	Observation records Jonathan Heubes 2009	Jonathan Heubes (2012) Modelling the impact of future climate and land use change on vegetation patterns, plant diversity and provisioning ecosystem services in West Africa. PhD thesis, Goethe University Frankfurt	observation record
Acacia macrostachya	-2.21234	13.6798	Observation records Jonathan Heubes 2009	Jonathan Heubes (2012) Modelling the impact of future climate and land use change on vegetation patterns, plant diversity and provisioning ecosystem services in West Africa. PhD thesis, Goethe University Frankfurt	observation record
Acacia macrostachya	-1.573	13.7502	Observation records Jonathan Heubes 2009	Jonathan Heubes (2012) Modelling the impact of future climate and land use change on vegetation patterns, plant diversity and provisioning ecosystem services in West Africa. PhD thesis, Goethe University Frankfurt	observation record
Acacia macrostachya	-2.03367	13.838	Observation records Jonathan Heubes 2009	Jonathan Heubes (2012) Modelling the impact of future climate and land use change on vegetation patterns, plant diversity and provisioning ecosystem services in West Africa. PhD thesis, Goethe University Frankfurt	observation record
Acacia macrostachya	-1.92525	13.8867	Observation records Jonathan Heubes 2009	Jonathan Heubes (2012) Modelling the impact of future climate and land use change on vegetation patterns, plant diversity and provisioning ecosystem services in West Africa. PhD thesis, Goethe University Frankfurt	observation record
Acacia macrostachya	-1.84889	13.8951	Observation records Jonathan Heubes 2009	Jonathan Heubes (2012) Modelling the impact of future climate and land use change on vegetation patterns, plant diversity and provisioning ecosystem services in West Africa. PhD thesis, Goethe University Frankfurt	observation record
Acacia macrostachya	-3.26667	10.0833	SeSam - Senckenbergische Sammlungsdatenbanken (Herbarium Senckenbergianum)	Brandis, D., Menner, L., Allspach, A. and Türkay, M. 2007. The collection Management System SeSam of the Senckenberg Research Institute. Zoology 110: 161-162.	collection data
Acacia macrostachya	1.05	11.05	SeSam - Senckenbergische Sammlungsdatenbanken (Herbarium Senckenbergianum)	Brandis, D., Menner, L., Allspach, A. and Türkay, M. 2007. The collection Management System SeSam of the Senckenberg Research Institute. Zoology 110: 161-162.	collection data
Acacia macrostachya	-2.25389	11.4592	SeSam - Senckenbergische Sammlungsdatenbanken (Herbarium Senckenbergianum)	Brandis, D., Menner, L., Allspach, A. and Türkay, M. 2007. The collection Management System SeSam of the Senckenberg Research Institute. Zoology 110: 161-162.	collection data
Acacia macrostachya	-2.47239	11.5675	SeSam - Senckenbergische Sammlungsdatenbanken (Herbarium Senckenbergianum)	Brandis, D., Menner, L., Allspach, A. and Türkay, M. 2007. The collection Management System SeSam of the Senckenberg Research Institute. Zoology 110: 161-162.	collection data
Acacia macrostachya	-2.46635	11.5765	SeSam - Senckenbergische Sammlungsdatenbanken (Herbarium Senckenbergianum)	Brandis, D., Menner, L., Allspach, A. and Türkay, M. 2007. The collection Management System SeSam of the Senckenberg Research Institute. Zoology 110: 161-162.	collection data
Acacia macrostachya	2.31347	11.8842	SeSam - Senckenbergische Sammlungsdatenbanken (Herbarium Senckenbergianum)	Brandis, D., Menner, L., Allspach, A. and Türkay, M. 2007. The collection Management System SeSam of the Senckenberg Research Institute. Zoology 110: 161-162.	collection data
Acacia macrostachya	-0.316667	11.9	SeSam - Senckenbergische Sammlungsdatenbanken (Herbarium Senckenbergianum)	Brandis, D., Menner, L., Allspach, A. and Türkay, M. 2007. The collection Management System SeSam of the Senckenberg Research Institute. Zoology 110: 161-162.	collection data
Acacia macrostachya	1.96915	11.9964	SeSam - Senckenbergische Sammlungsdatenbanken (Herbarium Senckenbergianum)	Brandis, D., Menner, L., Allspach, A. and Türkay, M. 2007. The collection Management System SeSam of the Senckenberg Research Institute. Zoology 110: 161-162.	collection data
Acacia macrostachya	0.3025	12.0394	SeSam - Senckenbergische Sammlungsdatenbanken (Herbarium Senckenbergianum)	Brandis, D., Menner, L., Allspach, A. and Türkay, M. 2007. The collection Management System SeSam of the Senckenberg Research Institute. Zoology 110: 161-162.	collection data
Acacia macrostachya	0.35	12.0667	SeSam - Senckenbergische Sammlungsdatenbanken (Herbarium Senckenbergianum)	Brandis, D., Menner, L., Allspach, A. and Türkay, M. 2007. The collection Management System SeSam of the Senckenberg Research Institute. Zoology 110: 161-162.	collection data
Acacia macrostachya	1.8	12.15	SeSam - Senckenbergische Sammlungsdatenbanken (Herbarium Senckenbergianum)	Brandis, D., Menner, L., Allspach, A. and Türkay, M. 2007. The collection Management System SeSam of the Senckenberg Research Institute. Zoology 110: 161-162.	collection data
Acacia macrostachya	2.10528	13.5214	SeSam - Senckenbergische Sammlungsdatenbanken (Herbarium Senckenbergianum)	Brandis, D., Menner, L., Allspach, A. and Türkay, M. 2007. The collection Management System SeSam of the Senckenberg Research Institute. Zoology 110: 161-162.	collection data
Acacia macrostachya	-0.616667	15.0667	SeSam - Senckenbergische Sammlungsdatenbanken (Herbarium Senckenbergianum)	Brandis, D., Menner, L., Allspach, A. and Türkay, M. 2007. The collection Management System SeSam of the Senckenberg Research Institute. Zoology 110: 161-162.	collection data
Acacia macrostachya	-8.51639	8.14194	West African Vegetation Database - records of Herbarium Senckenbergianum	Schmidt M, Janßen T, Dressler S, Hahn K, Hien M, Konaté S, Lykke AM, Mahamane A, Sambou B, Sinsin B, Thiombiano A, Wittig R, Zizka G (2012) The West African Vegetation Database. Biodiversity and Ecology 4: 105-110.	observation data
Acacia macrostachya	-8.9	8.53333	West African Vegetation Database - records of Herbarium Senckenbergianum	Schmidt M, Janßen T, Dressler S, Hahn K, Hien M, Konaté S, Lykke AM, Mahamane A, Sambou B, Sinsin B, Thiombiano A, Wittig R, Zizka G (2012) The West African Vegetation Database. Biodiversity and Ecology 4: 105-110.	observation data
Acacia macrostachya	1.52513	10.0317	West African Vegetation Database - records of Herbarium Senckenbergianum	Schmidt M, Janßen T, Dressler S, Hahn K, Hien M, Konaté S, Lykke AM, Mahamane A, Sambou B, Sinsin B, Thiombiano A, Wittig R, Zizka G (2012) The West African Vegetation Database. Biodiversity and Ecology 4: 105-110.	observation data
Acacia macrostachya	1.51965	10.0319	West African Vegetation Database - records of Herbarium Senckenbergianum	Schmidt M, Janßen T, Dressler S, Hahn K, Hien M, Konaté S, Lykke AM, Mahamane A, Sambou B, Sinsin B, Thiombiano A, Wittig R, Zizka G (2012) The West African Vegetation Database. Biodiversity and Ecology 4: 105-110.	observation data
Acacia macrostachya	-5.40913	10.7584	West African Vegetation Database - records of Herbarium Senckenbergianum	Schmidt M, Janßen T, Dressler S, Hahn K, Hien M, Konaté S, Lykke AM, Mahamane A, Sambou B, Sinsin B, Thiombiano A, Wittig R, Zizka G (2012) The West African Vegetation Database. Biodiversity and Ecology 4: 105-110.	observation data
Acacia macrostachya	1.58941	11.0047	West African Vegetation Database - records of Herbarium Senckenbergianum	Schmidt M, Janßen T, Dressler S, Hahn K, Hien M, Konaté S, Lykke AM, Mahamane A, Sambou B, Sinsin B, Thiombiano A, Wittig R, Zizka G (2012) The West African Vegetation Database. Biodiversity and Ecology 4: 105-110.	observation data
Acacia macrostachya	0.7075	11.2497	West African Vegetation Database - records of Herbarium Senckenbergianum	Schmidt M, Janßen T, Dressler S, Hahn K, Hien M, Konaté S, Lykke AM, Mahamane A, Sambou B, Sinsin B, Thiombiano A, Wittig R, Zizka G (2012) The West African Vegetation Database. Biodiversity and Ecology 4: 105-110.	observation data
Acacia macrostachya	1.60893	11.3516	West African Vegetation Database - records of Herbarium Senckenbergianum	Schmidt M, Janßen T, Dressler S, Hahn K, Hien M, Konaté S, Lykke AM, Mahamane A, Sambou B, Sinsin B, Thiombiano A, Wittig R, Zizka G (2012) The West African Vegetation Database. Biodiversity and Ecology 4: 105-110.	observation data
Acacia macrostachya	1.56426	11.4561	West African Vegetation Database - records of Herbarium Senckenbergianum	Schmidt M, Janßen T, Dressler S, Hahn K, Hien M, Konaté S, Lykke AM, Mahamane A, Sambou B, Sinsin B, Thiombiano A, Wittig R, Zizka G (2012) The West African Vegetation Database. Biodiversity and Ecology 4: 105-110.	observation data
Acacia macrostachya	-4.48162	11.5133	West African Vegetation Database - records of Herbarium Senckenbergianum	Schmidt M, Janßen T, Dressler S, Hahn K, Hien M, Konaté S, Lykke AM, Mahamane A, Sambou B, Sinsin B, Thiombiano A, Wittig R, Zizka G (2012) The West African Vegetation Database. Biodiversity and Ecology 4: 105-110.	observation data
Acacia macrostachya	2.47428	11.5509	West African Vegetation Database - records of Herbarium Senckenbergianum	Schmidt M, Janßen T, Dressler S, Hahn K, Hien M, Konaté S, Lykke AM, Mahamane A, Sambou B, Sinsin B, Thiombiano A, Wittig R, Zizka G (2012) The West African Vegetation Database. Biodiversity and Ecology 4: 105-110.	observation data
Acacia macrostachya	2.47439	11.5512	West African Vegetation Database - records of Herbarium Senckenbergianum	Schmidt M, Janßen T, Dressler S, Hahn K, Hien M, Konaté S, Lykke AM, Mahamane A, Sambou B, Sinsin B, Thiombiano A, Wittig R, Zizka G (2012) The West African Vegetation Database. Biodiversity and Ecology 4: 105-110.	observation data
Acacia macrostachya	2.47372	11.5692	West African Vegetation Database - records of Herbarium Senckenbergianum	Schmidt M, Janßen T, Dressler S, Hahn K, Hien M, Konaté S, Lykke AM, Mahamane A, Sambou B, Sinsin B, Thiombiano A, Wittig R, Zizka G (2012) The West African Vegetation Database. Biodiversity and Ecology 4: 105-110.	observation data
Acacia macrostachya	1.45639	11.5704	West African Vegetation Database - records of Herbarium Senckenbergianum	Schmidt M, Janßen T, Dressler S, Hahn K, Hien M, Konaté S, Lykke AM, Mahamane A, Sambou B, Sinsin B, Thiombiano A, Wittig R, Zizka G (2012) The West African Vegetation Database. Biodiversity and Ecology 4: 105-110.	observation data
Acacia macrostachya	2.48328	11.5757	West African Vegetation Database - records of Herbarium Senckenbergianum	Schmidt M, Janßen T, Dressler S, Hahn K, Hien M, Konaté S, Lykke AM, Mahamane A, Sambou B, Sinsin B, Thiombiano A, Wittig R, Zizka G (2012) The West African Vegetation Database. Biodiversity and Ecology 4: 105-110.	observation data
Acacia macrostachya	2.46192	11.5803	West African Vegetation Database - records of Herbarium Senckenbergianum	Schmidt M, Janßen T, Dressler S, Hahn K, Hien M, Konaté S, Lykke AM, Mahamane A, Sambou B, Sinsin B, Thiombiano A, Wittig R, Zizka G (2012) The West African Vegetation Database. Biodiversity and Ecology 4: 105-110.	observation data
Acacia macrostachya	2.462	11.5803	West African Vegetation Database - records of Herbarium Senckenbergianum	Schmidt M, Janßen T, Dressler S, Hahn K, Hien M, Konaté S, Lykke AM, Mahamane A, Sambou B, Sinsin B, Thiombiano A, Wittig R, Zizka G (2012) The West African Vegetation Database. Biodiversity and Ecology 4: 105-110.	observation data
Acacia macrostachya	2.46042	11.5818	West African Vegetation Database - records of Herbarium Senckenbergianum	Schmidt M, Janßen T, Dressler S, Hahn K, Hien M, Konaté S, Lykke AM, Mahamane A, Sambou B, Sinsin B, Thiombiano A, Wittig R, Zizka G (2012) The West African Vegetation Database. Biodiversity and Ecology 4: 105-110.	observation data
Acacia macrostachya	2.4585	11.5831	West African Vegetation Database - records of Herbarium Senckenbergianum	Schmidt M, Janßen T, Dressler S, Hahn K, Hien M, Konaté S, Lykke AM, Mahamane A, Sambou B, Sinsin B, Thiombiano A, Wittig R, Zizka G (2012) The West African Vegetation Database. Biodiversity and Ecology 4: 105-110.	observation data
Acacia macrostachya	2.45836	11.5835	West African Vegetation Database - records of Herbarium Senckenbergianum	Schmidt M, Janßen T, Dressler S, Hahn K, Hien M, Konaté S, Lykke AM, Mahamane A, Sambou B, Sinsin B, Thiombiano A, Wittig R, Zizka G (2012) The West African Vegetation Database. Biodiversity and Ecology 4: 105-110.	observation data
Acacia macrostachya	2.52167	11.6093	West African Vegetation Database - records of Herbarium Senckenbergianum	Schmidt M, Janßen T, Dressler S, Hahn K, Hien M, Konaté S, Lykke AM, Mahamane A, Sambou B, Sinsin B, Thiombiano A, Wittig R, Zizka G (2012) The West African Vegetation Database. Biodiversity and Ecology 4: 105-110.	observation data
Acacia macrostachya	2.43286	11.6226	West African Vegetation Database - records of Herbarium Senckenbergianum	Schmidt M, Janßen T, Dressler S, Hahn K, Hien M, Konaté S, Lykke AM, Mahamane A, Sambou B, Sinsin B, Thiombiano A, Wittig R, Zizka G (2012) The West African Vegetation Database. Biodiversity and Ecology 4: 105-110.	observation data
Acacia macrostachya	2.43225	11.6236	West African Vegetation Database - records of Herbarium Senckenbergianum	Schmidt M, Janßen T, Dressler S, Hahn K, Hien M, Konaté S, Lykke AM, Mahamane A, Sambou B, Sinsin B, Thiombiano A, Wittig R, Zizka G (2012) The West African Vegetation Database. Biodiversity and Ecology 4: 105-110.	observation data
Acacia macrostachya	2.432	11.6237	West African Vegetation Database - records of Herbarium Senckenbergianum	Schmidt M, Janßen T, Dressler S, Hahn K, Hien M, Konaté S, Lykke AM, Mahamane A, Sambou B, Sinsin B, Thiombiano A, Wittig R, Zizka G (2012) The West African Vegetation Database. Biodiversity and Ecology 4: 105-110.	observation data
Acacia macrostachya	2.43764	11.6392	West African Vegetation Database - records of Herbarium Senckenbergianum	Schmidt M, Janßen T, Dressler S, Hahn K, Hien M, Konaté S, Lykke AM, Mahamane A, Sambou B, Sinsin B, Thiombiano A, Wittig R, Zizka G (2012) The West African Vegetation Database. Biodiversity and Ecology 4: 105-110.	observation data
Acacia macrostachya	2.43764	11.6407	West African Vegetation Database - records of Herbarium Senckenbergianum	Schmidt M, Janßen T, Dressler S, Hahn K, Hien M, Konaté S, Lykke AM, Mahamane A, Sambou B, Sinsin B, Thiombiano A, Wittig R, Zizka G (2012) The West African Vegetation Database. Biodiversity and Ecology 4: 105-110.	observation data
Acacia macrostachya	2.43533	11.642	West African Vegetation Database - records of Herbarium Senckenbergianum	Schmidt M, Janßen T, Dressler S, Hahn K, Hien M, Konaté S, Lykke AM, Mahamane A, Sambou B, Sinsin B, Thiombiano A, Wittig R, Zizka G (2012) The West African Vegetation Database. Biodiversity and Ecology 4: 105-110.	observation data
Acacia macrostachya	2.45031	11.6422	West African Vegetation Database - records of Herbarium Senckenbergianum	Schmidt M, Janßen T, Dressler S, Hahn K, Hien M, Konaté S, Lykke AM, Mahamane A, Sambou B, Sinsin B, Thiombiano A, Wittig R, Zizka G (2012) The West African Vegetation Database. Biodiversity and Ecology 4: 105-110.	observation data
Acacia macrostachya	0.51932	11.6429	West African Vegetation Database - records of Herbarium Senckenbergianum	Schmidt M, Janßen T, Dressler S, Hahn K, Hien M, Konaté S, Lykke AM, Mahamane A, Sambou B, Sinsin B, Thiombiano A, Wittig R, Zizka G (2012) The West African Vegetation Database. Biodiversity and Ecology 4: 105-110.	observation data
Acacia macrostachya	2.39242	11.643	West African Vegetation Database - records of Herbarium Senckenbergianum	Schmidt M, Janßen T, Dressler S, Hahn K, Hien M, Konaté S, Lykke AM, Mahamane A, Sambou B, Sinsin B, Thiombiano A, Wittig R, Zizka G (2012) The West African Vegetation Database. Biodiversity and Ecology 4: 105-110.	observation data
Acacia macrostachya	2.39247	11.6432	West African Vegetation Database - records of Herbarium Senckenbergianum	Schmidt M, Janßen T, Dressler S, Hahn K, Hien M, Konaté S, Lykke AM, Mahamane A, Sambou B, Sinsin B, Thiombiano A, Wittig R, Zizka G (2012) The West African Vegetation Database. Biodiversity and Ecology 4: 105-110.	observation data
Acacia macrostachya	2.43944	11.6464	West African Vegetation Database - records of Herbarium Senckenbergianum	Schmidt M, Janßen T, Dressler S, Hahn K, Hien M, Konaté S, Lykke AM, Mahamane A, Sambou B, Sinsin B, Thiombiano A, Wittig R, Zizka G (2012) The West African Vegetation Database. Biodiversity and Ecology 4: 105-110.	observation data
Acacia macrostachya	2.43742	11.6473	West African Vegetation Database - records of Herbarium Senckenbergianum	Schmidt M, Janßen T, Dressler S, Hahn K, Hien M, Konaté S, Lykke AM, Mahamane A, Sambou B, Sinsin B, Thiombiano A, Wittig R, Zizka G (2012) The West African Vegetation Database. Biodiversity and Ecology 4: 105-110.	observation data
Acacia macrostachya	2.394	11.6484	West African Vegetation Database - records of Herbarium Senckenbergianum	Schmidt M, Janßen T, Dressler S, Hahn K, Hien M, Konaté S, Lykke AM, Mahamane A, Sambou B, Sinsin B, Thiombiano A, Wittig R, Zizka G (2012) The West African Vegetation Database. Biodiversity and Ecology 4: 105-110.	observation data
Acacia macrostachya	2.39403	11.6486	West African Vegetation Database - records of Herbarium Senckenbergianum	Schmidt M, Janßen T, Dressler S, Hahn K, Hien M, Konaté S, Lykke AM, Mahamane A, Sambou B, Sinsin B, Thiombiano A, Wittig R, Zizka G (2012) The West African Vegetation Database. Biodiversity and Ecology 4: 105-110.	observation data
Acacia macrostachya	2.39403	11.6488	West African Vegetation Database - records of Herbarium Senckenbergianum	Schmidt M, Janßen T, Dressler S, Hahn K, Hien M, Konaté S, Lykke AM, Mahamane A, Sambou B, Sinsin B, Thiombiano A, Wittig R, Zizka G (2012) The West African Vegetation Database. Biodiversity and Ecology 4: 105-110.	observation data
Acacia macrostachya	2.43892	11.6489	West African Vegetation Database - records of Herbarium Senckenbergianum	Schmidt M, Janßen T, Dressler S, Hahn K, Hien M, Konaté S, Lykke AM, Mahamane A, Sambou B, Sinsin B, Thiombiano A, Wittig R, Zizka G (2012) The West African Vegetation Database. Biodiversity and Ecology 4: 105-110.	observation data
Acacia macrostachya	2.43872	11.6491	West African Vegetation Database - records of Herbarium Senckenbergianum	Schmidt M, Janßen T, Dressler S, Hahn K, Hien M, Konaté S, Lykke AM, Mahamane A, Sambou B, Sinsin B, Thiombiano A, Wittig R, Zizka G (2012) The West African Vegetation Database. Biodiversity and Ecology 4: 105-110.	observation data
Acacia macrostachya	2.45133	11.6559	West African Vegetation Database - records of Herbarium Senckenbergianum	Schmidt M, Janßen T, Dressler S, Hahn K, Hien M, Konaté S, Lykke AM, Mahamane A, Sambou B, Sinsin B, Thiombiano A, Wittig R, Zizka G (2012) The West African Vegetation Database. Biodiversity and Ecology 4: 105-110.	observation data
Acacia macrostachya	2.447	11.6622	West African Vegetation Database - records of Herbarium Senckenbergianum	Schmidt M, Janßen T, Dressler S, Hahn K, Hien M, Konaté S, Lykke AM, Mahamane A, Sambou B, Sinsin B, Thiombiano A, Wittig R, Zizka G (2012) The West African Vegetation Database. Biodiversity and Ecology 4: 105-110.	observation data
Acacia macrostachya	-4.46152	11.6676	West African Vegetation Database - records of Herbarium Senckenbergianum	Schmidt M, Janßen T, Dressler S, Hahn K, Hien M, Konaté S, Lykke AM, Mahamane A, Sambou B, Sinsin B, Thiombiano A, Wittig R, Zizka G (2012) The West African Vegetation Database. Biodiversity and Ecology 4: 105-110.	observation data
Acacia macrostachya	2.43964	11.6727	West African Vegetation Database - records of Herbarium Senckenbergianum	Schmidt M, Janßen T, Dressler S, Hahn K, Hien M, Konaté S, Lykke AM, Mahamane A, Sambou B, Sinsin B, Thiombiano A, Wittig R, Zizka G (2012) The West African Vegetation Database. Biodiversity and Ecology 4: 105-110.	observation data
Acacia macrostachya	2.54375	11.6823	West African Vegetation Database - records of Herbarium Senckenbergianum	Schmidt M, Janßen T, Dressler S, Hahn K, Hien M, Konaté S, Lykke AM, Mahamane A, Sambou B, Sinsin B, Thiombiano A, Wittig R, Zizka G (2012) The West African Vegetation Database. Biodiversity and Ecology 4: 105-110.	observation data
Acacia macrostachya	2.56372	11.7272	West African Vegetation Database - records of Herbarium Senckenbergianum	Schmidt M, Janßen T, Dressler S, Hahn K, Hien M, Konaté S, Lykke AM, Mahamane A, Sambou B, Sinsin B, Thiombiano A, Wittig R, Zizka G (2012) The West African Vegetation Database. Biodiversity and Ecology 4: 105-110.	observation data
Acacia macrostachya	1.74983	11.7913	West African Vegetation Database - records of Herbarium Senckenbergianum	Schmidt M, Janßen T, Dressler S, Hahn K, Hien M, Konaté S, Lykke AM, Mahamane A, Sambou B, Sinsin B, Thiombiano A, Wittig R, Zizka G (2012) The West African Vegetation Database. Biodiversity and Ecology 4: 105-110.	observation data
Acacia macrostachya	-3.73629	11.87	West African Vegetation Database - records of Herbarium Senckenbergianum	Schmidt M, Janßen T, Dressler S, Hahn K, Hien M, Konaté S, Lykke AM, Mahamane A, Sambou B, Sinsin B, Thiombiano A, Wittig R, Zizka G (2012) The West African Vegetation Database. Biodiversity and Ecology 4: 105-110.	observation data
Acacia macrostachya	0.37442	11.8734	West African Vegetation Database - records of Herbarium Senckenbergianum	Schmidt M, Janßen T, Dressler S, Hahn K, Hien M, Konaté S, Lykke AM, Mahamane A, Sambou B, Sinsin B, Thiombiano A, Wittig R, Zizka G (2012) The West African Vegetation Database. Biodiversity and Ecology 4: 105-110.	observation data
Acacia macrostachya	2.31347	11.8842	West African Vegetation Database - records of Herbarium Senckenbergianum	Schmidt M, Janßen T, Dressler S, Hahn K, Hien M, Konaté S, Lykke AM, Mahamane A, Sambou B, Sinsin B, Thiombiano A, Wittig R, Zizka G (2012) The West African Vegetation Database. Biodiversity and Ecology 4: 105-110.	observation data
Acacia macrostachya	0.392917	11.8857	West African Vegetation Database - records of Herbarium Senckenbergianum	Schmidt M, Janßen T, Dressler S, Hahn K, Hien M, Konaté S, Lykke AM, Mahamane A, Sambou B, Sinsin B, Thiombiano A, Wittig R, Zizka G (2012) The West African Vegetation Database. Biodiversity and Ecology 4: 105-110.	observation data
Acacia macrostachya	2.36158	11.9188	West African Vegetation Database - records of Herbarium Senckenbergianum	Schmidt M, Janßen T, Dressler S, Hahn K, Hien M, Konaté S, Lykke AM, Mahamane A, Sambou B, Sinsin B, Thiombiano A, Wittig R, Zizka G (2012) The West African Vegetation Database. Biodiversity and Ecology 4: 105-110.	observation data
Acacia macrostachya	0.3983	11.9367	West African Vegetation Database - records of Herbarium Senckenbergianum	Schmidt M, Janßen T, Dressler S, Hahn K, Hien M, Konaté S, Lykke AM, Mahamane A, Sambou B, Sinsin B, Thiombiano A, Wittig R, Zizka G (2012) The West African Vegetation Database. Biodiversity and Ecology 4: 105-110.	observation data
Acacia macrostachya	2.01055	11.9392	West African Vegetation Database - records of Herbarium Senckenbergianum	Schmidt M, Janßen T, Dressler S, Hahn K, Hien M, Konaté S, Lykke AM, Mahamane A, Sambou B, Sinsin B, Thiombiano A, Wittig R, Zizka G (2012) The West African Vegetation Database. Biodiversity and Ecology 4: 105-110.	observation data
Acacia macrostachya	1.9225	11.9537	West African Vegetation Database - records of Herbarium Senckenbergianum	Schmidt M, Janßen T, Dressler S, Hahn K, Hien M, Konaté S, Lykke AM, Mahamane A, Sambou B, Sinsin B, Thiombiano A, Wittig R, Zizka G (2012) The West African Vegetation Database. Biodiversity and Ecology 4: 105-110.	observation data
Acacia macrostachya	1.92639	11.9538	West African Vegetation Database - records of Herbarium Senckenbergianum	Schmidt M, Janßen T, Dressler S, Hahn K, Hien M, Konaté S, Lykke AM, Mahamane A, Sambou B, Sinsin B, Thiombiano A, Wittig R, Zizka G (2012) The West African Vegetation Database. Biodiversity and Ecology 4: 105-110.	observation data
Acacia macrostachya	1.92355	11.9541	West African Vegetation Database - records of Herbarium Senckenbergianum	Schmidt M, Janßen T, Dressler S, Hahn K, Hien M, Konaté S, Lykke AM, Mahamane A, Sambou B, Sinsin B, Thiombiano A, Wittig R, Zizka G (2012) The West African Vegetation Database. Biodiversity and Ecology 4: 105-110.	observation data
Acacia macrostachya	1.96121	11.9579	West African Vegetation Database - records of Herbarium Senckenbergianum	Schmidt M, Janßen T, Dressler S, Hahn K, Hien M, Konaté S, Lykke AM, Mahamane A, Sambou B, Sinsin B, Thiombiano A, Wittig R, Zizka G (2012) The West African Vegetation Database. Biodiversity and Ecology 4: 105-110.	observation data
Acacia macrostachya	1.96075	11.9585	West African Vegetation Database - records of Herbarium Senckenbergianum	Schmidt M, Janßen T, Dressler S, Hahn K, Hien M, Konaté S, Lykke AM, Mahamane A, Sambou B, Sinsin B, Thiombiano A, Wittig R, Zizka G (2012) The West African Vegetation Database. Biodiversity and Ecology 4: 105-110.	observation data
Acacia macrostachya	1.95955	11.9605	West African Vegetation Database - records of Herbarium Senckenbergianum	Schmidt M, Janßen T, Dressler S, Hahn K, Hien M, Konaté S, Lykke AM, Mahamane A, Sambou B, Sinsin B, Thiombiano A, Wittig R, Zizka G (2012) The West African Vegetation Database. Biodiversity and Ecology 4: 105-110.	observation data
Acacia macrostachya	1.95823	11.9615	West African Vegetation Database - records of Herbarium Senckenbergianum	Schmidt M, Janßen T, Dressler S, Hahn K, Hien M, Konaté S, Lykke AM, Mahamane A, Sambou B, Sinsin B, Thiombiano A, Wittig R, Zizka G (2012) The West African Vegetation Database. Biodiversity and Ecology 4: 105-110.	observation data
Acacia macrostachya	1.95771	11.9617	West African Vegetation Database - records of Herbarium Senckenbergianum	Schmidt M, Janßen T, Dressler S, Hahn K, Hien M, Konaté S, Lykke AM, Mahamane A, Sambou B, Sinsin B, Thiombiano A, Wittig R, Zizka G (2012) The West African Vegetation Database. Biodiversity and Ecology 4: 105-110.	observation data
Acacia macrostachya	1.95671	11.9617	West African Vegetation Database - records of Herbarium Senckenbergianum	Schmidt M, Janßen T, Dressler S, Hahn K, Hien M, Konaté S, Lykke AM, Mahamane A, Sambou B, Sinsin B, Thiombiano A, Wittig R, Zizka G (2012) The West African Vegetation Database. Biodiversity and Ecology 4: 105-110.	observation data
Acacia macrostachya	0.3587	11.9719	West African Vegetation Database - records of Herbarium Senckenbergianum	Schmidt M, Janßen T, Dressler S, Hahn K, Hien M, Konaté S, Lykke AM, Mahamane A, Sambou B, Sinsin B, Thiombiano A, Wittig R, Zizka G (2012) The West African Vegetation Database. Biodiversity and Ecology 4: 105-110.	observation data
Acacia macrostachya	1.82714	11.9828	West African Vegetation Database - records of Herbarium Senckenbergianum	Schmidt M, Janßen T, Dressler S, Hahn K, Hien M, Konaté S, Lykke AM, Mahamane A, Sambou B, Sinsin B, Thiombiano A, Wittig R, Zizka G (2012) The West African Vegetation Database. Biodiversity and Ecology 4: 105-110.	observation data
Acacia macrostachya	2.0205	11.9911	West African Vegetation Database - records of Herbarium Senckenbergianum	Schmidt M, Janßen T, Dressler S, Hahn K, Hien M, Konaté S, Lykke AM, Mahamane A, Sambou B, Sinsin B, Thiombiano A, Wittig R, Zizka G (2012) The West African Vegetation Database. Biodiversity and Ecology 4: 105-110.	observation data
Acacia macrostachya	2.02065	11.9926	West African Vegetation Database - records of Herbarium Senckenbergianum	Schmidt M, Janßen T, Dressler S, Hahn K, Hien M, Konaté S, Lykke AM, Mahamane A, Sambou B, Sinsin B, Thiombiano A, Wittig R, Zizka G (2012) The West African Vegetation Database. Biodiversity and Ecology 4: 105-110.	observation data
Acacia macrostachya	2.02205	11.9927	West African Vegetation Database - records of Herbarium Senckenbergianum	Schmidt M, Janßen T, Dressler S, Hahn K, Hien M, Konaté S, Lykke AM, Mahamane A, Sambou B, Sinsin B, Thiombiano A, Wittig R, Zizka G (2012) The West African Vegetation Database. Biodiversity and Ecology 4: 105-110.	observation data
Acacia macrostachya	1.97022	11.9941	West African Vegetation Database - records of Herbarium Senckenbergianum	Schmidt M, Janßen T, Dressler S, Hahn K, Hien M, Konaté S, Lykke AM, Mahamane A, Sambou B, Sinsin B, Thiombiano A, Wittig R, Zizka G (2012) The West African Vegetation Database. Biodiversity and Ecology 4: 105-110.	observation data
Acacia macrostachya	1.96677	11.9947	West African Vegetation Database - records of Herbarium Senckenbergianum	Schmidt M, Janßen T, Dressler S, Hahn K, Hien M, Konaté S, Lykke AM, Mahamane A, Sambou B, Sinsin B, Thiombiano A, Wittig R, Zizka G (2012) The West African Vegetation Database. Biodiversity and Ecology 4: 105-110.	observation data
Acacia macrostachya	1.96916	11.9964	West African Vegetation Database - records of Herbarium Senckenbergianum	Schmidt M, Janßen T, Dressler S, Hahn K, Hien M, Konaté S, Lykke AM, Mahamane A, Sambou B, Sinsin B, Thiombiano A, Wittig R, Zizka G (2012) The West African Vegetation Database. Biodiversity and Ecology 4: 105-110.	observation data
Acacia macrostachya	1.9777	11.997	West African Vegetation Database - records of Herbarium Senckenbergianum	Schmidt M, Janßen T, Dressler S, Hahn K, Hien M, Konaté S, Lykke AM, Mahamane A, Sambou B, Sinsin B, Thiombiano A, Wittig R, Zizka G (2012) The West African Vegetation Database. Biodiversity and Ecology 4: 105-110.	observation data
Acacia macrostachya	1.97689	11.9977	West African Vegetation Database - records of Herbarium Senckenbergianum	Schmidt M, Janßen T, Dressler S, Hahn K, Hien M, Konaté S, Lykke AM, Mahamane A, Sambou B, Sinsin B, Thiombiano A, Wittig R, Zizka G (2012) The West African Vegetation Database. Biodiversity and Ecology 4: 105-110.	observation data
Acacia macrostachya	1.97642	11.998	West African Vegetation Database - records of Herbarium Senckenbergianum	Schmidt M, Janßen T, Dressler S, Hahn K, Hien M, Konaté S, Lykke AM, Mahamane A, Sambou B, Sinsin B, Thiombiano A, Wittig R, Zizka G (2012) The West African Vegetation Database. Biodiversity and Ecology 4: 105-110.	observation data
Acacia macrostachya	1.97504	11.998	West African Vegetation Database - records of Herbarium Senckenbergianum	Schmidt M, Janßen T, Dressler S, Hahn K, Hien M, Konaté S, Lykke AM, Mahamane A, Sambou B, Sinsin B, Thiombiano A, Wittig R, Zizka G (2012) The West African Vegetation Database. Biodiversity and Ecology 4: 105-110.	observation data
Acacia macrostachya	1.97542	11.9983	West African Vegetation Database - records of Herbarium Senckenbergianum	Schmidt M, Janßen T, Dressler S, Hahn K, Hien M, Konaté S, Lykke AM, Mahamane A, Sambou B, Sinsin B, Thiombiano A, Wittig R, Zizka G (2012) The West African Vegetation Database. Biodiversity and Ecology 4: 105-110.	observation data
Acacia macrostachya	1.93132	12.011	West African Vegetation Database - records of Herbarium Senckenbergianum	Schmidt M, Janßen T, Dressler S, Hahn K, Hien M, Konaté S, Lykke AM, Mahamane A, Sambou B, Sinsin B, Thiombiano A, Wittig R, Zizka G (2012) The West African Vegetation Database. Biodiversity and Ecology 4: 105-110.	observation data
Acacia macrostachya	1.93121	12.0127	West African Vegetation Database - records of Herbarium Senckenbergianum	Schmidt M, Janßen T, Dressler S, Hahn K, Hien M, Konaté S, Lykke AM, Mahamane A, Sambou B, Sinsin B, Thiombiano A, Wittig R, Zizka G (2012) The West African Vegetation Database. Biodiversity and Ecology 4: 105-110.	observation data
Acacia macrostachya	0.290117	12.0185	West African Vegetation Database - records of Herbarium Senckenbergianum	Schmidt M, Janßen T, Dressler S, Hahn K, Hien M, Konaté S, Lykke AM, Mahamane A, Sambou B, Sinsin B, Thiombiano A, Wittig R, Zizka G (2012) The West African Vegetation Database. Biodiversity and Ecology 4: 105-110.	observation data
Acacia macrostachya	0.301217	12.0199	West African Vegetation Database - records of Herbarium Senckenbergianum	Schmidt M, Janßen T, Dressler S, Hahn K, Hien M, Konaté S, Lykke AM, Mahamane A, Sambou B, Sinsin B, Thiombiano A, Wittig R, Zizka G (2012) The West African Vegetation Database. Biodiversity and Ecology 4: 105-110.	observation data
Acacia macrostachya	0.3024	12.0205	West African Vegetation Database - records of Herbarium Senckenbergianum	Schmidt M, Janßen T, Dressler S, Hahn K, Hien M, Konaté S, Lykke AM, Mahamane A, Sambou B, Sinsin B, Thiombiano A, Wittig R, Zizka G (2012) The West African Vegetation Database. Biodiversity and Ecology 4: 105-110.	observation data
Acacia macrostachya	2.04338	12.0274	West African Vegetation Database - records of Herbarium Senckenbergianum	Schmidt M, Janßen T, Dressler S, Hahn K, Hien M, Konaté S, Lykke AM, Mahamane A, Sambou B, Sinsin B, Thiombiano A, Wittig R, Zizka G (2012) The West African Vegetation Database. Biodiversity and Ecology 4: 105-110.	observation data
Acacia macrostachya	1.78878	12.0337	West African Vegetation Database - records of Herbarium Senckenbergianum	Schmidt M, Janßen T, Dressler S, Hahn K, Hien M, Konaté S, Lykke AM, Mahamane A, Sambou B, Sinsin B, Thiombiano A, Wittig R, Zizka G (2012) The West African Vegetation Database. Biodiversity and Ecology 4: 105-110.	observation data
Acacia macrostachya	1.78971	12.0339	West African Vegetation Database - records of Herbarium Senckenbergianum	Schmidt M, Janßen T, Dressler S, Hahn K, Hien M, Konaté S, Lykke AM, Mahamane A, Sambou B, Sinsin B, Thiombiano A, Wittig R, Zizka G (2012) The West African Vegetation Database. Biodiversity and Ecology 4: 105-110.	observation data
Acacia macrostachya	1.79237	12.0348	West African Vegetation Database - records of Herbarium Senckenbergianum	Schmidt M, Janßen T, Dressler S, Hahn K, Hien M, Konaté S, Lykke AM, Mahamane A, Sambou B, Sinsin B, Thiombiano A, Wittig R, Zizka G (2012) The West African Vegetation Database. Biodiversity and Ecology 4: 105-110.	observation data
Acacia macrostachya	1.79144	12.0349	West African Vegetation Database - records of Herbarium Senckenbergianum	Schmidt M, Janßen T, Dressler S, Hahn K, Hien M, Konaté S, Lykke AM, Mahamane A, Sambou B, Sinsin B, Thiombiano A, Wittig R, Zizka G (2012) The West African Vegetation Database. Biodiversity and Ecology 4: 105-110.	observation data
Acacia macrostachya	1.79049	12.0367	West African Vegetation Database - records of Herbarium Senckenbergianum	Schmidt M, Janßen T, Dressler S, Hahn K, Hien M, Konaté S, Lykke AM, Mahamane A, Sambou B, Sinsin B, Thiombiano A, Wittig R, Zizka G (2012) The West African Vegetation Database. Biodiversity and Ecology 4: 105-110.	observation data
Acacia macrostachya	1.78565	12.0472	West African Vegetation Database - records of Herbarium Senckenbergianum	Schmidt M, Janßen T, Dressler S, Hahn K, Hien M, Konaté S, Lykke AM, Mahamane A, Sambou B, Sinsin B, Thiombiano A, Wittig R, Zizka G (2012) The West African Vegetation Database. Biodiversity and Ecology 4: 105-110.	observation data
Acacia macrostachya	1.78593	12.0486	West African Vegetation Database - records of Herbarium Senckenbergianum	Schmidt M, Janßen T, Dressler S, Hahn K, Hien M, Konaté S, Lykke AM, Mahamane A, Sambou B, Sinsin B, Thiombiano A, Wittig R, Zizka G (2012) The West African Vegetation Database. Biodiversity and Ecology 4: 105-110.	observation data
Acacia macrostachya	0.35	12.0667	West African Vegetation Database - records of Herbarium Senckenbergianum	Schmidt M, Janßen T, Dressler S, Hahn K, Hien M, Konaté S, Lykke AM, Mahamane A, Sambou B, Sinsin B, Thiombiano A, Wittig R, Zizka G (2012) The West African Vegetation Database. Biodiversity and Ecology 4: 105-110.	observation data
Acacia macrostachya	1.78889	12.0708	West African Vegetation Database - records of Herbarium Senckenbergianum	Schmidt M, Janßen T, Dressler S, Hahn K, Hien M, Konaté S, Lykke AM, Mahamane A, Sambou B, Sinsin B, Thiombiano A, Wittig R, Zizka G (2012) The West African Vegetation Database. Biodiversity and Ecology 4: 105-110.	observation data
Acacia macrostachya	0.208517	12.1019	West African Vegetation Database - records of Herbarium Senckenbergianum	Schmidt M, Janßen T, Dressler S, Hahn K, Hien M, Konaté S, Lykke AM, Mahamane A, Sambou B, Sinsin B, Thiombiano A, Wittig R, Zizka G (2012) The West African Vegetation Database. Biodiversity and Ecology 4: 105-110.	observation data
Acacia macrostachya	0.169333	12.1025	West African Vegetation Database - records of Herbarium Senckenbergianum	Schmidt M, Janßen T, Dressler S, Hahn K, Hien M, Konaté S, Lykke AM, Mahamane A, Sambou B, Sinsin B, Thiombiano A, Wittig R, Zizka G (2012) The West African Vegetation Database. Biodiversity and Ecology 4: 105-110.	observation data
Acacia macrostachya	0.210417	12.103	West African Vegetation Database - records of Herbarium Senckenbergianum	Schmidt M, Janßen T, Dressler S, Hahn K, Hien M, Konaté S, Lykke AM, Mahamane A, Sambou B, Sinsin B, Thiombiano A, Wittig R, Zizka G (2012) The West African Vegetation Database. Biodiversity and Ecology 4: 105-110.	observation data
Acacia macrostachya	0.211833	12.1037	West African Vegetation Database - records of Herbarium Senckenbergianum	Schmidt M, Janßen T, Dressler S, Hahn K, Hien M, Konaté S, Lykke AM, Mahamane A, Sambou B, Sinsin B, Thiombiano A, Wittig R, Zizka G (2012) The West African Vegetation Database. Biodiversity and Ecology 4: 105-110.	observation data
Acacia macrostachya	0.213633	12.1107	West African Vegetation Database - records of Herbarium Senckenbergianum	Schmidt M, Janßen T, Dressler S, Hahn K, Hien M, Konaté S, Lykke AM, Mahamane A, Sambou B, Sinsin B, Thiombiano A, Wittig R, Zizka G (2012) The West African Vegetation Database. Biodiversity and Ecology 4: 105-110.	observation data
Acacia macrostachya	1.81611	12.1352	West African Vegetation Database - records of Herbarium Senckenbergianum	Schmidt M, Janßen T, Dressler S, Hahn K, Hien M, Konaté S, Lykke AM, Mahamane A, Sambou B, Sinsin B, Thiombiano A, Wittig R, Zizka G (2012) The West African Vegetation Database. Biodiversity and Ecology 4: 105-110.	observation data
Acacia macrostachya	1.81484	12.1356	West African Vegetation Database - records of Herbarium Senckenbergianum	Schmidt M, Janßen T, Dressler S, Hahn K, Hien M, Konaté S, Lykke AM, Mahamane A, Sambou B, Sinsin B, Thiombiano A, Wittig R, Zizka G (2012) The West African Vegetation Database. Biodiversity and Ecology 4: 105-110.	observation data
Acacia macrostachya	1.8166	12.1371	West African Vegetation Database - records of Herbarium Senckenbergianum	Schmidt M, Janßen T, Dressler S, Hahn K, Hien M, Konaté S, Lykke AM, Mahamane A, Sambou B, Sinsin B, Thiombiano A, Wittig R, Zizka G (2012) The West African Vegetation Database. Biodiversity and Ecology 4: 105-110.	observation data
Acacia macrostachya	1.82099	12.138	West African Vegetation Database - records of Herbarium Senckenbergianum	Schmidt M, Janßen T, Dressler S, Hahn K, Hien M, Konaté S, Lykke AM, Mahamane A, Sambou B, Sinsin B, Thiombiano A, Wittig R, Zizka G (2012) The West African Vegetation Database. Biodiversity and Ecology 4: 105-110.	observation data
Acacia macrostachya	1.82091	12.1385	West African Vegetation Database - records of Herbarium Senckenbergianum	Schmidt M, Janßen T, Dressler S, Hahn K, Hien M, Konaté S, Lykke AM, Mahamane A, Sambou B, Sinsin B, Thiombiano A, Wittig R, Zizka G (2012) The West African Vegetation Database. Biodiversity and Ecology 4: 105-110.	observation data
Acacia macrostachya	0.160567	12.1475	West African Vegetation Database - records of Herbarium Senckenbergianum	Schmidt M, Janßen T, Dressler S, Hahn K, Hien M, Konaté S, Lykke AM, Mahamane A, Sambou B, Sinsin B, Thiombiano A, Wittig R, Zizka G (2012) The West African Vegetation Database. Biodiversity and Ecology 4: 105-110.	observation data
Acacia macrostachya	0.155183	12.15	West African Vegetation Database - records of Herbarium Senckenbergianum	Schmidt M, Janßen T, Dressler S, Hahn K, Hien M, Konaté S, Lykke AM, Mahamane A, Sambou B, Sinsin B, Thiombiano A, Wittig R, Zizka G (2012) The West African Vegetation Database. Biodiversity and Ecology 4: 105-110.	observation data
Acacia macrostachya	0.15075	12.1531	West African Vegetation Database - records of Herbarium Senckenbergianum	Schmidt M, Janßen T, Dressler S, Hahn K, Hien M, Konaté S, Lykke AM, Mahamane A, Sambou B, Sinsin B, Thiombiano A, Wittig R, Zizka G (2012) The West African Vegetation Database. Biodiversity and Ecology 4: 105-110.	observation data
Acacia macrostachya	1.84501	12.1613	West African Vegetation Database - records of Herbarium Senckenbergianum	Schmidt M, Janßen T, Dressler S, Hahn K, Hien M, Konaté S, Lykke AM, Mahamane A, Sambou B, Sinsin B, Thiombiano A, Wittig R, Zizka G (2012) The West African Vegetation Database. Biodiversity and Ecology 4: 105-110.	observation data
Acacia macrostachya	1.84477	12.1617	West African Vegetation Database - records of Herbarium Senckenbergianum	Schmidt M, Janßen T, Dressler S, Hahn K, Hien M, Konaté S, Lykke AM, Mahamane A, Sambou B, Sinsin B, Thiombiano A, Wittig R, Zizka G (2012) The West African Vegetation Database. Biodiversity and Ecology 4: 105-110.	observation data
Acacia macrostachya	1.84403	12.1631	West African Vegetation Database - records of Herbarium Senckenbergianum	Schmidt M, Janßen T, Dressler S, Hahn K, Hien M, Konaté S, Lykke AM, Mahamane A, Sambou B, Sinsin B, Thiombiano A, Wittig R, Zizka G (2012) The West African Vegetation Database. Biodiversity and Ecology 4: 105-110.	observation data
Acacia macrostachya	1.84535	12.1642	West African Vegetation Database - records of Herbarium Senckenbergianum	Schmidt M, Janßen T, Dressler S, Hahn K, Hien M, Konaté S, Lykke AM, Mahamane A, Sambou B, Sinsin B, Thiombiano A, Wittig R, Zizka G (2012) The West African Vegetation Database. Biodiversity and Ecology 4: 105-110.	observation data
Acacia macrostachya	1.84642	12.1644	West African Vegetation Database - records of Herbarium Senckenbergianum	Schmidt M, Janßen T, Dressler S, Hahn K, Hien M, Konaté S, Lykke AM, Mahamane A, Sambou B, Sinsin B, Thiombiano A, Wittig R, Zizka G (2012) The West African Vegetation Database. Biodiversity and Ecology 4: 105-110.	observation data
Acacia macrostachya	1.88851	12.2081	West African Vegetation Database - records of Herbarium Senckenbergianum	Schmidt M, Janßen T, Dressler S, Hahn K, Hien M, Konaté S, Lykke AM, Mahamane A, Sambou B, Sinsin B, Thiombiano A, Wittig R, Zizka G (2012) The West African Vegetation Database. Biodiversity and Ecology 4: 105-110.	observation data
Acacia macrostachya	1.88691	12.209	West African Vegetation Database - records of Herbarium Senckenbergianum	Schmidt M, Janßen T, Dressler S, Hahn K, Hien M, Konaté S, Lykke AM, Mahamane A, Sambou B, Sinsin B, Thiombiano A, Wittig R, Zizka G (2012) The West African Vegetation Database. Biodiversity and Ecology 4: 105-110.	observation data
Acacia macrostachya	1.88531	12.214	West African Vegetation Database - records of Herbarium Senckenbergianum	Schmidt M, Janßen T, Dressler S, Hahn K, Hien M, Konaté S, Lykke AM, Mahamane A, Sambou B, Sinsin B, Thiombiano A, Wittig R, Zizka G (2012) The West African Vegetation Database. Biodiversity and Ecology 4: 105-110.	observation data
Acacia macrostachya	-0.626283	14.8622	West African Vegetation Database - records of Herbarium Senckenbergianum	Schmidt M, Janßen T, Dressler S, Hahn K, Hien M, Konaté S, Lykke AM, Mahamane A, Sambou B, Sinsin B, Thiombiano A, Wittig R, Zizka G (2012) The West African Vegetation Database. Biodiversity and Ecology 4: 105-110.	observation data
Acacia macrostachya	-3.73676	11.8693	West African Plants Database	Brunken U, Schmidt M, Dressler S, Janssen T, Thiombiano A, Zizka G (2008) www.westafricanplants.senckenberg.de - An image-based identification tool for West African Plants. Taxon 57 (3): 1027-1028.	georeferenced photo records
Acacia macrostachya	-3.73676	11.8693	West African Plants Database	Brunken U, Schmidt M, Dressler S, Janssen T, Thiombiano A, Zizka G (2008) www.westafricanplants.senckenberg.de - An image-based identification tool for West African Plants. Taxon 57 (3): 1027-1028.	georeferenced photo records
Acacia macrostachya	-7.28722	12.8559	West African Plants Database	Brunken U, Schmidt M, Dressler S, Janssen T, Thiombiano A, Zizka G (2008) www.westafricanplants.senckenberg.de - An image-based identification tool for West African Plants. Taxon 57 (3): 1027-1028.	georeferenced photo records
Acacia macrostachya	-6.25787	13.4463	West African Plants Database	Brunken U, Schmidt M, Dressler S, Janssen T, Thiombiano A, Zizka G (2008) www.westafricanplants.senckenberg.de - An image-based identification tool for West African Plants. Taxon 57 (3): 1027-1028.	georeferenced photo records
Acacia macrostachya	-4.0233	14.892	West African Plants Database	Brunken U, Schmidt M, Dressler S, Janssen T, Thiombiano A, Zizka G (2008) www.westafricanplants.senckenberg.de - An image-based identification tool for West African Plants. Taxon 57 (3): 1027-1028.	georeferenced photo records
Acacia macrostachya	-3.0625	11.9792	Terrible tree species distribution map - georeferenced in Google Earth by Tor-Gunnar Vagen (ICRAF)	Terrible PB. Atlas de la Haute-Volta. Arbres et arbustes. Carte de répartition et de présence de 65 espèces. 1975	Georeferenced point locations created by Roeland Kindt (ICRAF) in centre of 2.5 minutes AFRICLIM grid cells
Acacia macrostachya	-3.27083	11.5625	Terrible tree species distribution map - georeferenced in Google Earth by Tor-Gunnar Vagen (ICRAF)	Terrible PB. Atlas de la Haute-Volta. Arbres et arbustes. Carte de répartition et de présence de 65 espèces. 1975	Georeferenced point locations created by Roeland Kindt (ICRAF) in centre of 2.5 minutes AFRICLIM grid cells
Acacia macrostachya	0.0208333	14.8958	Terrible tree species distribution map - georeferenced in Google Earth by Tor-Gunnar Vagen (ICRAF)	Terrible PB. Atlas de la Haute-Volta. Arbres et arbustes. Carte de répartition et de présence de 65 espèces. 1975	Georeferenced point locations created by Roeland Kindt (ICRAF) in centre of 2.5 minutes AFRICLIM grid cells
Acacia macrostachya	0.0208333	14.7708	Terrible tree species distribution map - georeferenced in Google Earth by Tor-Gunnar Vagen (ICRAF)	Terrible PB. Atlas de la Haute-Volta. Arbres et arbustes. Carte de répartition et de présence de 65 espèces. 1975	Georeferenced point locations created by Roeland Kindt (ICRAF) in centre of 2.5 minutes AFRICLIM grid cells
Acacia macrostachya	0.1875	13.8125	Terrible tree species distribution map - georeferenced in Google Earth by Tor-Gunnar Vagen (ICRAF)	Terrible PB. Atlas de la Haute-Volta. Arbres et arbustes. Carte de répartition et de présence de 65 espèces. 1975	Georeferenced point locations created by Roeland Kindt (ICRAF) in centre of 2.5 minutes AFRICLIM grid cells
Acacia macrostachya	-0.145833	13.1875	Terrible tree species distribution map - georeferenced in Google Earth by Tor-Gunnar Vagen (ICRAF)	Terrible PB. Atlas de la Haute-Volta. Arbres et arbustes. Carte de répartition et de présence de 65 espèces. 1975	Georeferenced point locations created by Roeland Kindt (ICRAF) in centre of 2.5 minutes AFRICLIM grid cells
Acacia macrostachya	-0.145833	13.1042	Terrible tree species distribution map - georeferenced in Google Earth by Tor-Gunnar Vagen (ICRAF)	Terrible PB. Atlas de la Haute-Volta. Arbres et arbustes. Carte de répartition et de présence de 65 espèces. 1975	Georeferenced point locations created by Roeland Kindt (ICRAF) in centre of 2.5 minutes AFRICLIM grid cells
Acacia macrostachya	-0.1875	13.0625	Terrible tree species distribution map - georeferenced in Google Earth by Tor-Gunnar Vagen (ICRAF)	Terrible PB. Atlas de la Haute-Volta. Arbres et arbustes. Carte de répartition et de présence de 65 espèces. 1975	Georeferenced point locations created by Roeland Kindt (ICRAF) in centre of 2.5 minutes AFRICLIM grid cells
Acacia macrostachya	-0.145833	12.7708	Terrible tree species distribution map - georeferenced in Google Earth by Tor-Gunnar Vagen (ICRAF)	Terrible PB. Atlas de la Haute-Volta. Arbres et arbustes. Carte de répartition et de présence de 65 espèces. 1975	Georeferenced point locations created by Roeland Kindt (ICRAF) in centre of 2.5 minutes AFRICLIM grid cells
Acacia macrostachya	-0.270833	12.7292	Terrible tree species distribution map - georeferenced in Google Earth by Tor-Gunnar Vagen (ICRAF)	Terrible PB. Atlas de la Haute-Volta. Arbres et arbustes. Carte de répartition et de présence de 65 espèces. 1975	Georeferenced point locations created by Roeland Kindt (ICRAF) in centre of 2.5 minutes AFRICLIM grid cells
Acacia macrostachya	0.4375	12.6875	Terrible tree species distribution map - georeferenced in Google Earth by Tor-Gunnar Vagen (ICRAF)	Terrible PB. Atlas de la Haute-Volta. Arbres et arbustes. Carte de répartition et de présence de 65 espèces. 1975	Georeferenced point locations created by Roeland Kindt (ICRAF) in centre of 2.5 minutes AFRICLIM grid cells
Acacia macrostachya	0.395833	12.4792	Terrible tree species distribution map - georeferenced in Google Earth by Tor-Gunnar Vagen (ICRAF)	Terrible PB. Atlas de la Haute-Volta. Arbres et arbustes. Carte de répartition et de présence de 65 espèces. 1975	Georeferenced point locations created by Roeland Kindt (ICRAF) in centre of 2.5 minutes AFRICLIM grid cells
Acacia macrostachya	0.895833	12.4375	Terrible tree species distribution map - georeferenced in Google Earth by Tor-Gunnar Vagen (ICRAF)	Terrible PB. Atlas de la Haute-Volta. Arbres et arbustes. Carte de répartition et de présence de 65 espèces. 1975	Georeferenced point locations created by Roeland Kindt (ICRAF) in centre of 2.5 minutes AFRICLIM grid cells
Acacia macrostachya	1.39583	12.4375	Terrible tree species distribution map - georeferenced in Google Earth by Tor-Gunnar Vagen (ICRAF)	Terrible PB. Atlas de la Haute-Volta. Arbres et arbustes. Carte de répartition et de présence de 65 espèces. 1975	Georeferenced point locations created by Roeland Kindt (ICRAF) in centre of 2.5 minutes AFRICLIM grid cells
Acacia macrostachya	1.4375	12.4375	Terrible tree species distribution map - georeferenced in Google Earth by Tor-Gunnar Vagen (ICRAF)	Terrible PB. Atlas de la Haute-Volta. Arbres et arbustes. Carte de répartition et de présence de 65 espèces. 1975	Georeferenced point locations created by Roeland Kindt (ICRAF) in centre of 2.5 minutes AFRICLIM grid cells
Acacia macrostachya	1.9375	12.6042	Terrible tree species distribution map - georeferenced in Google Earth by Tor-Gunnar Vagen (ICRAF)	Terrible PB. Atlas de la Haute-Volta. Arbres et arbustes. Carte de répartition et de présence de 65 espèces. 1975	Georeferenced point locations created by Roeland Kindt (ICRAF) in centre of 2.5 minutes AFRICLIM grid cells
Acacia macrostachya	1.64583	12.5208	Terrible tree species distribution map - georeferenced in Google Earth by Tor-Gunnar Vagen (ICRAF)	Terrible PB. Atlas de la Haute-Volta. Arbres et arbustes. Carte de répartition et de présence de 65 espèces. 1975	Georeferenced point locations created by Roeland Kindt (ICRAF) in centre of 2.5 minutes AFRICLIM grid cells
Acacia macrostachya	1.60417	12.4792	Terrible tree species distribution map - georeferenced in Google Earth by Tor-Gunnar Vagen (ICRAF)	Terrible PB. Atlas de la Haute-Volta. Arbres et arbustes. Carte de répartition et de présence de 65 espèces. 1975	Georeferenced point locations created by Roeland Kindt (ICRAF) in centre of 2.5 minutes AFRICLIM grid cells
Acacia macrostachya	1.5625	12.3958	Terrible tree species distribution map - georeferenced in Google Earth by Tor-Gunnar Vagen (ICRAF)	Terrible PB. Atlas de la Haute-Volta. Arbres et arbustes. Carte de répartition et de présence de 65 espèces. 1975	Georeferenced point locations created by Roeland Kindt (ICRAF) in centre of 2.5 minutes AFRICLIM grid cells
Acacia macrostachya	1.6875	12.2292	Terrible tree species distribution map - georeferenced in Google Earth by Tor-Gunnar Vagen (ICRAF)	Terrible PB. Atlas de la Haute-Volta. Arbres et arbustes. Carte de répartition et de présence de 65 espèces. 1975	Georeferenced point locations created by Roeland Kindt (ICRAF) in centre of 2.5 minutes AFRICLIM grid cells
Acacia macrostachya	1.89583	12.0625	Terrible tree species distribution map - georeferenced in Google Earth by Tor-Gunnar Vagen (ICRAF)	Terrible PB. Atlas de la Haute-Volta. Arbres et arbustes. Carte de répartition et de présence de 65 espèces. 1975	Georeferenced point locations created by Roeland Kindt (ICRAF) in centre of 2.5 minutes AFRICLIM grid cells
Acacia macrostachya	2.02083	12.0625	Terrible tree species distribution map - georeferenced in Google Earth by Tor-Gunnar Vagen (ICRAF)	Terrible PB. Atlas de la Haute-Volta. Arbres et arbustes. Carte de répartition et de présence de 65 espèces. 1975	Georeferenced point locations created by Roeland Kindt (ICRAF) in centre of 2.5 minutes AFRICLIM grid cells
Acacia macrostachya	2.02083	11.9792	Terrible tree species distribution map - georeferenced in Google Earth by Tor-Gunnar Vagen (ICRAF)	Terrible PB. Atlas de la Haute-Volta. Arbres et arbustes. Carte de répartition et de présence de 65 espèces. 1975	Georeferenced point locations created by Roeland Kindt (ICRAF) in centre of 2.5 minutes AFRICLIM grid cells
Acacia macrostachya	-0.854167	14.2708	Terrible tree species distribution map - georeferenced in Google Earth by Tor-Gunnar Vagen (ICRAF)	Terrible PB. Atlas de la Haute-Volta. Arbres et arbustes. Carte de répartition et de présence de 65 espèces. 1975	Georeferenced point locations created by Roeland Kindt (ICRAF) in centre of 2.5 minutes AFRICLIM grid cells
Acacia macrostachya	-0.145833	13.7292	Terrible tree species distribution map - georeferenced in Google Earth by Tor-Gunnar Vagen (ICRAF)	Terrible PB. Atlas de la Haute-Volta. Arbres et arbustes. Carte de répartition et de présence de 65 espèces. 1975	Georeferenced point locations created by Roeland Kindt (ICRAF) in centre of 2.5 minutes AFRICLIM grid cells
Acacia macrostachya	1.97917	11.8958	Terrible tree species distribution map - georeferenced in Google Earth by Tor-Gunnar Vagen (ICRAF)	Terrible PB. Atlas de la Haute-Volta. Arbres et arbustes. Carte de répartition et de présence de 65 espèces. 1975	Georeferenced point locations created by Roeland Kindt (ICRAF) in centre of 2.5 minutes AFRICLIM grid cells
Acacia macrostachya	1.77083	11.8125	Terrible tree species distribution map - georeferenced in Google Earth by Tor-Gunnar Vagen (ICRAF)	Terrible PB. Atlas de la Haute-Volta. Arbres et arbustes. Carte de répartition et de présence de 65 espèces. 1975	Georeferenced point locations created by Roeland Kindt (ICRAF) in centre of 2.5 minutes AFRICLIM grid cells
Acacia macrostachya	2.02083	11.7708	Terrible tree species distribution map - georeferenced in Google Earth by Tor-Gunnar Vagen (ICRAF)	Terrible PB. Atlas de la Haute-Volta. Arbres et arbustes. Carte de répartition et de présence de 65 espèces. 1975	Georeferenced point locations created by Roeland Kindt (ICRAF) in centre of 2.5 minutes AFRICLIM grid cells
Acacia macrostachya	1.64583	11.4375	Terrible tree species distribution map - georeferenced in Google Earth by Tor-Gunnar Vagen (ICRAF)	Terrible PB. Atlas de la Haute-Volta. Arbres et arbustes. Carte de répartition et de présence de 65 espèces. 1975	Georeferenced point locations created by Roeland Kindt (ICRAF) in centre of 2.5 minutes AFRICLIM grid cells
Acacia macrostachya	1.39583	11.4792	Terrible tree species distribution map - georeferenced in Google Earth by Tor-Gunnar Vagen (ICRAF)	Terrible PB. Atlas de la Haute-Volta. Arbres et arbustes. Carte de répartition et de présence de 65 espèces. 1975	Georeferenced point locations created by Roeland Kindt (ICRAF) in centre of 2.5 minutes AFRICLIM grid cells
Acacia macrostachya	1.27083	11.4792	Terrible tree species distribution map - georeferenced in Google Earth by Tor-Gunnar Vagen (ICRAF)	Terrible PB. Atlas de la Haute-Volta. Arbres et arbustes. Carte de répartition et de présence de 65 espèces. 1975	Georeferenced point locations created by Roeland Kindt (ICRAF) in centre of 2.5 minutes AFRICLIM grid cells
Acacia macrostachya	0.520833	11.6458	Terrible tree species distribution map - georeferenced in Google Earth by Tor-Gunnar Vagen (ICRAF)	Terrible PB. Atlas de la Haute-Volta. Arbres et arbustes. Carte de répartition et de présence de 65 espèces. 1975	Georeferenced point locations created by Roeland Kindt (ICRAF) in centre of 2.5 minutes AFRICLIM grid cells
Acacia macrostachya	0.645833	12.0625	Terrible tree species distribution map - georeferenced in Google Earth by Tor-Gunnar Vagen (ICRAF)	Terrible PB. Atlas de la Haute-Volta. Arbres et arbustes. Carte de répartition et de présence de 65 espèces. 1975	Georeferenced point locations created by Roeland Kindt (ICRAF) in centre of 2.5 minutes AFRICLIM grid cells
Acacia macrostachya	-1.9375	14.1875	Terrible tree species distribution map - georeferenced in Google Earth by Tor-Gunnar Vagen (ICRAF)	Terrible PB. Atlas de la Haute-Volta. Arbres et arbustes. Carte de répartition et de présence de 65 espèces. 1975	Georeferenced point locations created by Roeland Kindt (ICRAF) in centre of 2.5 minutes AFRICLIM grid cells
Acacia macrostachya	-1.64583	14.0625	Terrible tree species distribution map - georeferenced in Google Earth by Tor-Gunnar Vagen (ICRAF)	Terrible PB. Atlas de la Haute-Volta. Arbres et arbustes. Carte de répartition et de présence de 65 espèces. 1975	Georeferenced point locations created by Roeland Kindt (ICRAF) in centre of 2.5 minutes AFRICLIM grid cells
Acacia macrostachya	-1.60417	13.9792	Terrible tree species distribution map - georeferenced in Google Earth by Tor-Gunnar Vagen (ICRAF)	Terrible PB. Atlas de la Haute-Volta. Arbres et arbustes. Carte de répartition et de présence de 65 espèces. 1975	Georeferenced point locations created by Roeland Kindt (ICRAF) in centre of 2.5 minutes AFRICLIM grid cells
Acacia macrostachya	-1.60417	13.8542	Terrible tree species distribution map - georeferenced in Google Earth by Tor-Gunnar Vagen (ICRAF)	Terrible PB. Atlas de la Haute-Volta. Arbres et arbustes. Carte de répartition et de présence de 65 espèces. 1975	Georeferenced point locations created by Roeland Kindt (ICRAF) in centre of 2.5 minutes AFRICLIM grid cells
Acacia macrostachya	-1.5625	13.6458	Terrible tree species distribution map - georeferenced in Google Earth by Tor-Gunnar Vagen (ICRAF)	Terrible PB. Atlas de la Haute-Volta. Arbres et arbustes. Carte de répartition et de présence de 65 espèces. 1975	Georeferenced point locations created by Roeland Kindt (ICRAF) in centre of 2.5 minutes AFRICLIM grid cells
Acacia macrostachya	-0.354167	13.4792	Terrible tree species distribution map - georeferenced in Google Earth by Tor-Gunnar Vagen (ICRAF)	Terrible PB. Atlas de la Haute-Volta. Arbres et arbustes. Carte de répartition et de présence de 65 espèces. 1975	Georeferenced point locations created by Roeland Kindt (ICRAF) in centre of 2.5 minutes AFRICLIM grid cells
Acacia macrostachya	-0.979167	13.4375	Terrible tree species distribution map - georeferenced in Google Earth by Tor-Gunnar Vagen (ICRAF)	Terrible PB. Atlas de la Haute-Volta. Arbres et arbustes. Carte de répartition et de présence de 65 espèces. 1975	Georeferenced point locations created by Roeland Kindt (ICRAF) in centre of 2.5 minutes AFRICLIM grid cells
Acacia macrostachya	-1.10417	13.2708	Terrible tree species distribution map - georeferenced in Google Earth by Tor-Gunnar Vagen (ICRAF)	Terrible PB. Atlas de la Haute-Volta. Arbres et arbustes. Carte de répartition et de présence de 65 espèces. 1975	Georeferenced point locations created by Roeland Kindt (ICRAF) in centre of 2.5 minutes AFRICLIM grid cells
Acacia macrostachya	-1.0625	13.2292	Terrible tree species distribution map - georeferenced in Google Earth by Tor-Gunnar Vagen (ICRAF)	Terrible PB. Atlas de la Haute-Volta. Arbres et arbustes. Carte de répartition et de présence de 65 espèces. 1975	Georeferenced point locations created by Roeland Kindt (ICRAF) in centre of 2.5 minutes AFRICLIM grid cells
Acacia macrostachya	-1.02083	13.1458	Terrible tree species distribution map - georeferenced in Google Earth by Tor-Gunnar Vagen (ICRAF)	Terrible PB. Atlas de la Haute-Volta. Arbres et arbustes. Carte de répartition et de présence de 65 espèces. 1975	Georeferenced point locations created by Roeland Kindt (ICRAF) in centre of 2.5 minutes AFRICLIM grid cells
Acacia macrostachya	-1.0625	13.1458	Terrible tree species distribution map - georeferenced in Google Earth by Tor-Gunnar Vagen (ICRAF)	Terrible PB. Atlas de la Haute-Volta. Arbres et arbustes. Carte de répartition et de présence de 65 espèces. 1975	Georeferenced point locations created by Roeland Kindt (ICRAF) in centre of 2.5 minutes AFRICLIM grid cells
Acacia macrostachya	-0.979167	13.1042	Terrible tree species distribution map - georeferenced in Google Earth by Tor-Gunnar Vagen (ICRAF)	Terrible PB. Atlas de la Haute-Volta. Arbres et arbustes. Carte de répartition et de présence de 65 espèces. 1975	Georeferenced point locations created by Roeland Kindt (ICRAF) in centre of 2.5 minutes AFRICLIM grid cells
Acacia macrostachya	-0.895833	12.9375	Terrible tree species distribution map - georeferenced in Google Earth by Tor-Gunnar Vagen (ICRAF)	Terrible PB. Atlas de la Haute-Volta. Arbres et arbustes. Carte de répartition et de présence de 65 espèces. 1975	Georeferenced point locations created by Roeland Kindt (ICRAF) in centre of 2.5 minutes AFRICLIM grid cells
Acacia macrostachya	1.3125	12.3958	Terrible tree species distribution map - georeferenced in Google Earth by Tor-Gunnar Vagen (ICRAF)	Terrible PB. Atlas de la Haute-Volta. Arbres et arbustes. Carte de répartition et de présence de 65 espèces. 1975	Georeferenced point locations created by Roeland Kindt (ICRAF) in centre of 2.5 minutes AFRICLIM grid cells
Acacia macrostachya	0.9375	12.1875	Terrible tree species distribution map - georeferenced in Google Earth by Tor-Gunnar Vagen (ICRAF)	Terrible PB. Atlas de la Haute-Volta. Arbres et arbustes. Carte de répartition et de présence de 65 espèces. 1975	Georeferenced point locations created by Roeland Kindt (ICRAF) in centre of 2.5 minutes AFRICLIM grid cells
Acacia macrostachya	1.72917	11.9375	Terrible tree species distribution map - georeferenced in Google Earth by Tor-Gunnar Vagen (ICRAF)	Terrible PB. Atlas de la Haute-Volta. Arbres et arbustes. Carte de répartition et de présence de 65 espèces. 1975	Georeferenced point locations created by Roeland Kindt (ICRAF) in centre of 2.5 minutes AFRICLIM grid cells
Acacia macrostachya	1.6875	11.8125	Terrible tree species distribution map - georeferenced in Google Earth by Tor-Gunnar Vagen (ICRAF)	Terrible PB. Atlas de la Haute-Volta. Arbres et arbustes. Carte de répartition et de présence de 65 espèces. 1975	Georeferenced point locations created by Roeland Kindt (ICRAF) in centre of 2.5 minutes AFRICLIM grid cells
Acacia macrostachya	1.8125	11.8125	Terrible tree species distribution map - georeferenced in Google Earth by Tor-Gunnar Vagen (ICRAF)	Terrible PB. Atlas de la Haute-Volta. Arbres et arbustes. Carte de répartition et de présence de 65 espèces. 1975	Georeferenced point locations created by Roeland Kindt (ICRAF) in centre of 2.5 minutes AFRICLIM grid cells
Acacia macrostachya	1.6875	11.7708	Terrible tree species distribution map - georeferenced in Google Earth by Tor-Gunnar Vagen (ICRAF)	Terrible PB. Atlas de la Haute-Volta. Arbres et arbustes. Carte de répartition et de présence de 65 espèces. 1975	Georeferenced point locations created by Roeland Kindt (ICRAF) in centre of 2.5 minutes AFRICLIM grid cells
Acacia macrostachya	1.6875	11.7292	Terrible tree species distribution map - georeferenced in Google Earth by Tor-Gunnar Vagen (ICRAF)	Terrible PB. Atlas de la Haute-Volta. Arbres et arbustes. Carte de répartition et de présence de 65 espèces. 1975	Georeferenced point locations created by Roeland Kindt (ICRAF) in centre of 2.5 minutes AFRICLIM grid cells
Acacia macrostachya	1.77083	11.7708	Terrible tree species distribution map - georeferenced in Google Earth by Tor-Gunnar Vagen (ICRAF)	Terrible PB. Atlas de la Haute-Volta. Arbres et arbustes. Carte de répartition et de présence de 65 espèces. 1975	Georeferenced point locations created by Roeland Kindt (ICRAF) in centre of 2.5 minutes AFRICLIM grid cells
Acacia macrostachya	0.479167	12.0625	Terrible tree species distribution map - georeferenced in Google Earth by Tor-Gunnar Vagen (ICRAF)	Terrible PB. Atlas de la Haute-Volta. Arbres et arbustes. Carte de répartition et de présence de 65 espèces. 1975	Georeferenced point locations created by Roeland Kindt (ICRAF) in centre of 2.5 minutes AFRICLIM grid cells
Acacia macrostachya	0.3125	12.1875	Terrible tree species distribution map - georeferenced in Google Earth by Tor-Gunnar Vagen (ICRAF)	Terrible PB. Atlas de la Haute-Volta. Arbres et arbustes. Carte de répartition et de présence de 65 espèces. 1975	Georeferenced point locations created by Roeland Kindt (ICRAF) in centre of 2.5 minutes AFRICLIM grid cells
Acacia macrostachya	0.354167	12.3542	Terrible tree species distribution map - georeferenced in Google Earth by Tor-Gunnar Vagen (ICRAF)	Terrible PB. Atlas de la Haute-Volta. Arbres et arbustes. Carte de répartition et de présence de 65 espèces. 1975	Georeferenced point locations created by Roeland Kindt (ICRAF) in centre of 2.5 minutes AFRICLIM grid cells
Acacia macrostachya	-0.1875	12.0625	Terrible tree species distribution map - georeferenced in Google Earth by Tor-Gunnar Vagen (ICRAF)	Terrible PB. Atlas de la Haute-Volta. Arbres et arbustes. Carte de répartition et de présence de 65 espèces. 1975	Georeferenced point locations created by Roeland Kindt (ICRAF) in centre of 2.5 minutes AFRICLIM grid cells
Acacia macrostachya	-0.145833	12.0208	Terrible tree species distribution map - georeferenced in Google Earth by Tor-Gunnar Vagen (ICRAF)	Terrible PB. Atlas de la Haute-Volta. Arbres et arbustes. Carte de répartition et de présence de 65 espèces. 1975	Georeferenced point locations created by Roeland Kindt (ICRAF) in centre of 2.5 minutes AFRICLIM grid cells
Acacia macrostachya	-0.4375	12.6875	Terrible tree species distribution map - georeferenced in Google Earth by Tor-Gunnar Vagen (ICRAF)	Terrible PB. Atlas de la Haute-Volta. Arbres et arbustes. Carte de répartition et de présence de 65 espèces. 1975	Georeferenced point locations created by Roeland Kindt (ICRAF) in centre of 2.5 minutes AFRICLIM grid cells
Acacia macrostachya	-0.520833	12.5625	Terrible tree species distribution map - georeferenced in Google Earth by Tor-Gunnar Vagen (ICRAF)	Terrible PB. Atlas de la Haute-Volta. Arbres et arbustes. Carte de répartition et de présence de 65 espèces. 1975	Georeferenced point locations created by Roeland Kindt (ICRAF) in centre of 2.5 minutes AFRICLIM grid cells
Acacia macrostachya	-0.479167	12.4375	Terrible tree species distribution map - georeferenced in Google Earth by Tor-Gunnar Vagen (ICRAF)	Terrible PB. Atlas de la Haute-Volta. Arbres et arbustes. Carte de répartition et de présence de 65 espèces. 1975	Georeferenced point locations created by Roeland Kindt (ICRAF) in centre of 2.5 minutes AFRICLIM grid cells
Acacia macrostachya	-1.1875	11.7708	Terrible tree species distribution map - georeferenced in Google Earth by Tor-Gunnar Vagen (ICRAF)	Terrible PB. Atlas de la Haute-Volta. Arbres et arbustes. Carte de répartition et de présence de 65 espèces. 1975	Georeferenced point locations created by Roeland Kindt (ICRAF) in centre of 2.5 minutes AFRICLIM grid cells
Acacia macrostachya	-1.14583	11.7708	Terrible tree species distribution map - georeferenced in Google Earth by Tor-Gunnar Vagen (ICRAF)	Terrible PB. Atlas de la Haute-Volta. Arbres et arbustes. Carte de répartition et de présence de 65 espèces. 1975	Georeferenced point locations created by Roeland Kindt (ICRAF) in centre of 2.5 minutes AFRICLIM grid cells
Acacia macrostachya	-1.5625	11.9375	Terrible tree species distribution map - georeferenced in Google Earth by Tor-Gunnar Vagen (ICRAF)	Terrible PB. Atlas de la Haute-Volta. Arbres et arbustes. Carte de répartition et de présence de 65 espèces. 1975	Georeferenced point locations created by Roeland Kindt (ICRAF) in centre of 2.5 minutes AFRICLIM grid cells
Acacia macrostachya	-1.4375	12.1875	Terrible tree species distribution map - georeferenced in Google Earth by Tor-Gunnar Vagen (ICRAF)	Terrible PB. Atlas de la Haute-Volta. Arbres et arbustes. Carte de répartition et de présence de 65 espèces. 1975	Georeferenced point locations created by Roeland Kindt (ICRAF) in centre of 2.5 minutes AFRICLIM grid cells
Acacia macrostachya	-1.0625	12.3958	Terrible tree species distribution map - georeferenced in Google Earth by Tor-Gunnar Vagen (ICRAF)	Terrible PB. Atlas de la Haute-Volta. Arbres et arbustes. Carte de répartition et de présence de 65 espèces. 1975	Georeferenced point locations created by Roeland Kindt (ICRAF) in centre of 2.5 minutes AFRICLIM grid cells
Acacia macrostachya	-1.0625	12.3542	Terrible tree species distribution map - georeferenced in Google Earth by Tor-Gunnar Vagen (ICRAF)	Terrible PB. Atlas de la Haute-Volta. Arbres et arbustes. Carte de répartition et de présence de 65 espèces. 1975	Georeferenced point locations created by Roeland Kindt (ICRAF) in centre of 2.5 minutes AFRICLIM grid cells
Acacia macrostachya	-1.47917	12.3125	Terrible tree species distribution map - georeferenced in Google Earth by Tor-Gunnar Vagen (ICRAF)	Terrible PB. Atlas de la Haute-Volta. Arbres et arbustes. Carte de répartition et de présence de 65 espèces. 1975	Georeferenced point locations created by Roeland Kindt (ICRAF) in centre of 2.5 minutes AFRICLIM grid cells
Acacia macrostachya	-1.47917	13.3125	Terrible tree species distribution map - georeferenced in Google Earth by Tor-Gunnar Vagen (ICRAF)	Terrible PB. Atlas de la Haute-Volta. Arbres et arbustes. Carte de répartition et de présence de 65 espèces. 1975	Georeferenced point locations created by Roeland Kindt (ICRAF) in centre of 2.5 minutes AFRICLIM grid cells
Acacia macrostachya	-1.1875	13.2292	Terrible tree species distribution map - georeferenced in Google Earth by Tor-Gunnar Vagen (ICRAF)	Terrible PB. Atlas de la Haute-Volta. Arbres et arbustes. Carte de répartition et de présence de 65 espèces. 1975	Georeferenced point locations created by Roeland Kindt (ICRAF) in centre of 2.5 minutes AFRICLIM grid cells
Acacia macrostachya	-1.14583	12.7708	Terrible tree species distribution map - georeferenced in Google Earth by Tor-Gunnar Vagen (ICRAF)	Terrible PB. Atlas de la Haute-Volta. Arbres et arbustes. Carte de répartition et de présence de 65 espèces. 1975	Georeferenced point locations created by Roeland Kindt (ICRAF) in centre of 2.5 minutes AFRICLIM grid cells
Acacia macrostachya	-1.1875	12.6875	Terrible tree species distribution map - georeferenced in Google Earth by Tor-Gunnar Vagen (ICRAF)	Terrible PB. Atlas de la Haute-Volta. Arbres et arbustes. Carte de répartition et de présence de 65 espèces. 1975	Georeferenced point locations created by Roeland Kindt (ICRAF) in centre of 2.5 minutes AFRICLIM grid cells
Acacia macrostachya	-1.5625	12.3958	Terrible tree species distribution map - georeferenced in Google Earth by Tor-Gunnar Vagen (ICRAF)	Terrible PB. Atlas de la Haute-Volta. Arbres et arbustes. Carte de répartition et de présence de 65 espèces. 1975	Georeferenced point locations created by Roeland Kindt (ICRAF) in centre of 2.5 minutes AFRICLIM grid cells
Acacia macrostachya	-1.52083	12.3958	Terrible tree species distribution map - georeferenced in Google Earth by Tor-Gunnar Vagen (ICRAF)	Terrible PB. Atlas de la Haute-Volta. Arbres et arbustes. Carte de répartition et de présence de 65 espèces. 1975	Georeferenced point locations created by Roeland Kindt (ICRAF) in centre of 2.5 minutes AFRICLIM grid cells
Acacia macrostachya	-1.60417	11.7708	Terrible tree species distribution map - georeferenced in Google Earth by Tor-Gunnar Vagen (ICRAF)	Terrible PB. Atlas de la Haute-Volta. Arbres et arbustes. Carte de répartition et de présence de 65 espèces. 1975	Georeferenced point locations created by Roeland Kindt (ICRAF) in centre of 2.5 minutes AFRICLIM grid cells
Acacia macrostachya	-1.60417	11.7292	Terrible tree species distribution map - georeferenced in Google Earth by Tor-Gunnar Vagen (ICRAF)	Terrible PB. Atlas de la Haute-Volta. Arbres et arbustes. Carte de répartition et de présence de 65 espèces. 1975	Georeferenced point locations created by Roeland Kindt (ICRAF) in centre of 2.5 minutes AFRICLIM grid cells
Acacia macrostachya	-1.6875	11.6458	Terrible tree species distribution map - georeferenced in Google Earth by Tor-Gunnar Vagen (ICRAF)	Terrible PB. Atlas de la Haute-Volta. Arbres et arbustes. Carte de répartition et de présence de 65 espèces. 1975	Georeferenced point locations created by Roeland Kindt (ICRAF) in centre of 2.5 minutes AFRICLIM grid cells
Acacia macrostachya	-1.5625	11.8542	Terrible tree species distribution map - georeferenced in Google Earth by Tor-Gunnar Vagen (ICRAF)	Terrible PB. Atlas de la Haute-Volta. Arbres et arbustes. Carte de répartition et de présence de 65 espèces. 1975	Georeferenced point locations created by Roeland Kindt (ICRAF) in centre of 2.5 minutes AFRICLIM grid cells
Acacia macrostachya	-2.1875	11.8958	Terrible tree species distribution map - georeferenced in Google Earth by Tor-Gunnar Vagen (ICRAF)	Terrible PB. Atlas de la Haute-Volta. Arbres et arbustes. Carte de répartition et de présence de 65 espèces. 1975	Georeferenced point locations created by Roeland Kindt (ICRAF) in centre of 2.5 minutes AFRICLIM grid cells
Acacia macrostachya	-2.52083	11.9792	Terrible tree species distribution map - georeferenced in Google Earth by Tor-Gunnar Vagen (ICRAF)	Terrible PB. Atlas de la Haute-Volta. Arbres et arbustes. Carte de répartition et de présence de 65 espèces. 1975	Georeferenced point locations created by Roeland Kindt (ICRAF) in centre of 2.5 minutes AFRICLIM grid cells
Acacia macrostachya	-2.27083	12.0208	Terrible tree species distribution map - georeferenced in Google Earth by Tor-Gunnar Vagen (ICRAF)	Terrible PB. Atlas de la Haute-Volta. Arbres et arbustes. Carte de répartition et de présence de 65 espèces. 1975	Georeferenced point locations created by Roeland Kindt (ICRAF) in centre of 2.5 minutes AFRICLIM grid cells
Acacia macrostachya	-1.77083	12.5208	Terrible tree species distribution map - georeferenced in Google Earth by Tor-Gunnar Vagen (ICRAF)	Terrible PB. Atlas de la Haute-Volta. Arbres et arbustes. Carte de répartition et de présence de 65 espèces. 1975	Georeferenced point locations created by Roeland Kindt (ICRAF) in centre of 2.5 minutes AFRICLIM grid cells
Acacia macrostachya	-1.8125	12.5625	Terrible tree species distribution map - georeferenced in Google Earth by Tor-Gunnar Vagen (ICRAF)	Terrible PB. Atlas de la Haute-Volta. Arbres et arbustes. Carte de répartition et de présence de 65 espèces. 1975	Georeferenced point locations created by Roeland Kindt (ICRAF) in centre of 2.5 minutes AFRICLIM grid cells
Acacia macrostachya	-1.85417	12.6458	Terrible tree species distribution map - georeferenced in Google Earth by Tor-Gunnar Vagen (ICRAF)	Terrible PB. Atlas de la Haute-Volta. Arbres et arbustes. Carte de répartition et de présence de 65 espèces. 1975	Georeferenced point locations created by Roeland Kindt (ICRAF) in centre of 2.5 minutes AFRICLIM grid cells
Acacia macrostachya	-1.52083	12.8125	Terrible tree species distribution map - georeferenced in Google Earth by Tor-Gunnar Vagen (ICRAF)	Terrible PB. Atlas de la Haute-Volta. Arbres et arbustes. Carte de répartition et de présence de 65 espèces. 1975	Georeferenced point locations created by Roeland Kindt (ICRAF) in centre of 2.5 minutes AFRICLIM grid cells
Acacia macrostachya	-1.47917	12.8958	Terrible tree species distribution map - georeferenced in Google Earth by Tor-Gunnar Vagen (ICRAF)	Terrible PB. Atlas de la Haute-Volta. Arbres et arbustes. Carte de répartition et de présence de 65 espèces. 1975	Georeferenced point locations created by Roeland Kindt (ICRAF) in centre of 2.5 minutes AFRICLIM grid cells
Acacia macrostachya	-1.47917	12.9375	Terrible tree species distribution map - georeferenced in Google Earth by Tor-Gunnar Vagen (ICRAF)	Terrible PB. Atlas de la Haute-Volta. Arbres et arbustes. Carte de répartition et de présence de 65 espèces. 1975	Georeferenced point locations created by Roeland Kindt (ICRAF) in centre of 2.5 minutes AFRICLIM grid cells
Acacia macrostachya	-1.52083	12.9792	Terrible tree species distribution map - georeferenced in Google Earth by Tor-Gunnar Vagen (ICRAF)	Terrible PB. Atlas de la Haute-Volta. Arbres et arbustes. Carte de répartition et de présence de 65 espèces. 1975	Georeferenced point locations created by Roeland Kindt (ICRAF) in centre of 2.5 minutes AFRICLIM grid cells
Acacia macrostachya	-1.6875	13.3125	Terrible tree species distribution map - georeferenced in Google Earth by Tor-Gunnar Vagen (ICRAF)	Terrible PB. Atlas de la Haute-Volta. Arbres et arbustes. Carte de répartition et de présence de 65 espèces. 1975	Georeferenced point locations created by Roeland Kindt (ICRAF) in centre of 2.5 minutes AFRICLIM grid cells
Acacia macrostachya	-1.77083	13.3125	Terrible tree species distribution map - georeferenced in Google Earth by Tor-Gunnar Vagen (ICRAF)	Terrible PB. Atlas de la Haute-Volta. Arbres et arbustes. Carte de répartition et de présence de 65 espèces. 1975	Georeferenced point locations created by Roeland Kindt (ICRAF) in centre of 2.5 minutes AFRICLIM grid cells
Acacia macrostachya	-1.89583	13.3958	Terrible tree species distribution map - georeferenced in Google Earth by Tor-Gunnar Vagen (ICRAF)	Terrible PB. Atlas de la Haute-Volta. Arbres et arbustes. Carte de répartition et de présence de 65 espèces. 1975	Georeferenced point locations created by Roeland Kindt (ICRAF) in centre of 2.5 minutes AFRICLIM grid cells
Acacia macrostachya	-2.02083	13.4375	Terrible tree species distribution map - georeferenced in Google Earth by Tor-Gunnar Vagen (ICRAF)	Terrible PB. Atlas de la Haute-Volta. Arbres et arbustes. Carte de répartition et de présence de 65 espèces. 1975	Georeferenced point locations created by Roeland Kindt (ICRAF) in centre of 2.5 minutes AFRICLIM grid cells
Acacia macrostachya	-2.0625	13.4792	Terrible tree species distribution map - georeferenced in Google Earth by Tor-Gunnar Vagen (ICRAF)	Terrible PB. Atlas de la Haute-Volta. Arbres et arbustes. Carte de répartition et de présence de 65 espèces. 1975	Georeferenced point locations created by Roeland Kindt (ICRAF) in centre of 2.5 minutes AFRICLIM grid cells
Acacia macrostachya	-2.3125	13.5208	Terrible tree species distribution map - georeferenced in Google Earth by Tor-Gunnar Vagen (ICRAF)	Terrible PB. Atlas de la Haute-Volta. Arbres et arbustes. Carte de répartition et de présence de 65 espèces. 1975	Georeferenced point locations created by Roeland Kindt (ICRAF) in centre of 2.5 minutes AFRICLIM grid cells
Acacia macrostachya	-2.02083	13.8125	Terrible tree species distribution map - georeferenced in Google Earth by Tor-Gunnar Vagen (ICRAF)	Terrible PB. Atlas de la Haute-Volta. Arbres et arbustes. Carte de répartition et de présence de 65 espèces. 1975	Georeferenced point locations created by Roeland Kindt (ICRAF) in centre of 2.5 minutes AFRICLIM grid cells
Acacia macrostachya	-2.3125	13.6458	Terrible tree species distribution map - georeferenced in Google Earth by Tor-Gunnar Vagen (ICRAF)	Terrible PB. Atlas de la Haute-Volta. Arbres et arbustes. Carte de répartition et de présence de 65 espèces. 1975	Georeferenced point locations created by Roeland Kindt (ICRAF) in centre of 2.5 minutes AFRICLIM grid cells
Acacia macrostachya	-2.6875	13.8125	Terrible tree species distribution map - georeferenced in Google Earth by Tor-Gunnar Vagen (ICRAF)	Terrible PB. Atlas de la Haute-Volta. Arbres et arbustes. Carte de répartition et de présence de 65 espèces. 1975	Georeferenced point locations created by Roeland Kindt (ICRAF) in centre of 2.5 minutes AFRICLIM grid cells
Acacia macrostachya	-2.5625	13.6875	Terrible tree species distribution map - georeferenced in Google Earth by Tor-Gunnar Vagen (ICRAF)	Terrible PB. Atlas de la Haute-Volta. Arbres et arbustes. Carte de répartition et de présence de 65 espèces. 1975	Georeferenced point locations created by Roeland Kindt (ICRAF) in centre of 2.5 minutes AFRICLIM grid cells
Acacia macrostachya	-2.39583	13.4792	Terrible tree species distribution map - georeferenced in Google Earth by Tor-Gunnar Vagen (ICRAF)	Terrible PB. Atlas de la Haute-Volta. Arbres et arbustes. Carte de répartition et de présence de 65 espèces. 1975	Georeferenced point locations created by Roeland Kindt (ICRAF) in centre of 2.5 minutes AFRICLIM grid cells
Acacia macrostachya	-2.35417	13.3958	Terrible tree species distribution map - georeferenced in Google Earth by Tor-Gunnar Vagen (ICRAF)	Terrible PB. Atlas de la Haute-Volta. Arbres et arbustes. Carte de répartition et de présence de 65 espèces. 1975	Georeferenced point locations created by Roeland Kindt (ICRAF) in centre of 2.5 minutes AFRICLIM grid cells
Acacia macrostachya	-1.97917	12.7708	Terrible tree species distribution map - georeferenced in Google Earth by Tor-Gunnar Vagen (ICRAF)	Terrible PB. Atlas de la Haute-Volta. Arbres et arbustes. Carte de répartition et de présence de 65 espèces. 1975	Georeferenced point locations created by Roeland Kindt (ICRAF) in centre of 2.5 minutes AFRICLIM grid cells
Acacia macrostachya	-2.52083	13.4375	Terrible tree species distribution map - georeferenced in Google Earth by Tor-Gunnar Vagen (ICRAF)	Terrible PB. Atlas de la Haute-Volta. Arbres et arbustes. Carte de répartition et de présence de 65 espèces. 1975	Georeferenced point locations created by Roeland Kindt (ICRAF) in centre of 2.5 minutes AFRICLIM grid cells
Acacia macrostachya	-2.64583	13.3542	Terrible tree species distribution map - georeferenced in Google Earth by Tor-Gunnar Vagen (ICRAF)	Terrible PB. Atlas de la Haute-Volta. Arbres et arbustes. Carte de répartition et de présence de 65 espèces. 1975	Georeferenced point locations created by Roeland Kindt (ICRAF) in centre of 2.5 minutes AFRICLIM grid cells
Acacia macrostachya	-2.35417	13.2292	Terrible tree species distribution map - georeferenced in Google Earth by Tor-Gunnar Vagen (ICRAF)	Terrible PB. Atlas de la Haute-Volta. Arbres et arbustes. Carte de répartition et de présence de 65 espèces. 1975	Georeferenced point locations created by Roeland Kindt (ICRAF) in centre of 2.5 minutes AFRICLIM grid cells
Acacia macrostachya	-2.3125	13.0625	Terrible tree species distribution map - georeferenced in Google Earth by Tor-Gunnar Vagen (ICRAF)	Terrible PB. Atlas de la Haute-Volta. Arbres et arbustes. Carte de répartition et de présence de 65 espèces. 1975	Georeferenced point locations created by Roeland Kindt (ICRAF) in centre of 2.5 minutes AFRICLIM grid cells
Acacia macrostachya	-2.27083	12.9792	Terrible tree species distribution map - georeferenced in Google Earth by Tor-Gunnar Vagen (ICRAF)	Terrible PB. Atlas de la Haute-Volta. Arbres et arbustes. Carte de répartition et de présence de 65 espèces. 1975	Georeferenced point locations created by Roeland Kindt (ICRAF) in centre of 2.5 minutes AFRICLIM grid cells
Acacia macrostachya	-2.72917	12.9375	Terrible tree species distribution map - georeferenced in Google Earth by Tor-Gunnar Vagen (ICRAF)	Terrible PB. Atlas de la Haute-Volta. Arbres et arbustes. Carte de répartition et de présence de 65 espèces. 1975	Georeferenced point locations created by Roeland Kindt (ICRAF) in centre of 2.5 minutes AFRICLIM grid cells
Acacia macrostachya	-2.60417	12.5208	Terrible tree species distribution map - georeferenced in Google Earth by Tor-Gunnar Vagen (ICRAF)	Terrible PB. Atlas de la Haute-Volta. Arbres et arbustes. Carte de répartition et de présence de 65 espèces. 1975	Georeferenced point locations created by Roeland Kindt (ICRAF) in centre of 2.5 minutes AFRICLIM grid cells
Acacia macrostachya	-2.52083	12.3958	Terrible tree species distribution map - georeferenced in Google Earth by Tor-Gunnar Vagen (ICRAF)	Terrible PB. Atlas de la Haute-Volta. Arbres et arbustes. Carte de répartition et de présence de 65 espèces. 1975	Georeferenced point locations created by Roeland Kindt (ICRAF) in centre of 2.5 minutes AFRICLIM grid cells
Acacia macrostachya	-2.39583	12.2708	Terrible tree species distribution map - georeferenced in Google Earth by Tor-Gunnar Vagen (ICRAF)	Terrible PB. Atlas de la Haute-Volta. Arbres et arbustes. Carte de répartition et de présence de 65 espèces. 1975	Georeferenced point locations created by Roeland Kindt (ICRAF) in centre of 2.5 minutes AFRICLIM grid cells
Acacia macrostachya	-2.52083	12.1875	Terrible tree species distribution map - georeferenced in Google Earth by Tor-Gunnar Vagen (ICRAF)	Terrible PB. Atlas de la Haute-Volta. Arbres et arbustes. Carte de répartition et de présence de 65 espèces. 1975	Georeferenced point locations created by Roeland Kindt (ICRAF) in centre of 2.5 minutes AFRICLIM grid cells
Acacia macrostachya	-2.02083	12.1875	Terrible tree species distribution map - georeferenced in Google Earth by Tor-Gunnar Vagen (ICRAF)	Terrible PB. Atlas de la Haute-Volta. Arbres et arbustes. Carte de répartition et de présence de 65 espèces. 1975	Georeferenced point locations created by Roeland Kindt (ICRAF) in centre of 2.5 minutes AFRICLIM grid cells
Acacia macrostachya	-2.22917	12.1042	Terrible tree species distribution map - georeferenced in Google Earth by Tor-Gunnar Vagen (ICRAF)	Terrible PB. Atlas de la Haute-Volta. Arbres et arbustes. Carte de répartition et de présence de 65 espèces. 1975	Georeferenced point locations created by Roeland Kindt (ICRAF) in centre of 2.5 minutes AFRICLIM grid cells
Acacia macrostachya	-2.97917	11.8958	Terrible tree species distribution map - georeferenced in Google Earth by Tor-Gunnar Vagen (ICRAF)	Terrible PB. Atlas de la Haute-Volta. Arbres et arbustes. Carte de répartition et de présence de 65 espèces. 1975	Georeferenced point locations created by Roeland Kindt (ICRAF) in centre of 2.5 minutes AFRICLIM grid cells
Acacia macrostachya	-2.72917	11.6875	Terrible tree species distribution map - georeferenced in Google Earth by Tor-Gunnar Vagen (ICRAF)	Terrible PB. Atlas de la Haute-Volta. Arbres et arbustes. Carte de répartition et de présence de 65 espèces. 1975	Georeferenced point locations created by Roeland Kindt (ICRAF) in centre of 2.5 minutes AFRICLIM grid cells
Acacia macrostachya	-2.97917	11.8125	Terrible tree species distribution map - georeferenced in Google Earth by Tor-Gunnar Vagen (ICRAF)	Terrible PB. Atlas de la Haute-Volta. Arbres et arbustes. Carte de répartition et de présence de 65 espèces. 1975	Georeferenced point locations created by Roeland Kindt (ICRAF) in centre of 2.5 minutes AFRICLIM grid cells
Acacia macrostachya	-2.89583	11.7708	Terrible tree species distribution map - georeferenced in Google Earth by Tor-Gunnar Vagen (ICRAF)	Terrible PB. Atlas de la Haute-Volta. Arbres et arbustes. Carte de répartition et de présence de 65 espèces. 1975	Georeferenced point locations created by Roeland Kindt (ICRAF) in centre of 2.5 minutes AFRICLIM grid cells
Acacia macrostachya	-3.89583	13.1458	Terrible tree species distribution map - georeferenced in Google Earth by Tor-Gunnar Vagen (ICRAF)	Terrible PB. Atlas de la Haute-Volta. Arbres et arbustes. Carte de répartition et de présence de 65 espèces. 1975	Georeferenced point locations created by Roeland Kindt (ICRAF) in centre of 2.5 minutes AFRICLIM grid cells
Acacia macrostachya	-4.1875	13.1042	Terrible tree species distribution map - georeferenced in Google Earth by Tor-Gunnar Vagen (ICRAF)	Terrible PB. Atlas de la Haute-Volta. Arbres et arbustes. Carte de répartition et de présence de 65 espèces. 1975	Georeferenced point locations created by Roeland Kindt (ICRAF) in centre of 2.5 minutes AFRICLIM grid cells
Acacia macrostachya	-3.85417	12.8542	Terrible tree species distribution map - georeferenced in Google Earth by Tor-Gunnar Vagen (ICRAF)	Terrible PB. Atlas de la Haute-Volta. Arbres et arbustes. Carte de répartition et de présence de 65 espèces. 1975	Georeferenced point locations created by Roeland Kindt (ICRAF) in centre of 2.5 minutes AFRICLIM grid cells
Acacia macrostachya	-3.6875	12.8125	Terrible tree species distribution map - georeferenced in Google Earth by Tor-Gunnar Vagen (ICRAF)	Terrible PB. Atlas de la Haute-Volta. Arbres et arbustes. Carte de répartition et de présence de 65 espèces. 1975	Georeferenced point locations created by Roeland Kindt (ICRAF) in centre of 2.5 minutes AFRICLIM grid cells
Acacia macrostachya	-3.60417	12.8125	Terrible tree species distribution map - georeferenced in Google Earth by Tor-Gunnar Vagen (ICRAF)	Terrible PB. Atlas de la Haute-Volta. Arbres et arbustes. Carte de répartition et de présence de 65 espèces. 1975	Georeferenced point locations created by Roeland Kindt (ICRAF) in centre of 2.5 minutes AFRICLIM grid cells
Acacia macrostachya	-3.89583	12.6875	Terrible tree species distribution map - georeferenced in Google Earth by Tor-Gunnar Vagen (ICRAF)	Terrible PB. Atlas de la Haute-Volta. Arbres et arbustes. Carte de répartition et de présence de 65 espèces. 1975	Georeferenced point locations created by Roeland Kindt (ICRAF) in centre of 2.5 minutes AFRICLIM grid cells
Acacia macrostachya	-3.8125	12.5625	Terrible tree species distribution map - georeferenced in Google Earth by Tor-Gunnar Vagen (ICRAF)	Terrible PB. Atlas de la Haute-Volta. Arbres et arbustes. Carte de répartition et de présence de 65 espèces. 1975	Georeferenced point locations created by Roeland Kindt (ICRAF) in centre of 2.5 minutes AFRICLIM grid cells
Acacia macrostachya	-3.64583	12.5625	Terrible tree species distribution map - georeferenced in Google Earth by Tor-Gunnar Vagen (ICRAF)	Terrible PB. Atlas de la Haute-Volta. Arbres et arbustes. Carte de répartition et de présence de 65 espèces. 1975	Georeferenced point locations created by Roeland Kindt (ICRAF) in centre of 2.5 minutes AFRICLIM grid cells
Acacia macrostachya	-4.3125	12.3542	Terrible tree species distribution map - georeferenced in Google Earth by Tor-Gunnar Vagen (ICRAF)	Terrible PB. Atlas de la Haute-Volta. Arbres et arbustes. Carte de répartition et de présence de 65 espèces. 1975	Georeferenced point locations created by Roeland Kindt (ICRAF) in centre of 2.5 minutes AFRICLIM grid cells
Acacia macrostachya	-4.1875	12.3542	Terrible tree species distribution map - georeferenced in Google Earth by Tor-Gunnar Vagen (ICRAF)	Terrible PB. Atlas de la Haute-Volta. Arbres et arbustes. Carte de répartition et de présence de 65 espèces. 1975	Georeferenced point locations created by Roeland Kindt (ICRAF) in centre of 2.5 minutes AFRICLIM grid cells
Acacia macrostachya	-4.14583	12.3542	Terrible tree species distribution map - georeferenced in Google Earth by Tor-Gunnar Vagen (ICRAF)	Terrible PB. Atlas de la Haute-Volta. Arbres et arbustes. Carte de répartition et de présence de 65 espèces. 1975	Georeferenced point locations created by Roeland Kindt (ICRAF) in centre of 2.5 minutes AFRICLIM grid cells
Acacia macrostachya	-4.10417	12.2708	Terrible tree species distribution map - georeferenced in Google Earth by Tor-Gunnar Vagen (ICRAF)	Terrible PB. Atlas de la Haute-Volta. Arbres et arbustes. Carte de répartition et de présence de 65 espèces. 1975	Georeferenced point locations created by Roeland Kindt (ICRAF) in centre of 2.5 minutes AFRICLIM grid cells
Acacia macrostachya	-4.64583	12.0625	Terrible tree species distribution map - georeferenced in Google Earth by Tor-Gunnar Vagen (ICRAF)	Terrible PB. Atlas de la Haute-Volta. Arbres et arbustes. Carte de répartition et de présence de 65 espèces. 1975	Georeferenced point locations created by Roeland Kindt (ICRAF) in centre of 2.5 minutes AFRICLIM grid cells
Acacia macrostachya	-4.5625	11.9792	Terrible tree species distribution map - georeferenced in Google Earth by Tor-Gunnar Vagen (ICRAF)	Terrible PB. Atlas de la Haute-Volta. Arbres et arbustes. Carte de répartition et de présence de 65 espèces. 1975	Georeferenced point locations created by Roeland Kindt (ICRAF) in centre of 2.5 minutes AFRICLIM grid cells
Acacia macrostachya	-4.5625	11.9375	Terrible tree species distribution map - georeferenced in Google Earth by Tor-Gunnar Vagen (ICRAF)	Terrible PB. Atlas de la Haute-Volta. Arbres et arbustes. Carte de répartition et de présence de 65 espèces. 1975	Georeferenced point locations created by Roeland Kindt (ICRAF) in centre of 2.5 minutes AFRICLIM grid cells
Acacia macrostachya	-5.0625	11.9375	Terrible tree species distribution map - georeferenced in Google Earth by Tor-Gunnar Vagen (ICRAF)	Terrible PB. Atlas de la Haute-Volta. Arbres et arbustes. Carte de répartition et de présence de 65 espèces. 1975	Georeferenced point locations created by Roeland Kindt (ICRAF) in centre of 2.5 minutes AFRICLIM grid cells
Acacia macrostachya	-4.89583	11.8125	Terrible tree species distribution map - georeferenced in Google Earth by Tor-Gunnar Vagen (ICRAF)	Terrible PB. Atlas de la Haute-Volta. Arbres et arbustes. Carte de répartition et de présence de 65 espèces. 1975	Georeferenced point locations created by Roeland Kindt (ICRAF) in centre of 2.5 minutes AFRICLIM grid cells
Acacia macrostachya	-4.9375	11.2292	Terrible tree species distribution map - georeferenced in Google Earth by Tor-Gunnar Vagen (ICRAF)	Terrible PB. Atlas de la Haute-Volta. Arbres et arbustes. Carte de répartition et de présence de 65 espèces. 1975	Georeferenced point locations created by Roeland Kindt (ICRAF) in centre of 2.5 minutes AFRICLIM grid cells
Acacia macrostachya	-4.9375	11.1458	Terrible tree species distribution map - georeferenced in Google Earth by Tor-Gunnar Vagen (ICRAF)	Terrible PB. Atlas de la Haute-Volta. Arbres et arbustes. Carte de répartition et de présence de 65 espèces. 1975	Georeferenced point locations created by Roeland Kindt (ICRAF) in centre of 2.5 minutes AFRICLIM grid cells
Acacia macrostachya	-4.9375	11.1042	Terrible tree species distribution map - georeferenced in Google Earth by Tor-Gunnar Vagen (ICRAF)	Terrible PB. Atlas de la Haute-Volta. Arbres et arbustes. Carte de répartition et de présence de 65 espèces. 1975	Georeferenced point locations created by Roeland Kindt (ICRAF) in centre of 2.5 minutes AFRICLIM grid cells
Acacia macrostachya	-5.0625	11.0208	Terrible tree species distribution map - georeferenced in Google Earth by Tor-Gunnar Vagen (ICRAF)	Terrible PB. Atlas de la Haute-Volta. Arbres et arbustes. Carte de répartition et de présence de 65 espèces. 1975	Georeferenced point locations created by Roeland Kindt (ICRAF) in centre of 2.5 minutes AFRICLIM grid cells
Acacia macrostachya	-4.9375	11.0625	Terrible tree species distribution map - georeferenced in Google Earth by Tor-Gunnar Vagen (ICRAF)	Terrible PB. Atlas de la Haute-Volta. Arbres et arbustes. Carte de répartition et de présence de 65 espèces. 1975	Georeferenced point locations created by Roeland Kindt (ICRAF) in centre of 2.5 minutes AFRICLIM grid cells
Acacia macrostachya	-5.39583	10.5625	Terrible tree species distribution map - georeferenced in Google Earth by Tor-Gunnar Vagen (ICRAF)	Terrible PB. Atlas de la Haute-Volta. Arbres et arbustes. Carte de répartition et de présence de 65 espèces. 1975	Georeferenced point locations created by Roeland Kindt (ICRAF) in centre of 2.5 minutes AFRICLIM grid cells
Acacia macrostachya	-4.97917	10.3542	Terrible tree species distribution map - georeferenced in Google Earth by Tor-Gunnar Vagen (ICRAF)	Terrible PB. Atlas de la Haute-Volta. Arbres et arbustes. Carte de répartition et de présence de 65 espèces. 1975	Georeferenced point locations created by Roeland Kindt (ICRAF) in centre of 2.5 minutes AFRICLIM grid cells
Acacia macrostachya	-4.6875	10.7708	Terrible tree species distribution map - georeferenced in Google Earth by Tor-Gunnar Vagen (ICRAF)	Terrible PB. Atlas de la Haute-Volta. Arbres et arbustes. Carte de répartition et de présence de 65 espèces. 1975	Georeferenced point locations created by Roeland Kindt (ICRAF) in centre of 2.5 minutes AFRICLIM grid cells
Acacia macrostachya	-3.22917	13.3125	Terrible tree species distribution map - georeferenced in Google Earth by Tor-Gunnar Vagen (ICRAF)	Terrible PB. Atlas de la Haute-Volta. Arbres et arbustes. Carte de répartition et de présence de 65 espèces. 1975	Georeferenced point locations created by Roeland Kindt (ICRAF) in centre of 2.5 minutes AFRICLIM grid cells
Acacia macrostachya	-3.52083	12.8125	Terrible tree species distribution map - georeferenced in Google Earth by Tor-Gunnar Vagen (ICRAF)	Terrible PB. Atlas de la Haute-Volta. Arbres et arbustes. Carte de répartition et de présence de 65 espèces. 1975	Georeferenced point locations created by Roeland Kindt (ICRAF) in centre of 2.5 minutes AFRICLIM grid cells
Acacia macrostachya	-3.47917	12.8125	Terrible tree species distribution map - georeferenced in Google Earth by Tor-Gunnar Vagen (ICRAF)	Terrible PB. Atlas de la Haute-Volta. Arbres et arbustes. Carte de répartition et de présence de 65 espèces. 1975	Georeferenced point locations created by Roeland Kindt (ICRAF) in centre of 2.5 minutes AFRICLIM grid cells
Acacia macrostachya	-3.85417	13.0625	Terrible tree species distribution map - georeferenced in Google Earth by Tor-Gunnar Vagen (ICRAF)	Terrible PB. Atlas de la Haute-Volta. Arbres et arbustes. Carte de répartition et de présence de 65 espèces. 1975	Georeferenced point locations created by Roeland Kindt (ICRAF) in centre of 2.5 minutes AFRICLIM grid cells
Acacia macrostachya	-3.4375	12.7708	Terrible tree species distribution map - georeferenced in Google Earth by Tor-Gunnar Vagen (ICRAF)	Terrible PB. Atlas de la Haute-Volta. Arbres et arbustes. Carte de répartition et de présence de 65 espèces. 1975	Georeferenced point locations created by Roeland Kindt (ICRAF) in centre of 2.5 minutes AFRICLIM grid cells
Acacia macrostachya	-4.10417	12.3958	Terrible tree species distribution map - georeferenced in Google Earth by Tor-Gunnar Vagen (ICRAF)	Terrible PB. Atlas de la Haute-Volta. Arbres et arbustes. Carte de répartition et de présence de 65 espèces. 1975	Georeferenced point locations created by Roeland Kindt (ICRAF) in centre of 2.5 minutes AFRICLIM grid cells
Acacia macrostachya	-3.85417	12.3542	Terrible tree species distribution map - georeferenced in Google Earth by Tor-Gunnar Vagen (ICRAF)	Terrible PB. Atlas de la Haute-Volta. Arbres et arbustes. Carte de répartition et de présence de 65 espèces. 1975	Georeferenced point locations created by Roeland Kindt (ICRAF) in centre of 2.5 minutes AFRICLIM grid cells
Acacia macrostachya	-3.89583	12.2292	Terrible tree species distribution map - georeferenced in Google Earth by Tor-Gunnar Vagen (ICRAF)	Terrible PB. Atlas de la Haute-Volta. Arbres et arbustes. Carte de répartition et de présence de 65 espèces. 1975	Georeferenced point locations created by Roeland Kindt (ICRAF) in centre of 2.5 minutes AFRICLIM grid cells
Acacia macrostachya	-4.14583	12.1042	Terrible tree species distribution map - georeferenced in Google Earth by Tor-Gunnar Vagen (ICRAF)	Terrible PB. Atlas de la Haute-Volta. Arbres et arbustes. Carte de répartition et de présence de 65 espèces. 1975	Georeferenced point locations created by Roeland Kindt (ICRAF) in centre of 2.5 minutes AFRICLIM grid cells
Acacia macrostachya	-4.35417	11.9792	Terrible tree species distribution map - georeferenced in Google Earth by Tor-Gunnar Vagen (ICRAF)	Terrible PB. Atlas de la Haute-Volta. Arbres et arbustes. Carte de répartition et de présence de 65 espèces. 1975	Georeferenced point locations created by Roeland Kindt (ICRAF) in centre of 2.5 minutes AFRICLIM grid cells
Acacia macrostachya	-4.4375	11.8125	Terrible tree species distribution map - georeferenced in Google Earth by Tor-Gunnar Vagen (ICRAF)	Terrible PB. Atlas de la Haute-Volta. Arbres et arbustes. Carte de répartition et de présence de 65 espèces. 1975	Georeferenced point locations created by Roeland Kindt (ICRAF) in centre of 2.5 minutes AFRICLIM grid cells
Acacia macrostachya	-4.35417	11.1875	Terrible tree species distribution map - georeferenced in Google Earth by Tor-Gunnar Vagen (ICRAF)	Terrible PB. Atlas de la Haute-Volta. Arbres et arbustes. Carte de répartition et de présence de 65 espèces. 1975	Georeferenced point locations created by Roeland Kindt (ICRAF) in centre of 2.5 minutes AFRICLIM grid cells
Acacia macrostachya	-4.47917	11.2292	Terrible tree species distribution map - georeferenced in Google Earth by Tor-Gunnar Vagen (ICRAF)	Terrible PB. Atlas de la Haute-Volta. Arbres et arbustes. Carte de répartition et de présence de 65 espèces. 1975	Georeferenced point locations created by Roeland Kindt (ICRAF) in centre of 2.5 minutes AFRICLIM grid cells
Acacia macrostachya	-4.39583	11.1875	Terrible tree species distribution map - georeferenced in Google Earth by Tor-Gunnar Vagen (ICRAF)	Terrible PB. Atlas de la Haute-Volta. Arbres et arbustes. Carte de répartition et de présence de 65 espèces. 1975	Georeferenced point locations created by Roeland Kindt (ICRAF) in centre of 2.5 minutes AFRICLIM grid cells
Acacia macrostachya	-4.77083	11.0625	Terrible tree species distribution map - georeferenced in Google Earth by Tor-Gunnar Vagen (ICRAF)	Terrible PB. Atlas de la Haute-Volta. Arbres et arbustes. Carte de répartition et de présence de 65 espèces. 1975	Georeferenced point locations created by Roeland Kindt (ICRAF) in centre of 2.5 minutes AFRICLIM grid cells
Acacia macrostachya	-3.85417	10.3958	Terrible tree species distribution map - georeferenced in Google Earth by Tor-Gunnar Vagen (ICRAF)	Terrible PB. Atlas de la Haute-Volta. Arbres et arbustes. Carte de répartition et de présence de 65 espèces. 1975	Georeferenced point locations created by Roeland Kindt (ICRAF) in centre of 2.5 minutes AFRICLIM grid cells
Acacia macrostachya	-3.22917	10.6042	Terrible tree species distribution map - georeferenced in Google Earth by Tor-Gunnar Vagen (ICRAF)	Terrible PB. Atlas de la Haute-Volta. Arbres et arbustes. Carte de répartition et de présence de 65 espèces. 1975	Georeferenced point locations created by Roeland Kindt (ICRAF) in centre of 2.5 minutes AFRICLIM grid cells
Acacia macrostachya	-3.3125	10.2292	Terrible tree species distribution map - georeferenced in Google Earth by Tor-Gunnar Vagen (ICRAF)	Terrible PB. Atlas de la Haute-Volta. Arbres et arbustes. Carte de répartition et de présence de 65 espèces. 1975	Georeferenced point locations created by Roeland Kindt (ICRAF) in centre of 2.5 minutes AFRICLIM grid cells
Acacia macrostachya	-3.64583	10.9375	Terrible tree species distribution map - georeferenced in Google Earth by Tor-Gunnar Vagen (ICRAF)	Terrible PB. Atlas de la Haute-Volta. Arbres et arbustes. Carte de répartition et de présence de 65 espèces. 1975	Georeferenced point locations created by Roeland Kindt (ICRAF) in centre of 2.5 minutes AFRICLIM grid cells
Acacia macrostachya	-2.89583	11.0208	Terrible tree species distribution map - georeferenced in Google Earth by Tor-Gunnar Vagen (ICRAF)	Terrible PB. Atlas de la Haute-Volta. Arbres et arbustes. Carte de répartition et de présence de 65 espèces. 1975	Georeferenced point locations created by Roeland Kindt (ICRAF) in centre of 2.5 minutes AFRICLIM grid cells
Acacia macrostachya	-3.64583	11.3125	Terrible tree species distribution map - georeferenced in Google Earth by Tor-Gunnar Vagen (ICRAF)	Terrible PB. Atlas de la Haute-Volta. Arbres et arbustes. Carte de répartition et de présence de 65 espèces. 1975	Georeferenced point locations created by Roeland Kindt (ICRAF) in centre of 2.5 minutes AFRICLIM grid cells
Acacia macrostachya	-3.14583	13.2292	Terrible tree species distribution map - georeferenced in Google Earth by Tor-Gunnar Vagen (ICRAF)	Terrible PB. Atlas de la Haute-Volta. Arbres et arbustes. Carte de répartition et de présence de 65 espèces. 1975	Georeferenced point locations created by Roeland Kindt (ICRAF) in centre of 2.5 minutes AFRICLIM grid cells
Acacia macrostachya	-2.89583	13.1042	Terrible tree species distribution map - georeferenced in Google Earth by Tor-Gunnar Vagen (ICRAF)	Terrible PB. Atlas de la Haute-Volta. Arbres et arbustes. Carte de répartition et de présence de 65 espèces. 1975	Georeferenced point locations created by Roeland Kindt (ICRAF) in centre of 2.5 minutes AFRICLIM grid cells
Acacia macrostachya	-3.10417	13.0208	Terrible tree species distribution map - georeferenced in Google Earth by Tor-Gunnar Vagen (ICRAF)	Terrible PB. Atlas de la Haute-Volta. Arbres et arbustes. Carte de répartition et de présence de 65 espèces. 1975	Georeferenced point locations created by Roeland Kindt (ICRAF) in centre of 2.5 minutes AFRICLIM grid cells
Acacia macrostachya	-3.1875	12.7292	Terrible tree species distribution map - georeferenced in Google Earth by Tor-Gunnar Vagen (ICRAF)	Terrible PB. Atlas de la Haute-Volta. Arbres et arbustes. Carte de répartition et de présence de 65 espèces. 1975	Georeferenced point locations created by Roeland Kindt (ICRAF) in centre of 2.5 minutes AFRICLIM grid cells
Acacia macrostachya	-3.22917	12.6458	Terrible tree species distribution map - georeferenced in Google Earth by Tor-Gunnar Vagen (ICRAF)	Terrible PB. Atlas de la Haute-Volta. Arbres et arbustes. Carte de répartition et de présence de 65 espèces. 1975	Georeferenced point locations created by Roeland Kindt (ICRAF) in centre of 2.5 minutes AFRICLIM grid cells
Acacia macrostachya	-3.39583	12.5208	Terrible tree species distribution map - georeferenced in Google Earth by Tor-Gunnar Vagen (ICRAF)	Terrible PB. Atlas de la Haute-Volta. Arbres et arbustes. Carte de répartition et de présence de 65 espèces. 1975	Georeferenced point locations created by Roeland Kindt (ICRAF) in centre of 2.5 minutes AFRICLIM grid cells
Acacia macrostachya	-3.3125	12.3542	Terrible tree species distribution map - georeferenced in Google Earth by Tor-Gunnar Vagen (ICRAF)	Terrible PB. Atlas de la Haute-Volta. Arbres et arbustes. Carte de répartition et de présence de 65 espèces. 1975	Georeferenced point locations created by Roeland Kindt (ICRAF) in centre of 2.5 minutes AFRICLIM grid cells
Acacia macrostachya	-3.27083	12.3542	Terrible tree species distribution map - georeferenced in Google Earth by Tor-Gunnar Vagen (ICRAF)	Terrible PB. Atlas de la Haute-Volta. Arbres et arbustes. Carte de répartition et de présence de 65 espèces. 1975	Georeferenced point locations created by Roeland Kindt (ICRAF) in centre of 2.5 minutes AFRICLIM grid cells
Acacia macrostachya	-3.27083	12.1042	Terrible tree species distribution map - georeferenced in Google Earth by Tor-Gunnar Vagen (ICRAF)	Terrible PB. Atlas de la Haute-Volta. Arbres et arbustes. Carte de répartition et de présence de 65 espèces. 1975	Georeferenced point locations created by Roeland Kindt (ICRAF) in centre of 2.5 minutes AFRICLIM grid cells
Acacia macrostachya	-3.39583	12.0625	Terrible tree species distribution map - georeferenced in Google Earth by Tor-Gunnar Vagen (ICRAF)	Terrible PB. Atlas de la Haute-Volta. Arbres et arbustes. Carte de répartition et de présence de 65 espèces. 1975	Georeferenced point locations created by Roeland Kindt (ICRAF) in centre of 2.5 minutes AFRICLIM grid cells
Acacia macrostachya	-0.354167	12.7292	Terrible tree species distribution map - georeferenced in Google Earth by Tor-Gunnar Vagen (ICRAF)	Terrible PB. Atlas de la Haute-Volta. Arbres et arbustes. Carte de répartition et de présence de 65 espèces. 1975	Georeferenced point locations created by Roeland Kindt (ICRAF) in centre of 2.5 minutes AFRICLIM grid cells
Acacia macrostachya	-2.60417	12.1458	Terrible tree species distribution map - georeferenced in Google Earth by Tor-Gunnar Vagen (ICRAF)	Terrible PB. Atlas de la Haute-Volta. Arbres et arbustes. Carte de répartition et de présence de 65 espèces. 1975	Georeferenced point locations created by Roeland Kindt (ICRAF) in centre of 2.5 minutes AFRICLIM grid cells
Acacia macrostachya	-2.8125	12.1875	Terrible tree species distribution map - georeferenced in Google Earth by Tor-Gunnar Vagen (ICRAF)	Terrible PB. Atlas de la Haute-Volta. Arbres et arbustes. Carte de répartition et de présence de 65 espèces. 1975	Georeferenced point locations created by Roeland Kindt (ICRAF) in centre of 2.5 minutes AFRICLIM grid cells
Acacia macrostachya	-3.02083	13.3542	Terrible tree species distribution map - georeferenced in Google Earth by Tor-Gunnar Vagen (ICRAF)	Terrible PB. Atlas de la Haute-Volta. Arbres et arbustes. Carte de répartition et de présence de 65 espèces. 1975	Georeferenced point locations created by Roeland Kindt (ICRAF) in centre of 2.5 minutes AFRICLIM grid cells
Acacia macrostachya	-0.604167	12.2708	Terrible tree species distribution map - georeferenced in Google Earth by Tor-Gunnar Vagen (ICRAF)	Terrible PB. Atlas de la Haute-Volta. Arbres et arbustes. Carte de répartition et de présence de 65 espèces. 1975	Georeferenced point locations created by Roeland Kindt (ICRAF) in centre of 2.5 minutes AFRICLIM grid cells
Acacia macrostachya	0.770833	12.0625	Terrible tree species distribution map - georeferenced in Google Earth by Tor-Gunnar Vagen (ICRAF)	Terrible PB. Atlas de la Haute-Volta. Arbres et arbustes. Carte de répartition et de présence de 65 espèces. 1975	Georeferenced point locations created by Roeland Kindt (ICRAF) in centre of 2.5 minutes AFRICLIM grid cells
Acacia senegal	-0.3	14.366	AAU Herbarium Database	AAU Herbarium Database (access 04/2013) http://www.aubot.dk/search_form.php	freely available data from the Aarhus herbarium
Acacia senegal	-0.266	14.4	AAU Herbarium Database	AAU Herbarium Database (access 04/2013) http://www.aubot.dk/search_form.php	freely available data from the Aarhus herbarium
Acacia senegal	-2.23333	11.45	SeSam - Senckenbergische Sammlungsdatenbanken (Herbarium Senckenbergianum)	Brandis, D., Menner, L., Allspach, A. and Türkay, M. 2007. The collection Management System SeSam of the Senckenberg Research Institute. Zoology 110: 161-162.	collection data
Acacia senegal	-0.0333333	14.05	SeSam - Senckenbergische Sammlungsdatenbanken (Herbarium Senckenbergianum)	Brandis, D., Menner, L., Allspach, A. and Türkay, M. 2007. The collection Management System SeSam of the Senckenberg Research Institute. Zoology 110: 161-162.	collection data
Acacia senegal	-0.216667	14.0833	SeSam - Senckenbergische Sammlungsdatenbanken (Herbarium Senckenbergianum)	Brandis, D., Menner, L., Allspach, A. and Türkay, M. 2007. The collection Management System SeSam of the Senckenberg Research Institute. Zoology 110: 161-162.	collection data
Acacia senegal	-0.35	14.65	SeSam - Senckenbergische Sammlungsdatenbanken (Herbarium Senckenbergianum)	Brandis, D., Menner, L., Allspach, A. and Türkay, M. 2007. The collection Management System SeSam of the Senckenberg Research Institute. Zoology 110: 161-162.	collection data
Acacia senegal	-0.45	14.6833	SeSam - Senckenbergische Sammlungsdatenbanken (Herbarium Senckenbergianum)	Brandis, D., Menner, L., Allspach, A. and Türkay, M. 2007. The collection Management System SeSam of the Senckenberg Research Institute. Zoology 110: 161-162.	collection data
Acacia senegal	-0.0833333	14.7	SeSam - Senckenbergische Sammlungsdatenbanken (Herbarium Senckenbergianum)	Brandis, D., Menner, L., Allspach, A. and Türkay, M. 2007. The collection Management System SeSam of the Senckenberg Research Institute. Zoology 110: 161-162.	collection data
Acacia senegal	2.25318	10.4104	West African Vegetation Database - records of Herbarium Senckenbergianum	Schmidt M, Janßen T, Dressler S, Hahn K, Hien M, Konaté S, Lykke AM, Mahamane A, Sambou B, Sinsin B, Thiombiano A, Wittig R, Zizka G (2012) The West African Vegetation Database. Biodiversity and Ecology 4: 105-110.	observation data
Acacia senegal	2.24676	10.4176	West African Vegetation Database - records of Herbarium Senckenbergianum	Schmidt M, Janßen T, Dressler S, Hahn K, Hien M, Konaté S, Lykke AM, Mahamane A, Sambou B, Sinsin B, Thiombiano A, Wittig R, Zizka G (2012) The West African Vegetation Database. Biodiversity and Ecology 4: 105-110.	observation data
Acacia senegal	-0.135722	14.3466	West African Vegetation Database - records of Herbarium Senckenbergianum	Schmidt M, Janßen T, Dressler S, Hahn K, Hien M, Konaté S, Lykke AM, Mahamane A, Sambou B, Sinsin B, Thiombiano A, Wittig R, Zizka G (2012) The West African Vegetation Database. Biodiversity and Ecology 4: 105-110.	observation data
Acacia senegal	-0.283079	14.3883	West African Vegetation Database - records of Herbarium Senckenbergianum	Schmidt M, Janßen T, Dressler S, Hahn K, Hien M, Konaté S, Lykke AM, Mahamane A, Sambou B, Sinsin B, Thiombiano A, Wittig R, Zizka G (2012) The West African Vegetation Database. Biodiversity and Ecology 4: 105-110.	observation data
Acacia senegal	-0.0886944	14.5661	West African Vegetation Database - records of Herbarium Senckenbergianum	Schmidt M, Janßen T, Dressler S, Hahn K, Hien M, Konaté S, Lykke AM, Mahamane A, Sambou B, Sinsin B, Thiombiano A, Wittig R, Zizka G (2012) The West African Vegetation Database. Biodiversity and Ecology 4: 105-110.	observation data
Acacia senegal	-0.13025	14.5744	West African Vegetation Database - records of Herbarium Senckenbergianum	Schmidt M, Janßen T, Dressler S, Hahn K, Hien M, Konaté S, Lykke AM, Mahamane A, Sambou B, Sinsin B, Thiombiano A, Wittig R, Zizka G (2012) The West African Vegetation Database. Biodiversity and Ecology 4: 105-110.	observation data
Acacia senegal	-0.131389	14.5756	West African Vegetation Database - records of Herbarium Senckenbergianum	Schmidt M, Janßen T, Dressler S, Hahn K, Hien M, Konaté S, Lykke AM, Mahamane A, Sambou B, Sinsin B, Thiombiano A, Wittig R, Zizka G (2012) The West African Vegetation Database. Biodiversity and Ecology 4: 105-110.	observation data
Acacia senegal	-0.117333	14.5759	West African Vegetation Database - records of Herbarium Senckenbergianum	Schmidt M, Janßen T, Dressler S, Hahn K, Hien M, Konaté S, Lykke AM, Mahamane A, Sambou B, Sinsin B, Thiombiano A, Wittig R, Zizka G (2012) The West African Vegetation Database. Biodiversity and Ecology 4: 105-110.	observation data
Acacia senegal	-0.462083	14.5816	West African Vegetation Database - records of Herbarium Senckenbergianum	Schmidt M, Janßen T, Dressler S, Hahn K, Hien M, Konaté S, Lykke AM, Mahamane A, Sambou B, Sinsin B, Thiombiano A, Wittig R, Zizka G (2012) The West African Vegetation Database. Biodiversity and Ecology 4: 105-110.	observation data
Acacia senegal	0.0756667	14.6415	West African Vegetation Database - records of Herbarium Senckenbergianum	Schmidt M, Janßen T, Dressler S, Hahn K, Hien M, Konaté S, Lykke AM, Mahamane A, Sambou B, Sinsin B, Thiombiano A, Wittig R, Zizka G (2012) The West African Vegetation Database. Biodiversity and Ecology 4: 105-110.	observation data
Acacia senegal	-0.564167	14.6753	West African Vegetation Database - records of Herbarium Senckenbergianum	Schmidt M, Janßen T, Dressler S, Hahn K, Hien M, Konaté S, Lykke AM, Mahamane A, Sambou B, Sinsin B, Thiombiano A, Wittig R, Zizka G (2012) The West African Vegetation Database. Biodiversity and Ecology 4: 105-110.	observation data
Acacia senegal	-0.5565	14.7893	West African Vegetation Database - records of Herbarium Senckenbergianum	Schmidt M, Janßen T, Dressler S, Hahn K, Hien M, Konaté S, Lykke AM, Mahamane A, Sambou B, Sinsin B, Thiombiano A, Wittig R, Zizka G (2012) The West African Vegetation Database. Biodiversity and Ecology 4: 105-110.	observation data
Acacia senegal	-0.479722	14.8071	West African Vegetation Database - records of Herbarium Senckenbergianum	Schmidt M, Janßen T, Dressler S, Hahn K, Hien M, Konaté S, Lykke AM, Mahamane A, Sambou B, Sinsin B, Thiombiano A, Wittig R, Zizka G (2012) The West African Vegetation Database. Biodiversity and Ecology 4: 105-110.	observation data
Acacia senegal	-0.531333	14.818	West African Vegetation Database - records of Herbarium Senckenbergianum	Schmidt M, Janßen T, Dressler S, Hahn K, Hien M, Konaté S, Lykke AM, Mahamane A, Sambou B, Sinsin B, Thiombiano A, Wittig R, Zizka G (2012) The West African Vegetation Database. Biodiversity and Ecology 4: 105-110.	observation data
Acacia senegal	-0.625972	14.8786	West African Vegetation Database - records of Herbarium Senckenbergianum	Schmidt M, Janßen T, Dressler S, Hahn K, Hien M, Konaté S, Lykke AM, Mahamane A, Sambou B, Sinsin B, Thiombiano A, Wittig R, Zizka G (2012) The West African Vegetation Database. Biodiversity and Ecology 4: 105-110.	observation data
Acacia senegal	-1.57326	13.75	West African Plants Database	Brunken U, Schmidt M, Dressler S, Janssen T, Thiombiano A, Zizka G (2008) www.westafricanplants.senckenberg.de - An image-based identification tool for West African Plants. Taxon 57 (3): 1027-1028.	georeferenced photo records
Acacia senegal	-1.57327	13.75	West African Plants Database	Brunken U, Schmidt M, Dressler S, Janssen T, Thiombiano A, Zizka G (2008) www.westafricanplants.senckenberg.de - An image-based identification tool for West African Plants. Taxon 57 (3): 1027-1028.	georeferenced photo records
Acacia senegal	-1.57327	13.75	West African Plants Database	Brunken U, Schmidt M, Dressler S, Janssen T, Thiombiano A, Zizka G (2008) www.westafricanplants.senckenberg.de - An image-based identification tool for West African Plants. Taxon 57 (3): 1027-1028.	georeferenced photo records
Acacia senegal	-4.0233	14.892	West African Plants Database	Brunken U, Schmidt M, Dressler S, Janssen T, Thiombiano A, Zizka G (2008) www.westafricanplants.senckenberg.de - An image-based identification tool for West African Plants. Taxon 57 (3): 1027-1028.	georeferenced photo records
Acacia senegal	-3.52083	11.4792	Terrible tree species distribution map - georeferenced in Google Earth by Tor-Gunnar Vagen (ICRAF)	Terrible PB. Atlas de la Haute-Volta. Arbres et arbustes. Carte de répartition et de présence de 65 espèces. 1975	Georeferenced point locations created by Roeland Kindt (ICRAF) in centre of 2.5 minutes AFRICLIM grid cells
Acacia senegal	-3.27083	11.7292	Terrible tree species distribution map - georeferenced in Google Earth by Tor-Gunnar Vagen (ICRAF)	Terrible PB. Atlas de la Haute-Volta. Arbres et arbustes. Carte de répartition et de présence de 65 espèces. 1975	Georeferenced point locations created by Roeland Kindt (ICRAF) in centre of 2.5 minutes AFRICLIM grid cells
Acacia senegal	-3.4375	11.8125	Terrible tree species distribution map - georeferenced in Google Earth by Tor-Gunnar Vagen (ICRAF)	Terrible PB. Atlas de la Haute-Volta. Arbres et arbustes. Carte de répartition et de présence de 65 espèces. 1975	Georeferenced point locations created by Roeland Kindt (ICRAF) in centre of 2.5 minutes AFRICLIM grid cells
Acacia senegal	-3.6875	11.8958	Terrible tree species distribution map - georeferenced in Google Earth by Tor-Gunnar Vagen (ICRAF)	Terrible PB. Atlas de la Haute-Volta. Arbres et arbustes. Carte de répartition et de présence de 65 espèces. 1975	Georeferenced point locations created by Roeland Kindt (ICRAF) in centre of 2.5 minutes AFRICLIM grid cells
Acacia senegal	-0.395833	14.9792	Terrible tree species distribution map - georeferenced in Google Earth by Tor-Gunnar Vagen (ICRAF)	Terrible PB. Atlas de la Haute-Volta. Arbres et arbustes. Carte de répartition et de présence de 65 espèces. 1975	Georeferenced point locations created by Roeland Kindt (ICRAF) in centre of 2.5 minutes AFRICLIM grid cells
Acacia senegal	0.0208333	14.8958	Terrible tree species distribution map - georeferenced in Google Earth by Tor-Gunnar Vagen (ICRAF)	Terrible PB. Atlas de la Haute-Volta. Arbres et arbustes. Carte de répartition et de présence de 65 espèces. 1975	Georeferenced point locations created by Roeland Kindt (ICRAF) in centre of 2.5 minutes AFRICLIM grid cells
Acacia senegal	0.0208333	14.7708	Terrible tree species distribution map - georeferenced in Google Earth by Tor-Gunnar Vagen (ICRAF)	Terrible PB. Atlas de la Haute-Volta. Arbres et arbustes. Carte de répartition et de présence de 65 espèces. 1975	Georeferenced point locations created by Roeland Kindt (ICRAF) in centre of 2.5 minutes AFRICLIM grid cells
Acacia senegal	-0.0625	14.6875	Terrible tree species distribution map - georeferenced in Google Earth by Tor-Gunnar Vagen (ICRAF)	Terrible PB. Atlas de la Haute-Volta. Arbres et arbustes. Carte de répartition et de présence de 65 espèces. 1975	Georeferenced point locations created by Roeland Kindt (ICRAF) in centre of 2.5 minutes AFRICLIM grid cells
Acacia senegal	-0.604167	14.5208	Terrible tree species distribution map - georeferenced in Google Earth by Tor-Gunnar Vagen (ICRAF)	Terrible PB. Atlas de la Haute-Volta. Arbres et arbustes. Carte de répartition et de présence de 65 espèces. 1975	Georeferenced point locations created by Roeland Kindt (ICRAF) in centre of 2.5 minutes AFRICLIM grid cells
Acacia senegal	-0.0625	14.1458	Terrible tree species distribution map - georeferenced in Google Earth by Tor-Gunnar Vagen (ICRAF)	Terrible PB. Atlas de la Haute-Volta. Arbres et arbustes. Carte de répartition et de présence de 65 espèces. 1975	Georeferenced point locations created by Roeland Kindt (ICRAF) in centre of 2.5 minutes AFRICLIM grid cells
Acacia senegal	-0.0625	14.0625	Terrible tree species distribution map - georeferenced in Google Earth by Tor-Gunnar Vagen (ICRAF)	Terrible PB. Atlas de la Haute-Volta. Arbres et arbustes. Carte de répartition et de présence de 65 espèces. 1975	Georeferenced point locations created by Roeland Kindt (ICRAF) in centre of 2.5 minutes AFRICLIM grid cells
Acacia senegal	-0.0625	14.0208	Terrible tree species distribution map - georeferenced in Google Earth by Tor-Gunnar Vagen (ICRAF)	Terrible PB. Atlas de la Haute-Volta. Arbres et arbustes. Carte de répartition et de présence de 65 espèces. 1975	Georeferenced point locations created by Roeland Kindt (ICRAF) in centre of 2.5 minutes AFRICLIM grid cells
Acacia senegal	-0.0208333	13.9792	Terrible tree species distribution map - georeferenced in Google Earth by Tor-Gunnar Vagen (ICRAF)	Terrible PB. Atlas de la Haute-Volta. Arbres et arbustes. Carte de répartition et de présence de 65 espèces. 1975	Georeferenced point locations created by Roeland Kindt (ICRAF) in centre of 2.5 minutes AFRICLIM grid cells
Acacia senegal	-0.0625	13.8958	Terrible tree species distribution map - georeferenced in Google Earth by Tor-Gunnar Vagen (ICRAF)	Terrible PB. Atlas de la Haute-Volta. Arbres et arbustes. Carte de répartition et de présence de 65 espèces. 1975	Georeferenced point locations created by Roeland Kindt (ICRAF) in centre of 2.5 minutes AFRICLIM grid cells
Acacia senegal	0.104167	13.8958	Terrible tree species distribution map - georeferenced in Google Earth by Tor-Gunnar Vagen (ICRAF)	Terrible PB. Atlas de la Haute-Volta. Arbres et arbustes. Carte de répartition et de présence de 65 espèces. 1975	Georeferenced point locations created by Roeland Kindt (ICRAF) in centre of 2.5 minutes AFRICLIM grid cells
Acacia senegal	0.104167	13.8542	Terrible tree species distribution map - georeferenced in Google Earth by Tor-Gunnar Vagen (ICRAF)	Terrible PB. Atlas de la Haute-Volta. Arbres et arbustes. Carte de répartition et de présence de 65 espèces. 1975	Georeferenced point locations created by Roeland Kindt (ICRAF) in centre of 2.5 minutes AFRICLIM grid cells
Acacia senegal	0.1875	13.8125	Terrible tree species distribution map - georeferenced in Google Earth by Tor-Gunnar Vagen (ICRAF)	Terrible PB. Atlas de la Haute-Volta. Arbres et arbustes. Carte de répartition et de présence de 65 espèces. 1975	Georeferenced point locations created by Roeland Kindt (ICRAF) in centre of 2.5 minutes AFRICLIM grid cells
Acacia senegal	0.104167	14.2708	Terrible tree species distribution map - georeferenced in Google Earth by Tor-Gunnar Vagen (ICRAF)	Terrible PB. Atlas de la Haute-Volta. Arbres et arbustes. Carte de répartition et de présence de 65 espèces. 1975	Georeferenced point locations created by Roeland Kindt (ICRAF) in centre of 2.5 minutes AFRICLIM grid cells
Acacia senegal	0.0625	14.1875	Terrible tree species distribution map - georeferenced in Google Earth by Tor-Gunnar Vagen (ICRAF)	Terrible PB. Atlas de la Haute-Volta. Arbres et arbustes. Carte de répartition et de présence de 65 espèces. 1975	Georeferenced point locations created by Roeland Kindt (ICRAF) in centre of 2.5 minutes AFRICLIM grid cells
Acacia senegal	0.479167	13.4792	Terrible tree species distribution map - georeferenced in Google Earth by Tor-Gunnar Vagen (ICRAF)	Terrible PB. Atlas de la Haute-Volta. Arbres et arbustes. Carte de répartition et de présence de 65 espèces. 1975	Georeferenced point locations created by Roeland Kindt (ICRAF) in centre of 2.5 minutes AFRICLIM grid cells
Acacia senegal	-0.145833	13.3958	Terrible tree species distribution map - georeferenced in Google Earth by Tor-Gunnar Vagen (ICRAF)	Terrible PB. Atlas de la Haute-Volta. Arbres et arbustes. Carte de répartition et de présence de 65 espèces. 1975	Georeferenced point locations created by Roeland Kindt (ICRAF) in centre of 2.5 minutes AFRICLIM grid cells
Acacia senegal	-0.1875	13.3125	Terrible tree species distribution map - georeferenced in Google Earth by Tor-Gunnar Vagen (ICRAF)	Terrible PB. Atlas de la Haute-Volta. Arbres et arbustes. Carte de répartition et de présence de 65 espèces. 1975	Georeferenced point locations created by Roeland Kindt (ICRAF) in centre of 2.5 minutes AFRICLIM grid cells
Acacia senegal	-0.145833	13.1875	Terrible tree species distribution map - georeferenced in Google Earth by Tor-Gunnar Vagen (ICRAF)	Terrible PB. Atlas de la Haute-Volta. Arbres et arbustes. Carte de répartition et de présence de 65 espèces. 1975	Georeferenced point locations created by Roeland Kindt (ICRAF) in centre of 2.5 minutes AFRICLIM grid cells
Acacia senegal	-0.1875	13.0625	Terrible tree species distribution map - georeferenced in Google Earth by Tor-Gunnar Vagen (ICRAF)	Terrible PB. Atlas de la Haute-Volta. Arbres et arbustes. Carte de répartition et de présence de 65 espèces. 1975	Georeferenced point locations created by Roeland Kindt (ICRAF) in centre of 2.5 minutes AFRICLIM grid cells
Acacia senegal	-0.145833	12.7708	Terrible tree species distribution map - georeferenced in Google Earth by Tor-Gunnar Vagen (ICRAF)	Terrible PB. Atlas de la Haute-Volta. Arbres et arbustes. Carte de répartition et de présence de 65 espèces. 1975	Georeferenced point locations created by Roeland Kindt (ICRAF) in centre of 2.5 minutes AFRICLIM grid cells
Acacia senegal	-0.270833	12.7292	Terrible tree species distribution map - georeferenced in Google Earth by Tor-Gunnar Vagen (ICRAF)	Terrible PB. Atlas de la Haute-Volta. Arbres et arbustes. Carte de répartition et de présence de 65 espèces. 1975	Georeferenced point locations created by Roeland Kindt (ICRAF) in centre of 2.5 minutes AFRICLIM grid cells
Acacia senegal	0.4375	12.6875	Terrible tree species distribution map - georeferenced in Google Earth by Tor-Gunnar Vagen (ICRAF)	Terrible PB. Atlas de la Haute-Volta. Arbres et arbustes. Carte de répartition et de présence de 65 espèces. 1975	Georeferenced point locations created by Roeland Kindt (ICRAF) in centre of 2.5 minutes AFRICLIM grid cells
Acacia senegal	0.4375	12.6042	Terrible tree species distribution map - georeferenced in Google Earth by Tor-Gunnar Vagen (ICRAF)	Terrible PB. Atlas de la Haute-Volta. Arbres et arbustes. Carte de répartition et de présence de 65 espèces. 1975	Georeferenced point locations created by Roeland Kindt (ICRAF) in centre of 2.5 minutes AFRICLIM grid cells
Acacia senegal	0.395833	12.4792	Terrible tree species distribution map - georeferenced in Google Earth by Tor-Gunnar Vagen (ICRAF)	Terrible PB. Atlas de la Haute-Volta. Arbres et arbustes. Carte de répartition et de présence de 65 espèces. 1975	Georeferenced point locations created by Roeland Kindt (ICRAF) in centre of 2.5 minutes AFRICLIM grid cells
Acacia senegal	0.895833	12.4375	Terrible tree species distribution map - georeferenced in Google Earth by Tor-Gunnar Vagen (ICRAF)	Terrible PB. Atlas de la Haute-Volta. Arbres et arbustes. Carte de répartition et de présence de 65 espèces. 1975	Georeferenced point locations created by Roeland Kindt (ICRAF) in centre of 2.5 minutes AFRICLIM grid cells
Acacia senegal	1.5625	12.4792	Terrible tree species distribution map - georeferenced in Google Earth by Tor-Gunnar Vagen (ICRAF)	Terrible PB. Atlas de la Haute-Volta. Arbres et arbustes. Carte de répartition et de présence de 65 espèces. 1975	Georeferenced point locations created by Roeland Kindt (ICRAF) in centre of 2.5 minutes AFRICLIM grid cells
Acacia senegal	2.02083	12.6458	Terrible tree species distribution map - georeferenced in Google Earth by Tor-Gunnar Vagen (ICRAF)	Terrible PB. Atlas de la Haute-Volta. Arbres et arbustes. Carte de répartition et de présence de 65 espèces. 1975	Georeferenced point locations created by Roeland Kindt (ICRAF) in centre of 2.5 minutes AFRICLIM grid cells
Acacia senegal	1.85417	12.6042	Terrible tree species distribution map - georeferenced in Google Earth by Tor-Gunnar Vagen (ICRAF)	Terrible PB. Atlas de la Haute-Volta. Arbres et arbustes. Carte de répartition et de présence de 65 espèces. 1975	Georeferenced point locations created by Roeland Kindt (ICRAF) in centre of 2.5 minutes AFRICLIM grid cells
Acacia senegal	1.64583	12.5208	Terrible tree species distribution map - georeferenced in Google Earth by Tor-Gunnar Vagen (ICRAF)	Terrible PB. Atlas de la Haute-Volta. Arbres et arbustes. Carte de répartition et de présence de 65 espèces. 1975	Georeferenced point locations created by Roeland Kindt (ICRAF) in centre of 2.5 minutes AFRICLIM grid cells
Acacia senegal	1.97917	12.2708	Terrible tree species distribution map - georeferenced in Google Earth by Tor-Gunnar Vagen (ICRAF)	Terrible PB. Atlas de la Haute-Volta. Arbres et arbustes. Carte de répartition et de présence de 65 espèces. 1975	Georeferenced point locations created by Roeland Kindt (ICRAF) in centre of 2.5 minutes AFRICLIM grid cells
Acacia senegal	-0.770833	14.3958	Terrible tree species distribution map - georeferenced in Google Earth by Tor-Gunnar Vagen (ICRAF)	Terrible PB. Atlas de la Haute-Volta. Arbres et arbustes. Carte de répartition et de présence de 65 espèces. 1975	Georeferenced point locations created by Roeland Kindt (ICRAF) in centre of 2.5 minutes AFRICLIM grid cells
Acacia senegal	-0.854167	14.2708	Terrible tree species distribution map - georeferenced in Google Earth by Tor-Gunnar Vagen (ICRAF)	Terrible PB. Atlas de la Haute-Volta. Arbres et arbustes. Carte de répartition et de présence de 65 espèces. 1975	Georeferenced point locations created by Roeland Kindt (ICRAF) in centre of 2.5 minutes AFRICLIM grid cells
Acacia senegal	-0.479167	13.3958	Terrible tree species distribution map - georeferenced in Google Earth by Tor-Gunnar Vagen (ICRAF)	Terrible PB. Atlas de la Haute-Volta. Arbres et arbustes. Carte de répartition et de présence de 65 espèces. 1975	Georeferenced point locations created by Roeland Kindt (ICRAF) in centre of 2.5 minutes AFRICLIM grid cells
Acacia senegal	-0.770833	12.8958	Terrible tree species distribution map - georeferenced in Google Earth by Tor-Gunnar Vagen (ICRAF)	Terrible PB. Atlas de la Haute-Volta. Arbres et arbustes. Carte de répartition et de présence de 65 espèces. 1975	Georeferenced point locations created by Roeland Kindt (ICRAF) in centre of 2.5 minutes AFRICLIM grid cells
Acacia senegal	1.77083	11.8125	Terrible tree species distribution map - georeferenced in Google Earth by Tor-Gunnar Vagen (ICRAF)	Terrible PB. Atlas de la Haute-Volta. Arbres et arbustes. Carte de répartition et de présence de 65 espèces. 1975	Georeferenced point locations created by Roeland Kindt (ICRAF) in centre of 2.5 minutes AFRICLIM grid cells
Acacia senegal	1.64583	11.4375	Terrible tree species distribution map - georeferenced in Google Earth by Tor-Gunnar Vagen (ICRAF)	Terrible PB. Atlas de la Haute-Volta. Arbres et arbustes. Carte de répartition et de présence de 65 espèces. 1975	Georeferenced point locations created by Roeland Kindt (ICRAF) in centre of 2.5 minutes AFRICLIM grid cells
Acacia senegal	1.10417	11.3958	Terrible tree species distribution map - georeferenced in Google Earth by Tor-Gunnar Vagen (ICRAF)	Terrible PB. Atlas de la Haute-Volta. Arbres et arbustes. Carte de répartition et de présence de 65 espèces. 1975	Georeferenced point locations created by Roeland Kindt (ICRAF) in centre of 2.5 minutes AFRICLIM grid cells
Acacia senegal	1.0625	11.3542	Terrible tree species distribution map - georeferenced in Google Earth by Tor-Gunnar Vagen (ICRAF)	Terrible PB. Atlas de la Haute-Volta. Arbres et arbustes. Carte de répartition et de présence de 65 espèces. 1975	Georeferenced point locations created by Roeland Kindt (ICRAF) in centre of 2.5 minutes AFRICLIM grid cells
Acacia senegal	-0.145833	11.1458	Terrible tree species distribution map - georeferenced in Google Earth by Tor-Gunnar Vagen (ICRAF)	Terrible PB. Atlas de la Haute-Volta. Arbres et arbustes. Carte de répartition et de présence de 65 espèces. 1975	Georeferenced point locations created by Roeland Kindt (ICRAF) in centre of 2.5 minutes AFRICLIM grid cells
Acacia senegal	0.0625	11.1875	Terrible tree species distribution map - georeferenced in Google Earth by Tor-Gunnar Vagen (ICRAF)	Terrible PB. Atlas de la Haute-Volta. Arbres et arbustes. Carte de répartition et de présence de 65 espèces. 1975	Georeferenced point locations created by Roeland Kindt (ICRAF) in centre of 2.5 minutes AFRICLIM grid cells
Acacia senegal	0.104167	11.2708	Terrible tree species distribution map - georeferenced in Google Earth by Tor-Gunnar Vagen (ICRAF)	Terrible PB. Atlas de la Haute-Volta. Arbres et arbustes. Carte de répartition et de présence de 65 espèces. 1975	Georeferenced point locations created by Roeland Kindt (ICRAF) in centre of 2.5 minutes AFRICLIM grid cells
Acacia senegal	0.604167	11.3125	Terrible tree species distribution map - georeferenced in Google Earth by Tor-Gunnar Vagen (ICRAF)	Terrible PB. Atlas de la Haute-Volta. Arbres et arbustes. Carte de répartition et de présence de 65 espèces. 1975	Georeferenced point locations created by Roeland Kindt (ICRAF) in centre of 2.5 minutes AFRICLIM grid cells
Acacia senegal	0.520833	11.4792	Terrible tree species distribution map - georeferenced in Google Earth by Tor-Gunnar Vagen (ICRAF)	Terrible PB. Atlas de la Haute-Volta. Arbres et arbustes. Carte de répartition et de présence de 65 espèces. 1975	Georeferenced point locations created by Roeland Kindt (ICRAF) in centre of 2.5 minutes AFRICLIM grid cells
Acacia senegal	0.520833	11.5625	Terrible tree species distribution map - georeferenced in Google Earth by Tor-Gunnar Vagen (ICRAF)	Terrible PB. Atlas de la Haute-Volta. Arbres et arbustes. Carte de répartition et de présence de 65 espèces. 1975	Georeferenced point locations created by Roeland Kindt (ICRAF) in centre of 2.5 minutes AFRICLIM grid cells
Acacia senegal	0.479167	11.7292	Terrible tree species distribution map - georeferenced in Google Earth by Tor-Gunnar Vagen (ICRAF)	Terrible PB. Atlas de la Haute-Volta. Arbres et arbustes. Carte de répartition et de présence de 65 espèces. 1975	Georeferenced point locations created by Roeland Kindt (ICRAF) in centre of 2.5 minutes AFRICLIM grid cells
Acacia senegal	0.4375	11.7708	Terrible tree species distribution map - georeferenced in Google Earth by Tor-Gunnar Vagen (ICRAF)	Terrible PB. Atlas de la Haute-Volta. Arbres et arbustes. Carte de répartition et de présence de 65 espèces. 1975	Georeferenced point locations created by Roeland Kindt (ICRAF) in centre of 2.5 minutes AFRICLIM grid cells
Acacia senegal	0.395833	11.9375	Terrible tree species distribution map - georeferenced in Google Earth by Tor-Gunnar Vagen (ICRAF)	Terrible PB. Atlas de la Haute-Volta. Arbres et arbustes. Carte de répartition et de présence de 65 espèces. 1975	Georeferenced point locations created by Roeland Kindt (ICRAF) in centre of 2.5 minutes AFRICLIM grid cells
Acacia senegal	0.5625	12.0208	Terrible tree species distribution map - georeferenced in Google Earth by Tor-Gunnar Vagen (ICRAF)	Terrible PB. Atlas de la Haute-Volta. Arbres et arbustes. Carte de répartition et de présence de 65 espèces. 1975	Georeferenced point locations created by Roeland Kindt (ICRAF) in centre of 2.5 minutes AFRICLIM grid cells
Acacia senegal	0.645833	12.0625	Terrible tree species distribution map - georeferenced in Google Earth by Tor-Gunnar Vagen (ICRAF)	Terrible PB. Atlas de la Haute-Volta. Arbres et arbustes. Carte de répartition et de présence de 65 espèces. 1975	Georeferenced point locations created by Roeland Kindt (ICRAF) in centre of 2.5 minutes AFRICLIM grid cells
Acacia senegal	-0.645833	11.7708	Terrible tree species distribution map - georeferenced in Google Earth by Tor-Gunnar Vagen (ICRAF)	Terrible PB. Atlas de la Haute-Volta. Arbres et arbustes. Carte de répartition et de présence de 65 espèces. 1975	Georeferenced point locations created by Roeland Kindt (ICRAF) in centre of 2.5 minutes AFRICLIM grid cells
Acacia senegal	-0.354167	11.3542	Terrible tree species distribution map - georeferenced in Google Earth by Tor-Gunnar Vagen (ICRAF)	Terrible PB. Atlas de la Haute-Volta. Arbres et arbustes. Carte de répartition et de présence de 65 espèces. 1975	Georeferenced point locations created by Roeland Kindt (ICRAF) in centre of 2.5 minutes AFRICLIM grid cells
Acacia senegal	-0.3125	11.2292	Terrible tree species distribution map - georeferenced in Google Earth by Tor-Gunnar Vagen (ICRAF)	Terrible PB. Atlas de la Haute-Volta. Arbres et arbustes. Carte de répartition et de présence de 65 espèces. 1975	Georeferenced point locations created by Roeland Kindt (ICRAF) in centre of 2.5 minutes AFRICLIM grid cells
Acacia senegal	-0.729167	11.1042	Terrible tree species distribution map - georeferenced in Google Earth by Tor-Gunnar Vagen (ICRAF)	Terrible PB. Atlas de la Haute-Volta. Arbres et arbustes. Carte de répartition et de présence de 65 espèces. 1975	Georeferenced point locations created by Roeland Kindt (ICRAF) in centre of 2.5 minutes AFRICLIM grid cells
Acacia senegal	-1.10417	11.1875	Terrible tree species distribution map - georeferenced in Google Earth by Tor-Gunnar Vagen (ICRAF)	Terrible PB. Atlas de la Haute-Volta. Arbres et arbustes. Carte de répartition et de présence de 65 espèces. 1975	Georeferenced point locations created by Roeland Kindt (ICRAF) in centre of 2.5 minutes AFRICLIM grid cells
Acacia senegal	-1.02083	11.1875	Terrible tree species distribution map - georeferenced in Google Earth by Tor-Gunnar Vagen (ICRAF)	Terrible PB. Atlas de la Haute-Volta. Arbres et arbustes. Carte de répartition et de présence de 65 espèces. 1975	Georeferenced point locations created by Roeland Kindt (ICRAF) in centre of 2.5 minutes AFRICLIM grid cells
Acacia senegal	-1.14583	11.2708	Terrible tree species distribution map - georeferenced in Google Earth by Tor-Gunnar Vagen (ICRAF)	Terrible PB. Atlas de la Haute-Volta. Arbres et arbustes. Carte de répartition et de présence de 65 espèces. 1975	Georeferenced point locations created by Roeland Kindt (ICRAF) in centre of 2.5 minutes AFRICLIM grid cells
Acacia senegal	-1.1875	11.5208	Terrible tree species distribution map - georeferenced in Google Earth by Tor-Gunnar Vagen (ICRAF)	Terrible PB. Atlas de la Haute-Volta. Arbres et arbustes. Carte de répartition et de présence de 65 espèces. 1975	Georeferenced point locations created by Roeland Kindt (ICRAF) in centre of 2.5 minutes AFRICLIM grid cells
Acacia senegal	-0.979167	11.1875	Terrible tree species distribution map - georeferenced in Google Earth by Tor-Gunnar Vagen (ICRAF)	Terrible PB. Atlas de la Haute-Volta. Arbres et arbustes. Carte de répartition et de présence de 65 espèces. 1975	Georeferenced point locations created by Roeland Kindt (ICRAF) in centre of 2.5 minutes AFRICLIM grid cells
Acacia senegal	-0.979167	11.1458	Terrible tree species distribution map - georeferenced in Google Earth by Tor-Gunnar Vagen (ICRAF)	Terrible PB. Atlas de la Haute-Volta. Arbres et arbustes. Carte de répartition et de présence de 65 espèces. 1975	Georeferenced point locations created by Roeland Kindt (ICRAF) in centre of 2.5 minutes AFRICLIM grid cells
Acacia senegal	-1.9375	14.1875	Terrible tree species distribution map - georeferenced in Google Earth by Tor-Gunnar Vagen (ICRAF)	Terrible PB. Atlas de la Haute-Volta. Arbres et arbustes. Carte de répartition et de présence de 65 espèces. 1975	Georeferenced point locations created by Roeland Kindt (ICRAF) in centre of 2.5 minutes AFRICLIM grid cells
Acacia senegal	-1.64583	14.0625	Terrible tree species distribution map - georeferenced in Google Earth by Tor-Gunnar Vagen (ICRAF)	Terrible PB. Atlas de la Haute-Volta. Arbres et arbustes. Carte de répartition et de présence de 65 espèces. 1975	Georeferenced point locations created by Roeland Kindt (ICRAF) in centre of 2.5 minutes AFRICLIM grid cells
Acacia senegal	-1.6875	14.0208	Terrible tree species distribution map - georeferenced in Google Earth by Tor-Gunnar Vagen (ICRAF)	Terrible PB. Atlas de la Haute-Volta. Arbres et arbustes. Carte de répartition et de présence de 65 espèces. 1975	Georeferenced point locations created by Roeland Kindt (ICRAF) in centre of 2.5 minutes AFRICLIM grid cells
Acacia senegal	-1.72917	13.9375	Terrible tree species distribution map - georeferenced in Google Earth by Tor-Gunnar Vagen (ICRAF)	Terrible PB. Atlas de la Haute-Volta. Arbres et arbustes. Carte de répartition et de présence de 65 espèces. 1975	Georeferenced point locations created by Roeland Kindt (ICRAF) in centre of 2.5 minutes AFRICLIM grid cells
Acacia senegal	-1.60417	13.8542	Terrible tree species distribution map - georeferenced in Google Earth by Tor-Gunnar Vagen (ICRAF)	Terrible PB. Atlas de la Haute-Volta. Arbres et arbustes. Carte de répartition et de présence de 65 espèces. 1975	Georeferenced point locations created by Roeland Kindt (ICRAF) in centre of 2.5 minutes AFRICLIM grid cells
Acacia senegal	-0.979167	13.4375	Terrible tree species distribution map - georeferenced in Google Earth by Tor-Gunnar Vagen (ICRAF)	Terrible PB. Atlas de la Haute-Volta. Arbres et arbustes. Carte de répartition et de présence de 65 espèces. 1975	Georeferenced point locations created by Roeland Kindt (ICRAF) in centre of 2.5 minutes AFRICLIM grid cells
Acacia senegal	-1.0625	13.2292	Terrible tree species distribution map - georeferenced in Google Earth by Tor-Gunnar Vagen (ICRAF)	Terrible PB. Atlas de la Haute-Volta. Arbres et arbustes. Carte de répartition et de présence de 65 espèces. 1975	Georeferenced point locations created by Roeland Kindt (ICRAF) in centre of 2.5 minutes AFRICLIM grid cells
Acacia senegal	-1.02083	13.1458	Terrible tree species distribution map - georeferenced in Google Earth by Tor-Gunnar Vagen (ICRAF)	Terrible PB. Atlas de la Haute-Volta. Arbres et arbustes. Carte de répartition et de présence de 65 espèces. 1975	Georeferenced point locations created by Roeland Kindt (ICRAF) in centre of 2.5 minutes AFRICLIM grid cells
Acacia senegal	-0.895833	12.9375	Terrible tree species distribution map - georeferenced in Google Earth by Tor-Gunnar Vagen (ICRAF)	Terrible PB. Atlas de la Haute-Volta. Arbres et arbustes. Carte de répartition et de présence de 65 espèces. 1975	Georeferenced point locations created by Roeland Kindt (ICRAF) in centre of 2.5 minutes AFRICLIM grid cells
Acacia senegal	-0.604167	12.7292	Terrible tree species distribution map - georeferenced in Google Earth by Tor-Gunnar Vagen (ICRAF)	Terrible PB. Atlas de la Haute-Volta. Arbres et arbustes. Carte de répartition et de présence de 65 espèces. 1975	Georeferenced point locations created by Roeland Kindt (ICRAF) in centre of 2.5 minutes AFRICLIM grid cells
Acacia senegal	1.3125	12.4375	Terrible tree species distribution map - georeferenced in Google Earth by Tor-Gunnar Vagen (ICRAF)	Terrible PB. Atlas de la Haute-Volta. Arbres et arbustes. Carte de répartition et de présence de 65 espèces. 1975	Georeferenced point locations created by Roeland Kindt (ICRAF) in centre of 2.5 minutes AFRICLIM grid cells
Acacia senegal	1.3125	12.3958	Terrible tree species distribution map - georeferenced in Google Earth by Tor-Gunnar Vagen (ICRAF)	Terrible PB. Atlas de la Haute-Volta. Arbres et arbustes. Carte de répartition et de présence de 65 espèces. 1975	Georeferenced point locations created by Roeland Kindt (ICRAF) in centre of 2.5 minutes AFRICLIM grid cells
Acacia senegal	1.1875	12.3958	Terrible tree species distribution map - georeferenced in Google Earth by Tor-Gunnar Vagen (ICRAF)	Terrible PB. Atlas de la Haute-Volta. Arbres et arbustes. Carte de répartition et de présence de 65 espèces. 1975	Georeferenced point locations created by Roeland Kindt (ICRAF) in centre of 2.5 minutes AFRICLIM grid cells
Acacia senegal	0.9375	12.1875	Terrible tree species distribution map - georeferenced in Google Earth by Tor-Gunnar Vagen (ICRAF)	Terrible PB. Atlas de la Haute-Volta. Arbres et arbustes. Carte de répartition et de présence de 65 espèces. 1975	Georeferenced point locations created by Roeland Kindt (ICRAF) in centre of 2.5 minutes AFRICLIM grid cells
Acacia senegal	1.72917	12.0625	Terrible tree species distribution map - georeferenced in Google Earth by Tor-Gunnar Vagen (ICRAF)	Terrible PB. Atlas de la Haute-Volta. Arbres et arbustes. Carte de répartition et de présence de 65 espèces. 1975	Georeferenced point locations created by Roeland Kindt (ICRAF) in centre of 2.5 minutes AFRICLIM grid cells
Acacia senegal	1.72917	11.9375	Terrible tree species distribution map - georeferenced in Google Earth by Tor-Gunnar Vagen (ICRAF)	Terrible PB. Atlas de la Haute-Volta. Arbres et arbustes. Carte de répartition et de présence de 65 espèces. 1975	Georeferenced point locations created by Roeland Kindt (ICRAF) in centre of 2.5 minutes AFRICLIM grid cells
Acacia senegal	0.854167	12.1042	Terrible tree species distribution map - georeferenced in Google Earth by Tor-Gunnar Vagen (ICRAF)	Terrible PB. Atlas de la Haute-Volta. Arbres et arbustes. Carte de répartition et de présence de 65 espèces. 1975	Georeferenced point locations created by Roeland Kindt (ICRAF) in centre of 2.5 minutes AFRICLIM grid cells
Acacia senegal	0.520833	12.0208	Terrible tree species distribution map - georeferenced in Google Earth by Tor-Gunnar Vagen (ICRAF)	Terrible PB. Atlas de la Haute-Volta. Arbres et arbustes. Carte de répartition et de présence de 65 espèces. 1975	Georeferenced point locations created by Roeland Kindt (ICRAF) in centre of 2.5 minutes AFRICLIM grid cells
Acacia senegal	0.479167	12.0625	Terrible tree species distribution map - georeferenced in Google Earth by Tor-Gunnar Vagen (ICRAF)	Terrible PB. Atlas de la Haute-Volta. Arbres et arbustes. Carte de répartition et de présence de 65 espèces. 1975	Georeferenced point locations created by Roeland Kindt (ICRAF) in centre of 2.5 minutes AFRICLIM grid cells
Acacia senegal	0.3125	12.1875	Terrible tree species distribution map - georeferenced in Google Earth by Tor-Gunnar Vagen (ICRAF)	Terrible PB. Atlas de la Haute-Volta. Arbres et arbustes. Carte de répartition et de présence de 65 espèces. 1975	Georeferenced point locations created by Roeland Kindt (ICRAF) in centre of 2.5 minutes AFRICLIM grid cells
Acacia senegal	0.354167	12.3542	Terrible tree species distribution map - georeferenced in Google Earth by Tor-Gunnar Vagen (ICRAF)	Terrible PB. Atlas de la Haute-Volta. Arbres et arbustes. Carte de répartition et de présence de 65 espèces. 1975	Georeferenced point locations created by Roeland Kindt (ICRAF) in centre of 2.5 minutes AFRICLIM grid cells
Acacia senegal	0.354167	12.4375	Terrible tree species distribution map - georeferenced in Google Earth by Tor-Gunnar Vagen (ICRAF)	Terrible PB. Atlas de la Haute-Volta. Arbres et arbustes. Carte de répartition et de présence de 65 espèces. 1975	Georeferenced point locations created by Roeland Kindt (ICRAF) in centre of 2.5 minutes AFRICLIM grid cells
Acacia senegal	-0.1875	12.0625	Terrible tree species distribution map - georeferenced in Google Earth by Tor-Gunnar Vagen (ICRAF)	Terrible PB. Atlas de la Haute-Volta. Arbres et arbustes. Carte de répartition et de présence de 65 espèces. 1975	Georeferenced point locations created by Roeland Kindt (ICRAF) in centre of 2.5 minutes AFRICLIM grid cells
Acacia senegal	-0.145833	12.0208	Terrible tree species distribution map - georeferenced in Google Earth by Tor-Gunnar Vagen (ICRAF)	Terrible PB. Atlas de la Haute-Volta. Arbres et arbustes. Carte de répartition et de présence de 65 espèces. 1975	Georeferenced point locations created by Roeland Kindt (ICRAF) in centre of 2.5 minutes AFRICLIM grid cells
Acacia senegal	0.270833	11.8542	Terrible tree species distribution map - georeferenced in Google Earth by Tor-Gunnar Vagen (ICRAF)	Terrible PB. Atlas de la Haute-Volta. Arbres et arbustes. Carte de répartition et de présence de 65 espèces. 1975	Georeferenced point locations created by Roeland Kindt (ICRAF) in centre of 2.5 minutes AFRICLIM grid cells
Acacia senegal	-0.104167	11.6458	Terrible tree species distribution map - georeferenced in Google Earth by Tor-Gunnar Vagen (ICRAF)	Terrible PB. Atlas de la Haute-Volta. Arbres et arbustes. Carte de répartition et de présence de 65 espèces. 1975	Georeferenced point locations created by Roeland Kindt (ICRAF) in centre of 2.5 minutes AFRICLIM grid cells
Acacia senegal	-0.145833	11.6875	Terrible tree species distribution map - georeferenced in Google Earth by Tor-Gunnar Vagen (ICRAF)	Terrible PB. Atlas de la Haute-Volta. Arbres et arbustes. Carte de répartition et de présence de 65 espèces. 1975	Georeferenced point locations created by Roeland Kindt (ICRAF) in centre of 2.5 minutes AFRICLIM grid cells
Acacia senegal	-0.270833	11.7292	Terrible tree species distribution map - georeferenced in Google Earth by Tor-Gunnar Vagen (ICRAF)	Terrible PB. Atlas de la Haute-Volta. Arbres et arbustes. Carte de répartition et de présence de 65 espèces. 1975	Georeferenced point locations created by Roeland Kindt (ICRAF) in centre of 2.5 minutes AFRICLIM grid cells
Acacia senegal	-0.4375	12.6875	Terrible tree species distribution map - georeferenced in Google Earth by Tor-Gunnar Vagen (ICRAF)	Terrible PB. Atlas de la Haute-Volta. Arbres et arbustes. Carte de répartition et de présence de 65 espèces. 1975	Georeferenced point locations created by Roeland Kindt (ICRAF) in centre of 2.5 minutes AFRICLIM grid cells
Acacia senegal	-1.27083	11.8125	Terrible tree species distribution map - georeferenced in Google Earth by Tor-Gunnar Vagen (ICRAF)	Terrible PB. Atlas de la Haute-Volta. Arbres et arbustes. Carte de répartition et de présence de 65 espèces. 1975	Georeferenced point locations created by Roeland Kindt (ICRAF) in centre of 2.5 minutes AFRICLIM grid cells
Acacia senegal	-1.5625	11.9375	Terrible tree species distribution map - georeferenced in Google Earth by Tor-Gunnar Vagen (ICRAF)	Terrible PB. Atlas de la Haute-Volta. Arbres et arbustes. Carte de répartition et de présence de 65 espèces. 1975	Georeferenced point locations created by Roeland Kindt (ICRAF) in centre of 2.5 minutes AFRICLIM grid cells
Acacia senegal	-1.3125	12.0208	Terrible tree species distribution map - georeferenced in Google Earth by Tor-Gunnar Vagen (ICRAF)	Terrible PB. Atlas de la Haute-Volta. Arbres et arbustes. Carte de répartition et de présence de 65 espèces. 1975	Georeferenced point locations created by Roeland Kindt (ICRAF) in centre of 2.5 minutes AFRICLIM grid cells
Acacia senegal	-1.0625	12.3542	Terrible tree species distribution map - georeferenced in Google Earth by Tor-Gunnar Vagen (ICRAF)	Terrible PB. Atlas de la Haute-Volta. Arbres et arbustes. Carte de répartition et de présence de 65 espèces. 1975	Georeferenced point locations created by Roeland Kindt (ICRAF) in centre of 2.5 minutes AFRICLIM grid cells
Acacia senegal	-1.47917	12.3125	Terrible tree species distribution map - georeferenced in Google Earth by Tor-Gunnar Vagen (ICRAF)	Terrible PB. Atlas de la Haute-Volta. Arbres et arbustes. Carte de répartition et de présence de 65 espèces. 1975	Georeferenced point locations created by Roeland Kindt (ICRAF) in centre of 2.5 minutes AFRICLIM grid cells
Acacia senegal	-1.14583	12.4375	Terrible tree species distribution map - georeferenced in Google Earth by Tor-Gunnar Vagen (ICRAF)	Terrible PB. Atlas de la Haute-Volta. Arbres et arbustes. Carte de répartition et de présence de 65 espèces. 1975	Georeferenced point locations created by Roeland Kindt (ICRAF) in centre of 2.5 minutes AFRICLIM grid cells
Acacia senegal	-1.60417	13.4792	Terrible tree species distribution map - georeferenced in Google Earth by Tor-Gunnar Vagen (ICRAF)	Terrible PB. Atlas de la Haute-Volta. Arbres et arbustes. Carte de répartition et de présence de 65 espèces. 1975	Georeferenced point locations created by Roeland Kindt (ICRAF) in centre of 2.5 minutes AFRICLIM grid cells
Acacia senegal	-1.5625	13.3958	Terrible tree species distribution map - georeferenced in Google Earth by Tor-Gunnar Vagen (ICRAF)	Terrible PB. Atlas de la Haute-Volta. Arbres et arbustes. Carte de répartition et de présence de 65 espèces. 1975	Georeferenced point locations created by Roeland Kindt (ICRAF) in centre of 2.5 minutes AFRICLIM grid cells
Acacia senegal	-1.60417	11.7292	Terrible tree species distribution map - georeferenced in Google Earth by Tor-Gunnar Vagen (ICRAF)	Terrible PB. Atlas de la Haute-Volta. Arbres et arbustes. Carte de répartition et de présence de 65 espèces. 1975	Georeferenced point locations created by Roeland Kindt (ICRAF) in centre of 2.5 minutes AFRICLIM grid cells
Acacia senegal	-1.77083	11.5208	Terrible tree species distribution map - georeferenced in Google Earth by Tor-Gunnar Vagen (ICRAF)	Terrible PB. Atlas de la Haute-Volta. Arbres et arbustes. Carte de répartition et de présence de 65 espèces. 1975	Georeferenced point locations created by Roeland Kindt (ICRAF) in centre of 2.5 minutes AFRICLIM grid cells
Acacia senegal	-1.85417	11.3542	Terrible tree species distribution map - georeferenced in Google Earth by Tor-Gunnar Vagen (ICRAF)	Terrible PB. Atlas de la Haute-Volta. Arbres et arbustes. Carte de répartition et de présence de 65 espèces. 1975	Georeferenced point locations created by Roeland Kindt (ICRAF) in centre of 2.5 minutes AFRICLIM grid cells
Acacia senegal	-1.89583	11.3125	Terrible tree species distribution map - georeferenced in Google Earth by Tor-Gunnar Vagen (ICRAF)	Terrible PB. Atlas de la Haute-Volta. Arbres et arbustes. Carte de répartition et de présence de 65 espèces. 1975	Georeferenced point locations created by Roeland Kindt (ICRAF) in centre of 2.5 minutes AFRICLIM grid cells
Acacia senegal	-2.02083	11.1875	Terrible tree species distribution map - georeferenced in Google Earth by Tor-Gunnar Vagen (ICRAF)	Terrible PB. Atlas de la Haute-Volta. Arbres et arbustes. Carte de répartition et de présence de 65 espèces. 1975	Georeferenced point locations created by Roeland Kindt (ICRAF) in centre of 2.5 minutes AFRICLIM grid cells
Acacia senegal	-2.0625	11.1458	Terrible tree species distribution map - georeferenced in Google Earth by Tor-Gunnar Vagen (ICRAF)	Terrible PB. Atlas de la Haute-Volta. Arbres et arbustes. Carte de répartition et de présence de 65 espèces. 1975	Georeferenced point locations created by Roeland Kindt (ICRAF) in centre of 2.5 minutes AFRICLIM grid cells
Acacia senegal	-2.27083	11.1042	Terrible tree species distribution map - georeferenced in Google Earth by Tor-Gunnar Vagen (ICRAF)	Terrible PB. Atlas de la Haute-Volta. Arbres et arbustes. Carte de répartition et de présence de 65 espèces. 1975	Georeferenced point locations created by Roeland Kindt (ICRAF) in centre of 2.5 minutes AFRICLIM grid cells
Acacia senegal	-2.4375	11.0625	Terrible tree species distribution map - georeferenced in Google Earth by Tor-Gunnar Vagen (ICRAF)	Terrible PB. Atlas de la Haute-Volta. Arbres et arbustes. Carte de répartition et de présence de 65 espèces. 1975	Georeferenced point locations created by Roeland Kindt (ICRAF) in centre of 2.5 minutes AFRICLIM grid cells
Acacia senegal	-2.52083	11.0208	Terrible tree species distribution map - georeferenced in Google Earth by Tor-Gunnar Vagen (ICRAF)	Terrible PB. Atlas de la Haute-Volta. Arbres et arbustes. Carte de répartition et de présence de 65 espèces. 1975	Georeferenced point locations created by Roeland Kindt (ICRAF) in centre of 2.5 minutes AFRICLIM grid cells
Acacia senegal	-2.64583	11.0208	Terrible tree species distribution map - georeferenced in Google Earth by Tor-Gunnar Vagen (ICRAF)	Terrible PB. Atlas de la Haute-Volta. Arbres et arbustes. Carte de répartition et de présence de 65 espèces. 1975	Georeferenced point locations created by Roeland Kindt (ICRAF) in centre of 2.5 minutes AFRICLIM grid cells
Acacia senegal	-2.72917	11.0625	Terrible tree species distribution map - georeferenced in Google Earth by Tor-Gunnar Vagen (ICRAF)	Terrible PB. Atlas de la Haute-Volta. Arbres et arbustes. Carte de répartition et de présence de 65 espèces. 1975	Georeferenced point locations created by Roeland Kindt (ICRAF) in centre of 2.5 minutes AFRICLIM grid cells
Acacia senegal	-2.14583	11.3125	Terrible tree species distribution map - georeferenced in Google Earth by Tor-Gunnar Vagen (ICRAF)	Terrible PB. Atlas de la Haute-Volta. Arbres et arbustes. Carte de répartition et de présence de 65 espèces. 1975	Georeferenced point locations created by Roeland Kindt (ICRAF) in centre of 2.5 minutes AFRICLIM grid cells
Acacia senegal	-2.1875	11.4792	Terrible tree species distribution map - georeferenced in Google Earth by Tor-Gunnar Vagen (ICRAF)	Terrible PB. Atlas de la Haute-Volta. Arbres et arbustes. Carte de répartition et de présence de 65 espèces. 1975	Georeferenced point locations created by Roeland Kindt (ICRAF) in centre of 2.5 minutes AFRICLIM grid cells
Acacia senegal	-2.1875	11.6458	Terrible tree species distribution map - georeferenced in Google Earth by Tor-Gunnar Vagen (ICRAF)	Terrible PB. Atlas de la Haute-Volta. Arbres et arbustes. Carte de répartition et de présence de 65 espèces. 1975	Georeferenced point locations created by Roeland Kindt (ICRAF) in centre of 2.5 minutes AFRICLIM grid cells
Acacia senegal	-2.1875	11.8958	Terrible tree species distribution map - georeferenced in Google Earth by Tor-Gunnar Vagen (ICRAF)	Terrible PB. Atlas de la Haute-Volta. Arbres et arbustes. Carte de répartition et de présence de 65 espèces. 1975	Georeferenced point locations created by Roeland Kindt (ICRAF) in centre of 2.5 minutes AFRICLIM grid cells
Acacia senegal	-2.52083	11.9792	Terrible tree species distribution map - georeferenced in Google Earth by Tor-Gunnar Vagen (ICRAF)	Terrible PB. Atlas de la Haute-Volta. Arbres et arbustes. Carte de répartition et de présence de 65 espèces. 1975	Georeferenced point locations created by Roeland Kindt (ICRAF) in centre of 2.5 minutes AFRICLIM grid cells
Acacia senegal	-1.6875	12.4792	Terrible tree species distribution map - georeferenced in Google Earth by Tor-Gunnar Vagen (ICRAF)	Terrible PB. Atlas de la Haute-Volta. Arbres et arbustes. Carte de répartition et de présence de 65 espèces. 1975	Georeferenced point locations created by Roeland Kindt (ICRAF) in centre of 2.5 minutes AFRICLIM grid cells
Acacia senegal	-1.52083	12.8125	Terrible tree species distribution map - georeferenced in Google Earth by Tor-Gunnar Vagen (ICRAF)	Terrible PB. Atlas de la Haute-Volta. Arbres et arbustes. Carte de répartition et de présence de 65 espèces. 1975	Georeferenced point locations created by Roeland Kindt (ICRAF) in centre of 2.5 minutes AFRICLIM grid cells
Acacia senegal	-1.47917	12.9375	Terrible tree species distribution map - georeferenced in Google Earth by Tor-Gunnar Vagen (ICRAF)	Terrible PB. Atlas de la Haute-Volta. Arbres et arbustes. Carte de répartition et de présence de 65 espèces. 1975	Georeferenced point locations created by Roeland Kindt (ICRAF) in centre of 2.5 minutes AFRICLIM grid cells
Acacia senegal	-1.52083	12.9792	Terrible tree species distribution map - georeferenced in Google Earth by Tor-Gunnar Vagen (ICRAF)	Terrible PB. Atlas de la Haute-Volta. Arbres et arbustes. Carte de répartition et de présence de 65 espèces. 1975	Georeferenced point locations created by Roeland Kindt (ICRAF) in centre of 2.5 minutes AFRICLIM grid cells
Acacia senegal	-1.5625	13.2292	Terrible tree species distribution map - georeferenced in Google Earth by Tor-Gunnar Vagen (ICRAF)	Terrible PB. Atlas de la Haute-Volta. Arbres et arbustes. Carte de répartition et de présence de 65 espèces. 1975	Georeferenced point locations created by Roeland Kindt (ICRAF) in centre of 2.5 minutes AFRICLIM grid cells
Acacia senegal	-1.85417	13.3542	Terrible tree species distribution map - georeferenced in Google Earth by Tor-Gunnar Vagen (ICRAF)	Terrible PB. Atlas de la Haute-Volta. Arbres et arbustes. Carte de répartition et de présence de 65 espèces. 1975	Georeferenced point locations created by Roeland Kindt (ICRAF) in centre of 2.5 minutes AFRICLIM grid cells
Acacia senegal	-2.0625	13.4792	Terrible tree species distribution map - georeferenced in Google Earth by Tor-Gunnar Vagen (ICRAF)	Terrible PB. Atlas de la Haute-Volta. Arbres et arbustes. Carte de répartition et de présence de 65 espèces. 1975	Georeferenced point locations created by Roeland Kindt (ICRAF) in centre of 2.5 minutes AFRICLIM grid cells
Acacia senegal	-1.97917	13.8542	Terrible tree species distribution map - georeferenced in Google Earth by Tor-Gunnar Vagen (ICRAF)	Terrible PB. Atlas de la Haute-Volta. Arbres et arbustes. Carte de répartition et de présence de 65 espèces. 1975	Georeferenced point locations created by Roeland Kindt (ICRAF) in centre of 2.5 minutes AFRICLIM grid cells
Acacia senegal	-1.89583	13.0208	Terrible tree species distribution map - georeferenced in Google Earth by Tor-Gunnar Vagen (ICRAF)	Terrible PB. Atlas de la Haute-Volta. Arbres et arbustes. Carte de répartition et de présence de 65 espèces. 1975	Georeferenced point locations created by Roeland Kindt (ICRAF) in centre of 2.5 minutes AFRICLIM grid cells
Acacia senegal	-2.0625	13.0208	Terrible tree species distribution map - georeferenced in Google Earth by Tor-Gunnar Vagen (ICRAF)	Terrible PB. Atlas de la Haute-Volta. Arbres et arbustes. Carte de répartition et de présence de 65 espèces. 1975	Georeferenced point locations created by Roeland Kindt (ICRAF) in centre of 2.5 minutes AFRICLIM grid cells
Acacia senegal	-2.60417	13.3958	Terrible tree species distribution map - georeferenced in Google Earth by Tor-Gunnar Vagen (ICRAF)	Terrible PB. Atlas de la Haute-Volta. Arbres et arbustes. Carte de répartition et de présence de 65 espèces. 1975	Georeferenced point locations created by Roeland Kindt (ICRAF) in centre of 2.5 minutes AFRICLIM grid cells
Acacia senegal	-2.27083	12.1042	Terrible tree species distribution map - georeferenced in Google Earth by Tor-Gunnar Vagen (ICRAF)	Terrible PB. Atlas de la Haute-Volta. Arbres et arbustes. Carte de répartition et de présence de 65 espèces. 1975	Georeferenced point locations created by Roeland Kindt (ICRAF) in centre of 2.5 minutes AFRICLIM grid cells
Acacia senegal	-2.97917	11.8958	Terrible tree species distribution map - georeferenced in Google Earth by Tor-Gunnar Vagen (ICRAF)	Terrible PB. Atlas de la Haute-Volta. Arbres et arbustes. Carte de répartition et de présence de 65 espèces. 1975	Georeferenced point locations created by Roeland Kindt (ICRAF) in centre of 2.5 minutes AFRICLIM grid cells
Acacia senegal	-2.64583	11.8125	Terrible tree species distribution map - georeferenced in Google Earth by Tor-Gunnar Vagen (ICRAF)	Terrible PB. Atlas de la Haute-Volta. Arbres et arbustes. Carte de répartition et de présence de 65 espèces. 1975	Georeferenced point locations created by Roeland Kindt (ICRAF) in centre of 2.5 minutes AFRICLIM grid cells
Acacia senegal	-2.72917	11.6875	Terrible tree species distribution map - georeferenced in Google Earth by Tor-Gunnar Vagen (ICRAF)	Terrible PB. Atlas de la Haute-Volta. Arbres et arbustes. Carte de répartition et de présence de 65 espèces. 1975	Georeferenced point locations created by Roeland Kindt (ICRAF) in centre of 2.5 minutes AFRICLIM grid cells
Acacia senegal	-3.02083	11.7292	Terrible tree species distribution map - georeferenced in Google Earth by Tor-Gunnar Vagen (ICRAF)	Terrible PB. Atlas de la Haute-Volta. Arbres et arbustes. Carte de répartition et de présence de 65 espèces. 1975	Georeferenced point locations created by Roeland Kindt (ICRAF) in centre of 2.5 minutes AFRICLIM grid cells
Acacia senegal	-2.77083	11.5625	Terrible tree species distribution map - georeferenced in Google Earth by Tor-Gunnar Vagen (ICRAF)	Terrible PB. Atlas de la Haute-Volta. Arbres et arbustes. Carte de répartition et de présence de 65 espèces. 1975	Georeferenced point locations created by Roeland Kindt (ICRAF) in centre of 2.5 minutes AFRICLIM grid cells
Acacia senegal	-2.97917	11.8125	Terrible tree species distribution map - georeferenced in Google Earth by Tor-Gunnar Vagen (ICRAF)	Terrible PB. Atlas de la Haute-Volta. Arbres et arbustes. Carte de répartition et de présence de 65 espèces. 1975	Georeferenced point locations created by Roeland Kindt (ICRAF) in centre of 2.5 minutes AFRICLIM grid cells
Acacia senegal	-3.89583	13.0208	Terrible tree species distribution map - georeferenced in Google Earth by Tor-Gunnar Vagen (ICRAF)	Terrible PB. Atlas de la Haute-Volta. Arbres et arbustes. Carte de répartition et de présence de 65 espèces. 1975	Georeferenced point locations created by Roeland Kindt (ICRAF) in centre of 2.5 minutes AFRICLIM grid cells
Acacia senegal	-3.9375	12.9792	Terrible tree species distribution map - georeferenced in Google Earth by Tor-Gunnar Vagen (ICRAF)	Terrible PB. Atlas de la Haute-Volta. Arbres et arbustes. Carte de répartition et de présence de 65 espèces. 1975	Georeferenced point locations created by Roeland Kindt (ICRAF) in centre of 2.5 minutes AFRICLIM grid cells
Acacia senegal	-3.8125	13.0208	Terrible tree species distribution map - georeferenced in Google Earth by Tor-Gunnar Vagen (ICRAF)	Terrible PB. Atlas de la Haute-Volta. Arbres et arbustes. Carte de répartition et de présence de 65 espèces. 1975	Georeferenced point locations created by Roeland Kindt (ICRAF) in centre of 2.5 minutes AFRICLIM grid cells
Acacia senegal	-3.6875	12.8125	Terrible tree species distribution map - georeferenced in Google Earth by Tor-Gunnar Vagen (ICRAF)	Terrible PB. Atlas de la Haute-Volta. Arbres et arbustes. Carte de répartition et de présence de 65 espèces. 1975	Georeferenced point locations created by Roeland Kindt (ICRAF) in centre of 2.5 minutes AFRICLIM grid cells
Acacia senegal	-3.60417	12.8125	Terrible tree species distribution map - georeferenced in Google Earth by Tor-Gunnar Vagen (ICRAF)	Terrible PB. Atlas de la Haute-Volta. Arbres et arbustes. Carte de répartition et de présence de 65 espèces. 1975	Georeferenced point locations created by Roeland Kindt (ICRAF) in centre of 2.5 minutes AFRICLIM grid cells
Acacia senegal	-3.8125	12.4375	Terrible tree species distribution map - georeferenced in Google Earth by Tor-Gunnar Vagen (ICRAF)	Terrible PB. Atlas de la Haute-Volta. Arbres et arbustes. Carte de répartition et de présence de 65 espèces. 1975	Georeferenced point locations created by Roeland Kindt (ICRAF) in centre of 2.5 minutes AFRICLIM grid cells
Acacia senegal	-4.3125	12.0208	Terrible tree species distribution map - georeferenced in Google Earth by Tor-Gunnar Vagen (ICRAF)	Terrible PB. Atlas de la Haute-Volta. Arbres et arbustes. Carte de répartition et de présence de 65 espèces. 1975	Georeferenced point locations created by Roeland Kindt (ICRAF) in centre of 2.5 minutes AFRICLIM grid cells
Acacia senegal	-5.0625	11.8958	Terrible tree species distribution map - georeferenced in Google Earth by Tor-Gunnar Vagen (ICRAF)	Terrible PB. Atlas de la Haute-Volta. Arbres et arbustes. Carte de répartition et de présence de 65 espèces. 1975	Georeferenced point locations created by Roeland Kindt (ICRAF) in centre of 2.5 minutes AFRICLIM grid cells
Acacia senegal	-4.97917	11.8542	Terrible tree species distribution map - georeferenced in Google Earth by Tor-Gunnar Vagen (ICRAF)	Terrible PB. Atlas de la Haute-Volta. Arbres et arbustes. Carte de répartition et de présence de 65 espèces. 1975	Georeferenced point locations created by Roeland Kindt (ICRAF) in centre of 2.5 minutes AFRICLIM grid cells
Acacia senegal	-4.6875	11.6458	Terrible tree species distribution map - georeferenced in Google Earth by Tor-Gunnar Vagen (ICRAF)	Terrible PB. Atlas de la Haute-Volta. Arbres et arbustes. Carte de répartition et de présence de 65 espèces. 1975	Georeferenced point locations created by Roeland Kindt (ICRAF) in centre of 2.5 minutes AFRICLIM grid cells
Acacia senegal	-4.9375	11.1458	Terrible tree species distribution map - georeferenced in Google Earth by Tor-Gunnar Vagen (ICRAF)	Terrible PB. Atlas de la Haute-Volta. Arbres et arbustes. Carte de répartition et de présence de 65 espèces. 1975	Georeferenced point locations created by Roeland Kindt (ICRAF) in centre of 2.5 minutes AFRICLIM grid cells
Acacia senegal	-4.9375	11.1042	Terrible tree species distribution map - georeferenced in Google Earth by Tor-Gunnar Vagen (ICRAF)	Terrible PB. Atlas de la Haute-Volta. Arbres et arbustes. Carte de répartition et de présence de 65 espèces. 1975	Georeferenced point locations created by Roeland Kindt (ICRAF) in centre of 2.5 minutes AFRICLIM grid cells
Acacia senegal	-5.0625	10.5208	Terrible tree species distribution map - georeferenced in Google Earth by Tor-Gunnar Vagen (ICRAF)	Terrible PB. Atlas de la Haute-Volta. Arbres et arbustes. Carte de répartition et de présence de 65 espèces. 1975	Georeferenced point locations created by Roeland Kindt (ICRAF) in centre of 2.5 minutes AFRICLIM grid cells
Acacia senegal	-5.0625	10.6042	Terrible tree species distribution map - georeferenced in Google Earth by Tor-Gunnar Vagen (ICRAF)	Terrible PB. Atlas de la Haute-Volta. Arbres et arbustes. Carte de répartition et de présence de 65 espèces. 1975	Georeferenced point locations created by Roeland Kindt (ICRAF) in centre of 2.5 minutes AFRICLIM grid cells
Acacia senegal	-4.97917	10.4375	Terrible tree species distribution map - georeferenced in Google Earth by Tor-Gunnar Vagen (ICRAF)	Terrible PB. Atlas de la Haute-Volta. Arbres et arbustes. Carte de répartition et de présence de 65 espèces. 1975	Georeferenced point locations created by Roeland Kindt (ICRAF) in centre of 2.5 minutes AFRICLIM grid cells
Acacia senegal	-4.97917	10.3542	Terrible tree species distribution map - georeferenced in Google Earth by Tor-Gunnar Vagen (ICRAF)	Terrible PB. Atlas de la Haute-Volta. Arbres et arbustes. Carte de répartition et de présence de 65 espèces. 1975	Georeferenced point locations created by Roeland Kindt (ICRAF) in centre of 2.5 minutes AFRICLIM grid cells
Acacia senegal	-4.97917	10.1875	Terrible tree species distribution map - georeferenced in Google Earth by Tor-Gunnar Vagen (ICRAF)	Terrible PB. Atlas de la Haute-Volta. Arbres et arbustes. Carte de répartition et de présence de 65 espèces. 1975	Georeferenced point locations created by Roeland Kindt (ICRAF) in centre of 2.5 minutes AFRICLIM grid cells
Acacia senegal	-4.89583	10.2708	Terrible tree species distribution map - georeferenced in Google Earth by Tor-Gunnar Vagen (ICRAF)	Terrible PB. Atlas de la Haute-Volta. Arbres et arbustes. Carte de répartition et de présence de 65 espèces. 1975	Georeferenced point locations created by Roeland Kindt (ICRAF) in centre of 2.5 minutes AFRICLIM grid cells
Acacia senegal	-4.64583	10.6458	Terrible tree species distribution map - georeferenced in Google Earth by Tor-Gunnar Vagen (ICRAF)	Terrible PB. Atlas de la Haute-Volta. Arbres et arbustes. Carte de répartition et de présence de 65 espèces. 1975	Georeferenced point locations created by Roeland Kindt (ICRAF) in centre of 2.5 minutes AFRICLIM grid cells
Acacia senegal	-4.47917	10.6458	Terrible tree species distribution map - georeferenced in Google Earth by Tor-Gunnar Vagen (ICRAF)	Terrible PB. Atlas de la Haute-Volta. Arbres et arbustes. Carte de répartition et de présence de 65 espèces. 1975	Georeferenced point locations created by Roeland Kindt (ICRAF) in centre of 2.5 minutes AFRICLIM grid cells
Acacia senegal	-4.89583	10.6458	Terrible tree species distribution map - georeferenced in Google Earth by Tor-Gunnar Vagen (ICRAF)	Terrible PB. Atlas de la Haute-Volta. Arbres et arbustes. Carte de répartition et de présence de 65 espèces. 1975	Georeferenced point locations created by Roeland Kindt (ICRAF) in centre of 2.5 minutes AFRICLIM grid cells
Acacia senegal	-3.14583	13.4375	Terrible tree species distribution map - georeferenced in Google Earth by Tor-Gunnar Vagen (ICRAF)	Terrible PB. Atlas de la Haute-Volta. Arbres et arbustes. Carte de répartition et de présence de 65 espèces. 1975	Georeferenced point locations created by Roeland Kindt (ICRAF) in centre of 2.5 minutes AFRICLIM grid cells
Acacia senegal	-3.47917	12.8125	Terrible tree species distribution map - georeferenced in Google Earth by Tor-Gunnar Vagen (ICRAF)	Terrible PB. Atlas de la Haute-Volta. Arbres et arbustes. Carte de répartition et de présence de 65 espèces. 1975	Georeferenced point locations created by Roeland Kindt (ICRAF) in centre of 2.5 minutes AFRICLIM grid cells
Acacia senegal	-3.4375	12.8125	Terrible tree species distribution map - georeferenced in Google Earth by Tor-Gunnar Vagen (ICRAF)	Terrible PB. Atlas de la Haute-Volta. Arbres et arbustes. Carte de répartition et de présence de 65 espèces. 1975	Georeferenced point locations created by Roeland Kindt (ICRAF) in centre of 2.5 minutes AFRICLIM grid cells
Acacia senegal	-3.97917	12.2292	Terrible tree species distribution map - georeferenced in Google Earth by Tor-Gunnar Vagen (ICRAF)	Terrible PB. Atlas de la Haute-Volta. Arbres et arbustes. Carte de répartition et de présence de 65 espèces. 1975	Georeferenced point locations created by Roeland Kindt (ICRAF) in centre of 2.5 minutes AFRICLIM grid cells
Acacia senegal	-4.35417	11.8958	Terrible tree species distribution map - georeferenced in Google Earth by Tor-Gunnar Vagen (ICRAF)	Terrible PB. Atlas de la Haute-Volta. Arbres et arbustes. Carte de répartition et de présence de 65 espèces. 1975	Georeferenced point locations created by Roeland Kindt (ICRAF) in centre of 2.5 minutes AFRICLIM grid cells
Acacia senegal	-4.35417	11.1875	Terrible tree species distribution map - georeferenced in Google Earth by Tor-Gunnar Vagen (ICRAF)	Terrible PB. Atlas de la Haute-Volta. Arbres et arbustes. Carte de répartition et de présence de 65 espèces. 1975	Georeferenced point locations created by Roeland Kindt (ICRAF) in centre of 2.5 minutes AFRICLIM grid cells
Acacia senegal	-4.4375	11.1458	Terrible tree species distribution map - georeferenced in Google Earth by Tor-Gunnar Vagen (ICRAF)	Terrible PB. Atlas de la Haute-Volta. Arbres et arbustes. Carte de répartition et de présence de 65 espèces. 1975	Georeferenced point locations created by Roeland Kindt (ICRAF) in centre of 2.5 minutes AFRICLIM grid cells
Acacia senegal	-4.39583	11.1458	Terrible tree species distribution map - georeferenced in Google Earth by Tor-Gunnar Vagen (ICRAF)	Terrible PB. Atlas de la Haute-Volta. Arbres et arbustes. Carte de répartition et de présence de 65 espèces. 1975	Georeferenced point locations created by Roeland Kindt (ICRAF) in centre of 2.5 minutes AFRICLIM grid cells
Acacia senegal	-4.5625	11.1042	Terrible tree species distribution map - georeferenced in Google Earth by Tor-Gunnar Vagen (ICRAF)	Terrible PB. Atlas de la Haute-Volta. Arbres et arbustes. Carte de répartition et de présence de 65 espèces. 1975	Georeferenced point locations created by Roeland Kindt (ICRAF) in centre of 2.5 minutes AFRICLIM grid cells
Acacia senegal	-4.6875	11.0625	Terrible tree species distribution map - georeferenced in Google Earth by Tor-Gunnar Vagen (ICRAF)	Terrible PB. Atlas de la Haute-Volta. Arbres et arbustes. Carte de répartition et de présence de 65 espèces. 1975	Georeferenced point locations created by Roeland Kindt (ICRAF) in centre of 2.5 minutes AFRICLIM grid cells
Acacia senegal	-4.77083	11.0625	Terrible tree species distribution map - georeferenced in Google Earth by Tor-Gunnar Vagen (ICRAF)	Terrible PB. Atlas de la Haute-Volta. Arbres et arbustes. Carte de répartition et de présence de 65 espèces. 1975	Georeferenced point locations created by Roeland Kindt (ICRAF) in centre of 2.5 minutes AFRICLIM grid cells
Acacia senegal	-3.64583	10.3125	Terrible tree species distribution map - georeferenced in Google Earth by Tor-Gunnar Vagen (ICRAF)	Terrible PB. Atlas de la Haute-Volta. Arbres et arbustes. Carte de répartition et de présence de 65 espèces. 1975	Georeferenced point locations created by Roeland Kindt (ICRAF) in centre of 2.5 minutes AFRICLIM grid cells
Acacia senegal	-3.4375	10.1042	Terrible tree species distribution map - georeferenced in Google Earth by Tor-Gunnar Vagen (ICRAF)	Terrible PB. Atlas de la Haute-Volta. Arbres et arbustes. Carte de répartition et de présence de 65 espèces. 1975	Georeferenced point locations created by Roeland Kindt (ICRAF) in centre of 2.5 minutes AFRICLIM grid cells
Acacia senegal	-3.39583	10.0625	Terrible tree species distribution map - georeferenced in Google Earth by Tor-Gunnar Vagen (ICRAF)	Terrible PB. Atlas de la Haute-Volta. Arbres et arbustes. Carte de répartition et de présence de 65 espèces. 1975	Georeferenced point locations created by Roeland Kindt (ICRAF) in centre of 2.5 minutes AFRICLIM grid cells
Acacia senegal	-4.3125	10.6875	Terrible tree species distribution map - georeferenced in Google Earth by Tor-Gunnar Vagen (ICRAF)	Terrible PB. Atlas de la Haute-Volta. Arbres et arbustes. Carte de répartition et de présence de 65 espèces. 1975	Georeferenced point locations created by Roeland Kindt (ICRAF) in centre of 2.5 minutes AFRICLIM grid cells
Acacia senegal	-4.10417	10.5625	Terrible tree species distribution map - georeferenced in Google Earth by Tor-Gunnar Vagen (ICRAF)	Terrible PB. Atlas de la Haute-Volta. Arbres et arbustes. Carte de répartition et de présence de 65 espèces. 1975	Georeferenced point locations created by Roeland Kindt (ICRAF) in centre of 2.5 minutes AFRICLIM grid cells
Acacia senegal	-3.22917	10.6042	Terrible tree species distribution map - georeferenced in Google Earth by Tor-Gunnar Vagen (ICRAF)	Terrible PB. Atlas de la Haute-Volta. Arbres et arbustes. Carte de répartition et de présence de 65 espèces. 1975	Georeferenced point locations created by Roeland Kindt (ICRAF) in centre of 2.5 minutes AFRICLIM grid cells
Acacia senegal	-3.22917	10.2708	Terrible tree species distribution map - georeferenced in Google Earth by Tor-Gunnar Vagen (ICRAF)	Terrible PB. Atlas de la Haute-Volta. Arbres et arbustes. Carte de répartition et de présence de 65 espèces. 1975	Georeferenced point locations created by Roeland Kindt (ICRAF) in centre of 2.5 minutes AFRICLIM grid cells
Acacia senegal	-3.3125	10.2292	Terrible tree species distribution map - georeferenced in Google Earth by Tor-Gunnar Vagen (ICRAF)	Terrible PB. Atlas de la Haute-Volta. Arbres et arbustes. Carte de répartition et de présence de 65 espèces. 1975	Georeferenced point locations created by Roeland Kindt (ICRAF) in centre of 2.5 minutes AFRICLIM grid cells
Acacia senegal	-3.0625	10.2708	Terrible tree species distribution map - georeferenced in Google Earth by Tor-Gunnar Vagen (ICRAF)	Terrible PB. Atlas de la Haute-Volta. Arbres et arbustes. Carte de répartition et de présence de 65 espèces. 1975	Georeferenced point locations created by Roeland Kindt (ICRAF) in centre of 2.5 minutes AFRICLIM grid cells
Acacia senegal	-2.9375	10.1042	Terrible tree species distribution map - georeferenced in Google Earth by Tor-Gunnar Vagen (ICRAF)	Terrible PB. Atlas de la Haute-Volta. Arbres et arbustes. Carte de répartition et de présence de 65 espèces. 1975	Georeferenced point locations created by Roeland Kindt (ICRAF) in centre of 2.5 minutes AFRICLIM grid cells
Acacia senegal	-2.89583	10.0208	Terrible tree species distribution map - georeferenced in Google Earth by Tor-Gunnar Vagen (ICRAF)	Terrible PB. Atlas de la Haute-Volta. Arbres et arbustes. Carte de répartition et de présence de 65 espèces. 1975	Georeferenced point locations created by Roeland Kindt (ICRAF) in centre of 2.5 minutes AFRICLIM grid cells
Acacia senegal	-4.22917	11.1458	Terrible tree species distribution map - georeferenced in Google Earth by Tor-Gunnar Vagen (ICRAF)	Terrible PB. Atlas de la Haute-Volta. Arbres et arbustes. Carte de répartition et de présence de 65 espèces. 1975	Georeferenced point locations created by Roeland Kindt (ICRAF) in centre of 2.5 minutes AFRICLIM grid cells
Acacia senegal	-4.1875	11.1458	Terrible tree species distribution map - georeferenced in Google Earth by Tor-Gunnar Vagen (ICRAF)	Terrible PB. Atlas de la Haute-Volta. Arbres et arbustes. Carte de répartition et de présence de 65 espèces. 1975	Georeferenced point locations created by Roeland Kindt (ICRAF) in centre of 2.5 minutes AFRICLIM grid cells
Acacia senegal	-4.14583	11.1875	Terrible tree species distribution map - georeferenced in Google Earth by Tor-Gunnar Vagen (ICRAF)	Terrible PB. Atlas de la Haute-Volta. Arbres et arbustes. Carte de répartition et de présence de 65 espèces. 1975	Georeferenced point locations created by Roeland Kindt (ICRAF) in centre of 2.5 minutes AFRICLIM grid cells
Acacia senegal	-3.8125	10.8958	Terrible tree species distribution map - georeferenced in Google Earth by Tor-Gunnar Vagen (ICRAF)	Terrible PB. Atlas de la Haute-Volta. Arbres et arbustes. Carte de répartition et de présence de 65 espèces. 1975	Georeferenced point locations created by Roeland Kindt (ICRAF) in centre of 2.5 minutes AFRICLIM grid cells
Acacia senegal	-3.72917	10.9375	Terrible tree species distribution map - georeferenced in Google Earth by Tor-Gunnar Vagen (ICRAF)	Terrible PB. Atlas de la Haute-Volta. Arbres et arbustes. Carte de répartition et de présence de 65 espèces. 1975	Georeferenced point locations created by Roeland Kindt (ICRAF) in centre of 2.5 minutes AFRICLIM grid cells
Acacia senegal	-3.64583	10.9375	Terrible tree species distribution map - georeferenced in Google Earth by Tor-Gunnar Vagen (ICRAF)	Terrible PB. Atlas de la Haute-Volta. Arbres et arbustes. Carte de répartition et de présence de 65 espèces. 1975	Georeferenced point locations created by Roeland Kindt (ICRAF) in centre of 2.5 minutes AFRICLIM grid cells
Acacia senegal	-3.27083	10.9375	Terrible tree species distribution map - georeferenced in Google Earth by Tor-Gunnar Vagen (ICRAF)	Terrible PB. Atlas de la Haute-Volta. Arbres et arbustes. Carte de répartition et de présence de 65 espèces. 1975	Georeferenced point locations created by Roeland Kindt (ICRAF) in centre of 2.5 minutes AFRICLIM grid cells
Acacia senegal	-3.22917	10.9792	Terrible tree species distribution map - georeferenced in Google Earth by Tor-Gunnar Vagen (ICRAF)	Terrible PB. Atlas de la Haute-Volta. Arbres et arbustes. Carte de répartition et de présence de 65 espèces. 1975	Georeferenced point locations created by Roeland Kindt (ICRAF) in centre of 2.5 minutes AFRICLIM grid cells
Acacia senegal	-3.27083	10.9792	Terrible tree species distribution map - georeferenced in Google Earth by Tor-Gunnar Vagen (ICRAF)	Terrible PB. Atlas de la Haute-Volta. Arbres et arbustes. Carte de répartition et de présence de 65 espèces. 1975	Georeferenced point locations created by Roeland Kindt (ICRAF) in centre of 2.5 minutes AFRICLIM grid cells
Acacia senegal	-2.89583	11.0208	Terrible tree species distribution map - georeferenced in Google Earth by Tor-Gunnar Vagen (ICRAF)	Terrible PB. Atlas de la Haute-Volta. Arbres et arbustes. Carte de répartition et de présence de 65 espèces. 1975	Georeferenced point locations created by Roeland Kindt (ICRAF) in centre of 2.5 minutes AFRICLIM grid cells
Acacia senegal	-3.8125	11.1875	Terrible tree species distribution map - georeferenced in Google Earth by Tor-Gunnar Vagen (ICRAF)	Terrible PB. Atlas de la Haute-Volta. Arbres et arbustes. Carte de répartition et de présence de 65 espèces. 1975	Georeferenced point locations created by Roeland Kindt (ICRAF) in centre of 2.5 minutes AFRICLIM grid cells
Acacia senegal	-3.85417	11.1875	Terrible tree species distribution map - georeferenced in Google Earth by Tor-Gunnar Vagen (ICRAF)	Terrible PB. Atlas de la Haute-Volta. Arbres et arbustes. Carte de répartition et de présence de 65 espèces. 1975	Georeferenced point locations created by Roeland Kindt (ICRAF) in centre of 2.5 minutes AFRICLIM grid cells
Acacia senegal	-3.9375	11.1875	Terrible tree species distribution map - georeferenced in Google Earth by Tor-Gunnar Vagen (ICRAF)	Terrible PB. Atlas de la Haute-Volta. Arbres et arbustes. Carte de répartition et de présence de 65 espèces. 1975	Georeferenced point locations created by Roeland Kindt (ICRAF) in centre of 2.5 minutes AFRICLIM grid cells
Acacia senegal	-3.5625	12.3542	Terrible tree species distribution map - georeferenced in Google Earth by Tor-Gunnar Vagen (ICRAF)	Terrible PB. Atlas de la Haute-Volta. Arbres et arbustes. Carte de répartition et de présence de 65 espèces. 1975	Georeferenced point locations created by Roeland Kindt (ICRAF) in centre of 2.5 minutes AFRICLIM grid cells
Acacia senegal	-3.14583	13.2292	Terrible tree species distribution map - georeferenced in Google Earth by Tor-Gunnar Vagen (ICRAF)	Terrible PB. Atlas de la Haute-Volta. Arbres et arbustes. Carte de répartition et de présence de 65 espèces. 1975	Georeferenced point locations created by Roeland Kindt (ICRAF) in centre of 2.5 minutes AFRICLIM grid cells
Acacia senegal	-3.0625	13.1042	Terrible tree species distribution map - georeferenced in Google Earth by Tor-Gunnar Vagen (ICRAF)	Terrible PB. Atlas de la Haute-Volta. Arbres et arbustes. Carte de répartition et de présence de 65 espèces. 1975	Georeferenced point locations created by Roeland Kindt (ICRAF) in centre of 2.5 minutes AFRICLIM grid cells
Acacia senegal	-3.39583	12.5208	Terrible tree species distribution map - georeferenced in Google Earth by Tor-Gunnar Vagen (ICRAF)	Terrible PB. Atlas de la Haute-Volta. Arbres et arbustes. Carte de répartition et de présence de 65 espèces. 1975	Georeferenced point locations created by Roeland Kindt (ICRAF) in centre of 2.5 minutes AFRICLIM grid cells
Acacia senegal	-3.47917	12.5208	Terrible tree species distribution map - georeferenced in Google Earth by Tor-Gunnar Vagen (ICRAF)	Terrible PB. Atlas de la Haute-Volta. Arbres et arbustes. Carte de répartition et de présence de 65 espèces. 1975	Georeferenced point locations created by Roeland Kindt (ICRAF) in centre of 2.5 minutes AFRICLIM grid cells
Acacia senegal	-3.39583	12.4375	Terrible tree species distribution map - georeferenced in Google Earth by Tor-Gunnar Vagen (ICRAF)	Terrible PB. Atlas de la Haute-Volta. Arbres et arbustes. Carte de répartition et de présence de 65 espèces. 1975	Georeferenced point locations created by Roeland Kindt (ICRAF) in centre of 2.5 minutes AFRICLIM grid cells
Acacia senegal	-3.27083	12.3542	Terrible tree species distribution map - georeferenced in Google Earth by Tor-Gunnar Vagen (ICRAF)	Terrible PB. Atlas de la Haute-Volta. Arbres et arbustes. Carte de répartition et de présence de 65 espèces. 1975	Georeferenced point locations created by Roeland Kindt (ICRAF) in centre of 2.5 minutes AFRICLIM grid cells
Acacia senegal	-3.1875	12.1875	Terrible tree species distribution map - georeferenced in Google Earth by Tor-Gunnar Vagen (ICRAF)	Terrible PB. Atlas de la Haute-Volta. Arbres et arbustes. Carte de répartition et de présence de 65 espèces. 1975	Georeferenced point locations created by Roeland Kindt (ICRAF) in centre of 2.5 minutes AFRICLIM grid cells
Acacia senegal	-3.27083	12.1042	Terrible tree species distribution map - georeferenced in Google Earth by Tor-Gunnar Vagen (ICRAF)	Terrible PB. Atlas de la Haute-Volta. Arbres et arbustes. Carte de répartition et de présence de 65 espèces. 1975	Georeferenced point locations created by Roeland Kindt (ICRAF) in centre of 2.5 minutes AFRICLIM grid cells
Acacia senegal	-0.354167	12.7292	Terrible tree species distribution map - georeferenced in Google Earth by Tor-Gunnar Vagen (ICRAF)	Terrible PB. Atlas de la Haute-Volta. Arbres et arbustes. Carte de répartition et de présence de 65 espèces. 1975	Georeferenced point locations created by Roeland Kindt (ICRAF) in centre of 2.5 minutes AFRICLIM grid cells
Acacia senegal	0.9375	12.2708	Terrible tree species distribution map - georeferenced in Google Earth by Tor-Gunnar Vagen (ICRAF)	Terrible PB. Atlas de la Haute-Volta. Arbres et arbustes. Carte de répartition et de présence de 65 espèces. 1975	Georeferenced point locations created by Roeland Kindt (ICRAF) in centre of 2.5 minutes AFRICLIM grid cells
Acacia senegal	0.979167	12.3958	Terrible tree species distribution map - georeferenced in Google Earth by Tor-Gunnar Vagen (ICRAF)	Terrible PB. Atlas de la Haute-Volta. Arbres et arbustes. Carte de répartition et de présence de 65 espèces. 1975	Georeferenced point locations created by Roeland Kindt (ICRAF) in centre of 2.5 minutes AFRICLIM grid cells
Acacia senegal	-2.47917	11.9375	Terrible tree species distribution map - georeferenced in Google Earth by Tor-Gunnar Vagen (ICRAF)	Terrible PB. Atlas de la Haute-Volta. Arbres et arbustes. Carte de répartition et de présence de 65 espèces. 1975	Georeferenced point locations created by Roeland Kindt (ICRAF) in centre of 2.5 minutes AFRICLIM grid cells
Acacia senegal	-3.02083	13.3542	Terrible tree species distribution map - georeferenced in Google Earth by Tor-Gunnar Vagen (ICRAF)	Terrible PB. Atlas de la Haute-Volta. Arbres et arbustes. Carte de répartition et de présence de 65 espèces. 1975	Georeferenced point locations created by Roeland Kindt (ICRAF) in centre of 2.5 minutes AFRICLIM grid cells
Acacia senegal	0.729167	12.0625	Terrible tree species distribution map - georeferenced in Google Earth by Tor-Gunnar Vagen (ICRAF)	Terrible PB. Atlas de la Haute-Volta. Arbres et arbustes. Carte de répartition et de présence de 65 espèces. 1975	Georeferenced point locations created by Roeland Kindt (ICRAF) in centre of 2.5 minutes AFRICLIM grid cells
Adansonia digitata	-4.80112	10.0874	Observation records Jonathan Heubes 2009	Jonathan Heubes (2012) Modelling the impact of future climate and land use change on vegetation patterns, plant diversity and provisioning ecosystem services in West Africa. PhD thesis, Goethe University Frankfurt	observation record
Adansonia digitata	-4.78993	10.2002	Observation records Jonathan Heubes 2009	Jonathan Heubes (2012) Modelling the impact of future climate and land use change on vegetation patterns, plant diversity and provisioning ecosystem services in West Africa. PhD thesis, Goethe University Frankfurt	observation record
Adansonia digitata	-4.8566	10.2405	Observation records Jonathan Heubes 2009	Jonathan Heubes (2012) Modelling the impact of future climate and land use change on vegetation patterns, plant diversity and provisioning ecosystem services in West Africa. PhD thesis, Goethe University Frankfurt	observation record
Adansonia digitata	-4.85993	10.2439	Observation records Jonathan Heubes 2009	Jonathan Heubes (2012) Modelling the impact of future climate and land use change on vegetation patterns, plant diversity and provisioning ecosystem services in West Africa. PhD thesis, Goethe University Frankfurt	observation record
Adansonia digitata	-4.86088	10.2447	Observation records Jonathan Heubes 2009	Jonathan Heubes (2012) Modelling the impact of future climate and land use change on vegetation patterns, plant diversity and provisioning ecosystem services in West Africa. PhD thesis, Goethe University Frankfurt	observation record
Adansonia digitata	-4.8823	10.2609	Observation records Jonathan Heubes 2009	Jonathan Heubes (2012) Modelling the impact of future climate and land use change on vegetation patterns, plant diversity and provisioning ecosystem services in West Africa. PhD thesis, Goethe University Frankfurt	observation record
Adansonia digitata	-4.88537	10.2624	Observation records Jonathan Heubes 2009	Jonathan Heubes (2012) Modelling the impact of future climate and land use change on vegetation patterns, plant diversity and provisioning ecosystem services in West Africa. PhD thesis, Goethe University Frankfurt	observation record
Adansonia digitata	-4.88701	10.2666	Observation records Jonathan Heubes 2009	Jonathan Heubes (2012) Modelling the impact of future climate and land use change on vegetation patterns, plant diversity and provisioning ecosystem services in West Africa. PhD thesis, Goethe University Frankfurt	observation record
Adansonia digitata	-4.92687	10.2977	Observation records Jonathan Heubes 2009	Jonathan Heubes (2012) Modelling the impact of future climate and land use change on vegetation patterns, plant diversity and provisioning ecosystem services in West Africa. PhD thesis, Goethe University Frankfurt	observation record
Adansonia digitata	-4.94313	10.3189	Observation records Jonathan Heubes 2009	Jonathan Heubes (2012) Modelling the impact of future climate and land use change on vegetation patterns, plant diversity and provisioning ecosystem services in West Africa. PhD thesis, Goethe University Frankfurt	observation record
Adansonia digitata	-4.95432	10.3404	Observation records Jonathan Heubes 2009	Jonathan Heubes (2012) Modelling the impact of future climate and land use change on vegetation patterns, plant diversity and provisioning ecosystem services in West Africa. PhD thesis, Goethe University Frankfurt	observation record
Adansonia digitata	-4.82488	10.3615	Observation records Jonathan Heubes 2009	Jonathan Heubes (2012) Modelling the impact of future climate and land use change on vegetation patterns, plant diversity and provisioning ecosystem services in West Africa. PhD thesis, Goethe University Frankfurt	observation record
Adansonia digitata	-4.77394	10.5457	Observation records Jonathan Heubes 2009	Jonathan Heubes (2012) Modelling the impact of future climate and land use change on vegetation patterns, plant diversity and provisioning ecosystem services in West Africa. PhD thesis, Goethe University Frankfurt	observation record
Adansonia digitata	-5.41722	10.5828	Observation records Jonathan Heubes 2009	Jonathan Heubes (2012) Modelling the impact of future climate and land use change on vegetation patterns, plant diversity and provisioning ecosystem services in West Africa. PhD thesis, Goethe University Frankfurt	observation record
Adansonia digitata	-5.41697	10.5838	Observation records Jonathan Heubes 2009	Jonathan Heubes (2012) Modelling the impact of future climate and land use change on vegetation patterns, plant diversity and provisioning ecosystem services in West Africa. PhD thesis, Goethe University Frankfurt	observation record
Adansonia digitata	-5.42103	10.5847	Observation records Jonathan Heubes 2009	Jonathan Heubes (2012) Modelling the impact of future climate and land use change on vegetation patterns, plant diversity and provisioning ecosystem services in West Africa. PhD thesis, Goethe University Frankfurt	observation record
Adansonia digitata	-5.42054	10.5852	Observation records Jonathan Heubes 2009	Jonathan Heubes (2012) Modelling the impact of future climate and land use change on vegetation patterns, plant diversity and provisioning ecosystem services in West Africa. PhD thesis, Goethe University Frankfurt	observation record
Adansonia digitata	-5.41701	10.5853	Observation records Jonathan Heubes 2009	Jonathan Heubes (2012) Modelling the impact of future climate and land use change on vegetation patterns, plant diversity and provisioning ecosystem services in West Africa. PhD thesis, Goethe University Frankfurt	observation record
Adansonia digitata	-5.41631	10.587	Observation records Jonathan Heubes 2009	Jonathan Heubes (2012) Modelling the impact of future climate and land use change on vegetation patterns, plant diversity and provisioning ecosystem services in West Africa. PhD thesis, Goethe University Frankfurt	observation record
Adansonia digitata	-5.41685	10.5893	Observation records Jonathan Heubes 2009	Jonathan Heubes (2012) Modelling the impact of future climate and land use change on vegetation patterns, plant diversity and provisioning ecosystem services in West Africa. PhD thesis, Goethe University Frankfurt	observation record
Adansonia digitata	-5.41667	10.591	Observation records Jonathan Heubes 2009	Jonathan Heubes (2012) Modelling the impact of future climate and land use change on vegetation patterns, plant diversity and provisioning ecosystem services in West Africa. PhD thesis, Goethe University Frankfurt	observation record
Adansonia digitata	-5.41953	10.6148	Observation records Jonathan Heubes 2009	Jonathan Heubes (2012) Modelling the impact of future climate and land use change on vegetation patterns, plant diversity and provisioning ecosystem services in West Africa. PhD thesis, Goethe University Frankfurt	observation record
Adansonia digitata	-5.41875	10.6153	Observation records Jonathan Heubes 2009	Jonathan Heubes (2012) Modelling the impact of future climate and land use change on vegetation patterns, plant diversity and provisioning ecosystem services in West Africa. PhD thesis, Goethe University Frankfurt	observation record
Adansonia digitata	-5.41822	10.616	Observation records Jonathan Heubes 2009	Jonathan Heubes (2012) Modelling the impact of future climate and land use change on vegetation patterns, plant diversity and provisioning ecosystem services in West Africa. PhD thesis, Goethe University Frankfurt	observation record
Adansonia digitata	-5.41706	10.6163	Observation records Jonathan Heubes 2009	Jonathan Heubes (2012) Modelling the impact of future climate and land use change on vegetation patterns, plant diversity and provisioning ecosystem services in West Africa. PhD thesis, Goethe University Frankfurt	observation record
Adansonia digitata	-4.82342	10.6523	Observation records Jonathan Heubes 2009	Jonathan Heubes (2012) Modelling the impact of future climate and land use change on vegetation patterns, plant diversity and provisioning ecosystem services in West Africa. PhD thesis, Goethe University Frankfurt	observation record
Adansonia digitata	-4.73883	10.6579	Observation records Jonathan Heubes 2009	Jonathan Heubes (2012) Modelling the impact of future climate and land use change on vegetation patterns, plant diversity and provisioning ecosystem services in West Africa. PhD thesis, Goethe University Frankfurt	observation record
Adansonia digitata	-4.96736	10.672	Observation records Jonathan Heubes 2009	Jonathan Heubes (2012) Modelling the impact of future climate and land use change on vegetation patterns, plant diversity and provisioning ecosystem services in West Africa. PhD thesis, Goethe University Frankfurt	observation record
Adansonia digitata	-4.78816	10.6781	Observation records Jonathan Heubes 2009	Jonathan Heubes (2012) Modelling the impact of future climate and land use change on vegetation patterns, plant diversity and provisioning ecosystem services in West Africa. PhD thesis, Goethe University Frankfurt	observation record
Adansonia digitata	-4.79034	10.6793	Observation records Jonathan Heubes 2009	Jonathan Heubes (2012) Modelling the impact of future climate and land use change on vegetation patterns, plant diversity and provisioning ecosystem services in West Africa. PhD thesis, Goethe University Frankfurt	observation record
Adansonia digitata	-4.82056	10.7217	Observation records Jonathan Heubes 2009	Jonathan Heubes (2012) Modelling the impact of future climate and land use change on vegetation patterns, plant diversity and provisioning ecosystem services in West Africa. PhD thesis, Goethe University Frankfurt	observation record
Adansonia digitata	-0.98157	11.0277	Observation records Jonathan Heubes 2009	Jonathan Heubes (2012) Modelling the impact of future climate and land use change on vegetation patterns, plant diversity and provisioning ecosystem services in West Africa. PhD thesis, Goethe University Frankfurt	observation record
Adansonia digitata	-0.85956	11.0331	Observation records Jonathan Heubes 2009	Jonathan Heubes (2012) Modelling the impact of future climate and land use change on vegetation patterns, plant diversity and provisioning ecosystem services in West Africa. PhD thesis, Goethe University Frankfurt	observation record
Adansonia digitata	-0.78392	11.0431	Observation records Jonathan Heubes 2009	Jonathan Heubes (2012) Modelling the impact of future climate and land use change on vegetation patterns, plant diversity and provisioning ecosystem services in West Africa. PhD thesis, Goethe University Frankfurt	observation record
Adansonia digitata	-1.09997	11.0533	Observation records Jonathan Heubes 2009	Jonathan Heubes (2012) Modelling the impact of future climate and land use change on vegetation patterns, plant diversity and provisioning ecosystem services in West Africa. PhD thesis, Goethe University Frankfurt	observation record
Adansonia digitata	-0.86015	11.0535	Observation records Jonathan Heubes 2009	Jonathan Heubes (2012) Modelling the impact of future climate and land use change on vegetation patterns, plant diversity and provisioning ecosystem services in West Africa. PhD thesis, Goethe University Frankfurt	observation record
Adansonia digitata	-1.097	11.0579	Observation records Jonathan Heubes 2009	Jonathan Heubes (2012) Modelling the impact of future climate and land use change on vegetation patterns, plant diversity and provisioning ecosystem services in West Africa. PhD thesis, Goethe University Frankfurt	observation record
Adansonia digitata	-0.87049	11.0629	Observation records Jonathan Heubes 2009	Jonathan Heubes (2012) Modelling the impact of future climate and land use change on vegetation patterns, plant diversity and provisioning ecosystem services in West Africa. PhD thesis, Goethe University Frankfurt	observation record
Adansonia digitata	-1.08841	11.0696	Observation records Jonathan Heubes 2009	Jonathan Heubes (2012) Modelling the impact of future climate and land use change on vegetation patterns, plant diversity and provisioning ecosystem services in West Africa. PhD thesis, Goethe University Frankfurt	observation record
Adansonia digitata	-1.57947	11.1344	Observation records Jonathan Heubes 2009	Jonathan Heubes (2012) Modelling the impact of future climate and land use change on vegetation patterns, plant diversity and provisioning ecosystem services in West Africa. PhD thesis, Goethe University Frankfurt	observation record
Adansonia digitata	-0.64213	11.1762	Observation records Jonathan Heubes 2009	Jonathan Heubes (2012) Modelling the impact of future climate and land use change on vegetation patterns, plant diversity and provisioning ecosystem services in West Africa. PhD thesis, Goethe University Frankfurt	observation record
Adansonia digitata	-1.87194	11.313	Observation records Jonathan Heubes 2009	Jonathan Heubes (2012) Modelling the impact of future climate and land use change on vegetation patterns, plant diversity and provisioning ecosystem services in West Africa. PhD thesis, Goethe University Frankfurt	observation record
Adansonia digitata	-1.87525	11.314	Observation records Jonathan Heubes 2009	Jonathan Heubes (2012) Modelling the impact of future climate and land use change on vegetation patterns, plant diversity and provisioning ecosystem services in West Africa. PhD thesis, Goethe University Frankfurt	observation record
Adansonia digitata	-1.53427	11.3338	Observation records Jonathan Heubes 2009	Jonathan Heubes (2012) Modelling the impact of future climate and land use change on vegetation patterns, plant diversity and provisioning ecosystem services in West Africa. PhD thesis, Goethe University Frankfurt	observation record
Adansonia digitata	-1.65127	11.3358	Observation records Jonathan Heubes 2009	Jonathan Heubes (2012) Modelling the impact of future climate and land use change on vegetation patterns, plant diversity and provisioning ecosystem services in West Africa. PhD thesis, Goethe University Frankfurt	observation record
Adansonia digitata	-1.80994	11.3444	Observation records Jonathan Heubes 2009	Jonathan Heubes (2012) Modelling the impact of future climate and land use change on vegetation patterns, plant diversity and provisioning ecosystem services in West Africa. PhD thesis, Goethe University Frankfurt	observation record
Adansonia digitata	-1.8344	11.3956	Observation records Jonathan Heubes 2009	Jonathan Heubes (2012) Modelling the impact of future climate and land use change on vegetation patterns, plant diversity and provisioning ecosystem services in West Africa. PhD thesis, Goethe University Frankfurt	observation record
Adansonia digitata	-4.47781	11.4841	Observation records Jonathan Heubes 2009	Jonathan Heubes (2012) Modelling the impact of future climate and land use change on vegetation patterns, plant diversity and provisioning ecosystem services in West Africa. PhD thesis, Goethe University Frankfurt	observation record
Adansonia digitata	-1.20258	11.5601	Observation records Jonathan Heubes 2009	Jonathan Heubes (2012) Modelling the impact of future climate and land use change on vegetation patterns, plant diversity and provisioning ecosystem services in West Africa. PhD thesis, Goethe University Frankfurt	observation record
Adansonia digitata	-4.55237	11.5769	Observation records Jonathan Heubes 2009	Jonathan Heubes (2012) Modelling the impact of future climate and land use change on vegetation patterns, plant diversity and provisioning ecosystem services in West Africa. PhD thesis, Goethe University Frankfurt	observation record
Adansonia digitata	-4.4747	11.6933	Observation records Jonathan Heubes 2009	Jonathan Heubes (2012) Modelling the impact of future climate and land use change on vegetation patterns, plant diversity and provisioning ecosystem services in West Africa. PhD thesis, Goethe University Frankfurt	observation record
Adansonia digitata	-4.5067	11.7229	Observation records Jonathan Heubes 2009	Jonathan Heubes (2012) Modelling the impact of future climate and land use change on vegetation patterns, plant diversity and provisioning ecosystem services in West Africa. PhD thesis, Goethe University Frankfurt	observation record
Adansonia digitata	-4.51067	11.7272	Observation records Jonathan Heubes 2009	Jonathan Heubes (2012) Modelling the impact of future climate and land use change on vegetation patterns, plant diversity and provisioning ecosystem services in West Africa. PhD thesis, Goethe University Frankfurt	observation record
Adansonia digitata	-1.26203	11.8163	Observation records Jonathan Heubes 2009	Jonathan Heubes (2012) Modelling the impact of future climate and land use change on vegetation patterns, plant diversity and provisioning ecosystem services in West Africa. PhD thesis, Goethe University Frankfurt	observation record
Adansonia digitata	-0.37676	11.8731	Observation records Jonathan Heubes 2009	Jonathan Heubes (2012) Modelling the impact of future climate and land use change on vegetation patterns, plant diversity and provisioning ecosystem services in West Africa. PhD thesis, Goethe University Frankfurt	observation record
Adansonia digitata	-0.36483	12.0502	Observation records Jonathan Heubes 2009	Jonathan Heubes (2012) Modelling the impact of future climate and land use change on vegetation patterns, plant diversity and provisioning ecosystem services in West Africa. PhD thesis, Goethe University Frankfurt	observation record
Adansonia digitata	-0.36567	12.055	Observation records Jonathan Heubes 2009	Jonathan Heubes (2012) Modelling the impact of future climate and land use change on vegetation patterns, plant diversity and provisioning ecosystem services in West Africa. PhD thesis, Goethe University Frankfurt	observation record
Adansonia digitata	-3.64822	12.133	Observation records Jonathan Heubes 2009	Jonathan Heubes (2012) Modelling the impact of future climate and land use change on vegetation patterns, plant diversity and provisioning ecosystem services in West Africa. PhD thesis, Goethe University Frankfurt	observation record
Adansonia digitata	-3.63027	12.1584	Observation records Jonathan Heubes 2009	Jonathan Heubes (2012) Modelling the impact of future climate and land use change on vegetation patterns, plant diversity and provisioning ecosystem services in West Africa. PhD thesis, Goethe University Frankfurt	observation record
Adansonia digitata	-0.37502	12.1845	Observation records Jonathan Heubes 2009	Jonathan Heubes (2012) Modelling the impact of future climate and land use change on vegetation patterns, plant diversity and provisioning ecosystem services in West Africa. PhD thesis, Goethe University Frankfurt	observation record
Adansonia digitata	-0.44139	12.191	Observation records Jonathan Heubes 2009	Jonathan Heubes (2012) Modelling the impact of future climate and land use change on vegetation patterns, plant diversity and provisioning ecosystem services in West Africa. PhD thesis, Goethe University Frankfurt	observation record
Adansonia digitata	-0.47912	12.1952	Observation records Jonathan Heubes 2009	Jonathan Heubes (2012) Modelling the impact of future climate and land use change on vegetation patterns, plant diversity and provisioning ecosystem services in West Africa. PhD thesis, Goethe University Frankfurt	observation record
Adansonia digitata	-0.51415	12.2091	Observation records Jonathan Heubes 2009	Jonathan Heubes (2012) Modelling the impact of future climate and land use change on vegetation patterns, plant diversity and provisioning ecosystem services in West Africa. PhD thesis, Goethe University Frankfurt	observation record
Adansonia digitata	-0.57063	12.2325	Observation records Jonathan Heubes 2009	Jonathan Heubes (2012) Modelling the impact of future climate and land use change on vegetation patterns, plant diversity and provisioning ecosystem services in West Africa. PhD thesis, Goethe University Frankfurt	observation record
Adansonia digitata	-0.72833	12.2531	Observation records Jonathan Heubes 2009	Jonathan Heubes (2012) Modelling the impact of future climate and land use change on vegetation patterns, plant diversity and provisioning ecosystem services in West Africa. PhD thesis, Goethe University Frankfurt	observation record
Adansonia digitata	-0.98009	12.3304	Observation records Jonathan Heubes 2009	Jonathan Heubes (2012) Modelling the impact of future climate and land use change on vegetation patterns, plant diversity and provisioning ecosystem services in West Africa. PhD thesis, Goethe University Frankfurt	observation record
Adansonia digitata	-3.27364	12.5582	Observation records Jonathan Heubes 2009	Jonathan Heubes (2012) Modelling the impact of future climate and land use change on vegetation patterns, plant diversity and provisioning ecosystem services in West Africa. PhD thesis, Goethe University Frankfurt	observation record
Adansonia digitata	-3.42516	12.7502	Observation records Jonathan Heubes 2009	Jonathan Heubes (2012) Modelling the impact of future climate and land use change on vegetation patterns, plant diversity and provisioning ecosystem services in West Africa. PhD thesis, Goethe University Frankfurt	observation record
Adansonia digitata	-1.11086	13.112	Observation records Jonathan Heubes 2009	Jonathan Heubes (2012) Modelling the impact of future climate and land use change on vegetation patterns, plant diversity and provisioning ecosystem services in West Africa. PhD thesis, Goethe University Frankfurt	observation record
Adansonia digitata	-0.87388	13.148	Observation records Jonathan Heubes 2009	Jonathan Heubes (2012) Modelling the impact of future climate and land use change on vegetation patterns, plant diversity and provisioning ecosystem services in West Africa. PhD thesis, Goethe University Frankfurt	observation record
Adansonia digitata	-0.81008	13.1782	Observation records Jonathan Heubes 2009	Jonathan Heubes (2012) Modelling the impact of future climate and land use change on vegetation patterns, plant diversity and provisioning ecosystem services in West Africa. PhD thesis, Goethe University Frankfurt	observation record
Adansonia digitata	-1.121	13.1974	Observation records Jonathan Heubes 2009	Jonathan Heubes (2012) Modelling the impact of future climate and land use change on vegetation patterns, plant diversity and provisioning ecosystem services in West Africa. PhD thesis, Goethe University Frankfurt	observation record
Adansonia digitata	-0.76499	13.2194	Observation records Jonathan Heubes 2009	Jonathan Heubes (2012) Modelling the impact of future climate and land use change on vegetation patterns, plant diversity and provisioning ecosystem services in West Africa. PhD thesis, Goethe University Frankfurt	observation record
Adansonia digitata	-0.74757	13.2325	Observation records Jonathan Heubes 2009	Jonathan Heubes (2012) Modelling the impact of future climate and land use change on vegetation patterns, plant diversity and provisioning ecosystem services in West Africa. PhD thesis, Goethe University Frankfurt	observation record
Adansonia digitata	-0.71592	13.2529	Observation records Jonathan Heubes 2009	Jonathan Heubes (2012) Modelling the impact of future climate and land use change on vegetation patterns, plant diversity and provisioning ecosystem services in West Africa. PhD thesis, Goethe University Frankfurt	observation record
Adansonia digitata	-0.56761	13.3074	Observation records Jonathan Heubes 2009	Jonathan Heubes (2012) Modelling the impact of future climate and land use change on vegetation patterns, plant diversity and provisioning ecosystem services in West Africa. PhD thesis, Goethe University Frankfurt	observation record
Adansonia digitata	-0.48181	13.3602	Observation records Jonathan Heubes 2009	Jonathan Heubes (2012) Modelling the impact of future climate and land use change on vegetation patterns, plant diversity and provisioning ecosystem services in West Africa. PhD thesis, Goethe University Frankfurt	observation record
Adansonia digitata	-0.46275	13.3807	Observation records Jonathan Heubes 2009	Jonathan Heubes (2012) Modelling the impact of future climate and land use change on vegetation patterns, plant diversity and provisioning ecosystem services in West Africa. PhD thesis, Goethe University Frankfurt	observation record
Adansonia digitata	-0.44882	13.3963	Observation records Jonathan Heubes 2009	Jonathan Heubes (2012) Modelling the impact of future climate and land use change on vegetation patterns, plant diversity and provisioning ecosystem services in West Africa. PhD thesis, Goethe University Frankfurt	observation record
Adansonia digitata	-0.43388	13.4131	Observation records Jonathan Heubes 2009	Jonathan Heubes (2012) Modelling the impact of future climate and land use change on vegetation patterns, plant diversity and provisioning ecosystem services in West Africa. PhD thesis, Goethe University Frankfurt	observation record
Adansonia digitata	-1.54392	13.4302	Observation records Jonathan Heubes 2009	Jonathan Heubes (2012) Modelling the impact of future climate and land use change on vegetation patterns, plant diversity and provisioning ecosystem services in West Africa. PhD thesis, Goethe University Frankfurt	observation record
Adansonia digitata	-0.40604	13.4479	Observation records Jonathan Heubes 2009	Jonathan Heubes (2012) Modelling the impact of future climate and land use change on vegetation patterns, plant diversity and provisioning ecosystem services in West Africa. PhD thesis, Goethe University Frankfurt	observation record
Adansonia digitata	-2.45987	13.5127	Observation records Jonathan Heubes 2009	Jonathan Heubes (2012) Modelling the impact of future climate and land use change on vegetation patterns, plant diversity and provisioning ecosystem services in West Africa. PhD thesis, Goethe University Frankfurt	observation record
Adansonia digitata	-2.66285	13.6378	Observation records Jonathan Heubes 2009	Jonathan Heubes (2012) Modelling the impact of future climate and land use change on vegetation patterns, plant diversity and provisioning ecosystem services in West Africa. PhD thesis, Goethe University Frankfurt	observation record
Adansonia digitata	-2.60001	13.638	Observation records Jonathan Heubes 2009	Jonathan Heubes (2012) Modelling the impact of future climate and land use change on vegetation patterns, plant diversity and provisioning ecosystem services in West Africa. PhD thesis, Goethe University Frankfurt	observation record
Adansonia digitata	-2.2182	13.678	Observation records Jonathan Heubes 2009	Jonathan Heubes (2012) Modelling the impact of future climate and land use change on vegetation patterns, plant diversity and provisioning ecosystem services in West Africa. PhD thesis, Goethe University Frankfurt	observation record
Adansonia digitata	-2.21315	13.6789	Observation records Jonathan Heubes 2009	Jonathan Heubes (2012) Modelling the impact of future climate and land use change on vegetation patterns, plant diversity and provisioning ecosystem services in West Africa. PhD thesis, Goethe University Frankfurt	observation record
Adansonia digitata	-2.21308	13.6814	Observation records Jonathan Heubes 2009	Jonathan Heubes (2012) Modelling the impact of future climate and land use change on vegetation patterns, plant diversity and provisioning ecosystem services in West Africa. PhD thesis, Goethe University Frankfurt	observation record
Adansonia digitata	-2.21312	13.6828	Observation records Jonathan Heubes 2009	Jonathan Heubes (2012) Modelling the impact of future climate and land use change on vegetation patterns, plant diversity and provisioning ecosystem services in West Africa. PhD thesis, Goethe University Frankfurt	observation record
Adansonia digitata	-1.56093	13.7239	Observation records Jonathan Heubes 2009	Jonathan Heubes (2012) Modelling the impact of future climate and land use change on vegetation patterns, plant diversity and provisioning ecosystem services in West Africa. PhD thesis, Goethe University Frankfurt	observation record
Adansonia digitata	-2.08325	13.7634	Observation records Jonathan Heubes 2009	Jonathan Heubes (2012) Modelling the impact of future climate and land use change on vegetation patterns, plant diversity and provisioning ecosystem services in West Africa. PhD thesis, Goethe University Frankfurt	observation record
Adansonia digitata	-1.57652	13.7637	Observation records Jonathan Heubes 2009	Jonathan Heubes (2012) Modelling the impact of future climate and land use change on vegetation patterns, plant diversity and provisioning ecosystem services in West Africa. PhD thesis, Goethe University Frankfurt	observation record
Adansonia digitata	-1.58155	13.7847	Observation records Jonathan Heubes 2009	Jonathan Heubes (2012) Modelling the impact of future climate and land use change on vegetation patterns, plant diversity and provisioning ecosystem services in West Africa. PhD thesis, Goethe University Frankfurt	observation record
Adansonia digitata	-1.59795	13.8157	Observation records Jonathan Heubes 2009	Jonathan Heubes (2012) Modelling the impact of future climate and land use change on vegetation patterns, plant diversity and provisioning ecosystem services in West Africa. PhD thesis, Goethe University Frankfurt	observation record
Adansonia digitata	-1.62792	13.8666	Observation records Jonathan Heubes 2009	Jonathan Heubes (2012) Modelling the impact of future climate and land use change on vegetation patterns, plant diversity and provisioning ecosystem services in West Africa. PhD thesis, Goethe University Frankfurt	observation record
Adansonia digitata	-1.62974	13.8699	Observation records Jonathan Heubes 2009	Jonathan Heubes (2012) Modelling the impact of future climate and land use change on vegetation patterns, plant diversity and provisioning ecosystem services in West Africa. PhD thesis, Goethe University Frankfurt	observation record
Adansonia digitata	-1.9405	13.886	Observation records Jonathan Heubes 2009	Jonathan Heubes (2012) Modelling the impact of future climate and land use change on vegetation patterns, plant diversity and provisioning ecosystem services in West Africa. PhD thesis, Goethe University Frankfurt	observation record
Adansonia digitata	-1.84802	13.8948	Observation records Jonathan Heubes 2009	Jonathan Heubes (2012) Modelling the impact of future climate and land use change on vegetation patterns, plant diversity and provisioning ecosystem services in West Africa. PhD thesis, Goethe University Frankfurt	observation record
Adansonia digitata	-1.65378	13.8984	Observation records Jonathan Heubes 2009	Jonathan Heubes (2012) Modelling the impact of future climate and land use change on vegetation patterns, plant diversity and provisioning ecosystem services in West Africa. PhD thesis, Goethe University Frankfurt	observation record
Adansonia digitata	-1.67378	13.953	Observation records Jonathan Heubes 2009	Jonathan Heubes (2012) Modelling the impact of future climate and land use change on vegetation patterns, plant diversity and provisioning ecosystem services in West Africa. PhD thesis, Goethe University Frankfurt	observation record
Adansonia digitata	-1.71803	14.0991	Observation records Jonathan Heubes 2009	Jonathan Heubes (2012) Modelling the impact of future climate and land use change on vegetation patterns, plant diversity and provisioning ecosystem services in West Africa. PhD thesis, Goethe University Frankfurt	observation record
Adansonia digitata	-1.5831	14.1703	Observation records Jonathan Heubes 2009	Jonathan Heubes (2012) Modelling the impact of future climate and land use change on vegetation patterns, plant diversity and provisioning ecosystem services in West Africa. PhD thesis, Goethe University Frankfurt	observation record
Adansonia digitata	-0.983333	11.1	SeSam - Senckenbergische Sammlungsdatenbanken (Herbarium Senckenbergianum)	Brandis, D., Menner, L., Allspach, A. and Türkay, M. 2007. The collection Management System SeSam of the Senckenberg Research Institute. Zoology 110: 161-162.	collection data
Adansonia digitata	0.35	12.0667	SeSam - Senckenbergische Sammlungsdatenbanken (Herbarium Senckenbergianum)	Brandis, D., Menner, L., Allspach, A. and Türkay, M. 2007. The collection Management System SeSam of the Senckenberg Research Institute. Zoology 110: 161-162.	collection data
Adansonia digitata	1.8	12.15	SeSam - Senckenbergische Sammlungsdatenbanken (Herbarium Senckenbergianum)	Brandis, D., Menner, L., Allspach, A. and Türkay, M. 2007. The collection Management System SeSam of the Senckenberg Research Institute. Zoology 110: 161-162.	collection data
Adansonia digitata	-2.01668	12.2341	SeSam - Senckenbergische Sammlungsdatenbanken (Herbarium Senckenbergianum)	Brandis, D., Menner, L., Allspach, A. and Türkay, M. 2007. The collection Management System SeSam of the Senckenberg Research Institute. Zoology 110: 161-162.	collection data
Adansonia digitata	-0.216667	14.0833	SeSam - Senckenbergische Sammlungsdatenbanken (Herbarium Senckenbergianum)	Brandis, D., Menner, L., Allspach, A. and Türkay, M. 2007. The collection Management System SeSam of the Senckenberg Research Institute. Zoology 110: 161-162.	collection data
Adansonia digitata	-0.253417	14.4734	SeSam - Senckenbergische Sammlungsdatenbanken (Herbarium Senckenbergianum)	Brandis, D., Menner, L., Allspach, A. and Türkay, M. 2007. The collection Management System SeSam of the Senckenberg Research Institute. Zoology 110: 161-162.	collection data
Adansonia digitata	-0.174167	14.9344	SeSam - Senckenbergische Sammlungsdatenbanken (Herbarium Senckenbergianum)	Brandis, D., Menner, L., Allspach, A. and Türkay, M. 2007. The collection Management System SeSam of the Senckenberg Research Institute. Zoology 110: 161-162.	collection data
Adansonia digitata	1.33	10.18	West African Vegetation Database - records of Herbarium Senckenbergianum	Schmidt M, Janßen T, Dressler S, Hahn K, Hien M, Konaté S, Lykke AM, Mahamane A, Sambou B, Sinsin B, Thiombiano A, Wittig R, Zizka G (2012) The West African Vegetation Database. Biodiversity and Ecology 4: 105-110.	observation data
Adansonia digitata	1.35087	10.2414	West African Vegetation Database - records of Herbarium Senckenbergianum	Schmidt M, Janßen T, Dressler S, Hahn K, Hien M, Konaté S, Lykke AM, Mahamane A, Sambou B, Sinsin B, Thiombiano A, Wittig R, Zizka G (2012) The West African Vegetation Database. Biodiversity and Ecology 4: 105-110.	observation data
Adansonia digitata	1.3	10.35	West African Vegetation Database - records of Herbarium Senckenbergianum	Schmidt M, Janßen T, Dressler S, Hahn K, Hien M, Konaté S, Lykke AM, Mahamane A, Sambou B, Sinsin B, Thiombiano A, Wittig R, Zizka G (2012) The West African Vegetation Database. Biodiversity and Ecology 4: 105-110.	observation data
Adansonia digitata	1.45	10.45	West African Vegetation Database - records of Herbarium Senckenbergianum	Schmidt M, Janßen T, Dressler S, Hahn K, Hien M, Konaté S, Lykke AM, Mahamane A, Sambou B, Sinsin B, Thiombiano A, Wittig R, Zizka G (2012) The West African Vegetation Database. Biodiversity and Ecology 4: 105-110.	observation data
Adansonia digitata	1.30061	11.2072	West African Vegetation Database - records of Herbarium Senckenbergianum	Schmidt M, Janßen T, Dressler S, Hahn K, Hien M, Konaté S, Lykke AM, Mahamane A, Sambou B, Sinsin B, Thiombiano A, Wittig R, Zizka G (2012) The West African Vegetation Database. Biodiversity and Ecology 4: 105-110.	observation data
Adansonia digitata	1.12222	11.4518	West African Vegetation Database - records of Herbarium Senckenbergianum	Schmidt M, Janßen T, Dressler S, Hahn K, Hien M, Konaté S, Lykke AM, Mahamane A, Sambou B, Sinsin B, Thiombiano A, Wittig R, Zizka G (2012) The West African Vegetation Database. Biodiversity and Ecology 4: 105-110.	observation data
Adansonia digitata	2.05557	11.5398	West African Vegetation Database - records of Herbarium Senckenbergianum	Schmidt M, Janßen T, Dressler S, Hahn K, Hien M, Konaté S, Lykke AM, Mahamane A, Sambou B, Sinsin B, Thiombiano A, Wittig R, Zizka G (2012) The West African Vegetation Database. Biodiversity and Ecology 4: 105-110.	observation data
Adansonia digitata	0.52118	11.6402	West African Vegetation Database - records of Herbarium Senckenbergianum	Schmidt M, Janßen T, Dressler S, Hahn K, Hien M, Konaté S, Lykke AM, Mahamane A, Sambou B, Sinsin B, Thiombiano A, Wittig R, Zizka G (2012) The West African Vegetation Database. Biodiversity and Ecology 4: 105-110.	observation data
Adansonia digitata	2.04917	11.6402	West African Vegetation Database - records of Herbarium Senckenbergianum	Schmidt M, Janßen T, Dressler S, Hahn K, Hien M, Konaté S, Lykke AM, Mahamane A, Sambou B, Sinsin B, Thiombiano A, Wittig R, Zizka G (2012) The West African Vegetation Database. Biodiversity and Ecology 4: 105-110.	observation data
Adansonia digitata	2.43747	11.6406	West African Vegetation Database - records of Herbarium Senckenbergianum	Schmidt M, Janßen T, Dressler S, Hahn K, Hien M, Konaté S, Lykke AM, Mahamane A, Sambou B, Sinsin B, Thiombiano A, Wittig R, Zizka G (2012) The West African Vegetation Database. Biodiversity and Ecology 4: 105-110.	observation data
Adansonia digitata	2.435	11.6423	West African Vegetation Database - records of Herbarium Senckenbergianum	Schmidt M, Janßen T, Dressler S, Hahn K, Hien M, Konaté S, Lykke AM, Mahamane A, Sambou B, Sinsin B, Thiombiano A, Wittig R, Zizka G (2012) The West African Vegetation Database. Biodiversity and Ecology 4: 105-110.	observation data
Adansonia digitata	0.51932	11.6429	West African Vegetation Database - records of Herbarium Senckenbergianum	Schmidt M, Janßen T, Dressler S, Hahn K, Hien M, Konaté S, Lykke AM, Mahamane A, Sambou B, Sinsin B, Thiombiano A, Wittig R, Zizka G (2012) The West African Vegetation Database. Biodiversity and Ecology 4: 105-110.	observation data
Adansonia digitata	-0.3242	11.7012	West African Vegetation Database - records of Herbarium Senckenbergianum	Schmidt M, Janßen T, Dressler S, Hahn K, Hien M, Konaté S, Lykke AM, Mahamane A, Sambou B, Sinsin B, Thiombiano A, Wittig R, Zizka G (2012) The West African Vegetation Database. Biodiversity and Ecology 4: 105-110.	observation data
Adansonia digitata	0.218617	11.8195	West African Vegetation Database - records of Herbarium Senckenbergianum	Schmidt M, Janßen T, Dressler S, Hahn K, Hien M, Konaté S, Lykke AM, Mahamane A, Sambou B, Sinsin B, Thiombiano A, Wittig R, Zizka G (2012) The West African Vegetation Database. Biodiversity and Ecology 4: 105-110.	observation data
Adansonia digitata	0.3983	11.9367	West African Vegetation Database - records of Herbarium Senckenbergianum	Schmidt M, Janßen T, Dressler S, Hahn K, Hien M, Konaté S, Lykke AM, Mahamane A, Sambou B, Sinsin B, Thiombiano A, Wittig R, Zizka G (2012) The West African Vegetation Database. Biodiversity and Ecology 4: 105-110.	observation data
Adansonia digitata	0.98302	12.1938	West African Vegetation Database - records of Herbarium Senckenbergianum	Schmidt M, Janßen T, Dressler S, Hahn K, Hien M, Konaté S, Lykke AM, Mahamane A, Sambou B, Sinsin B, Thiombiano A, Wittig R, Zizka G (2012) The West African Vegetation Database. Biodiversity and Ecology 4: 105-110.	observation data
Adansonia digitata	-0.413056	14.3464	West African Vegetation Database - records of Herbarium Senckenbergianum	Schmidt M, Janßen T, Dressler S, Hahn K, Hien M, Konaté S, Lykke AM, Mahamane A, Sambou B, Sinsin B, Thiombiano A, Wittig R, Zizka G (2012) The West African Vegetation Database. Biodiversity and Ecology 4: 105-110.	observation data
Adansonia digitata	-0.283389	14.3719	West African Vegetation Database - records of Herbarium Senckenbergianum	Schmidt M, Janßen T, Dressler S, Hahn K, Hien M, Konaté S, Lykke AM, Mahamane A, Sambou B, Sinsin B, Thiombiano A, Wittig R, Zizka G (2012) The West African Vegetation Database. Biodiversity and Ecology 4: 105-110.	observation data
Adansonia digitata	-0.283079	14.3883	West African Vegetation Database - records of Herbarium Senckenbergianum	Schmidt M, Janßen T, Dressler S, Hahn K, Hien M, Konaté S, Lykke AM, Mahamane A, Sambou B, Sinsin B, Thiombiano A, Wittig R, Zizka G (2012) The West African Vegetation Database. Biodiversity and Ecology 4: 105-110.	observation data
Adansonia digitata	-0.0860556	14.567	West African Vegetation Database - records of Herbarium Senckenbergianum	Schmidt M, Janßen T, Dressler S, Hahn K, Hien M, Konaté S, Lykke AM, Mahamane A, Sambou B, Sinsin B, Thiombiano A, Wittig R, Zizka G (2012) The West African Vegetation Database. Biodiversity and Ecology 4: 105-110.	observation data
Adansonia digitata	-0.479722	14.8071	West African Vegetation Database - records of Herbarium Senckenbergianum	Schmidt M, Janßen T, Dressler S, Hahn K, Hien M, Konaté S, Lykke AM, Mahamane A, Sambou B, Sinsin B, Thiombiano A, Wittig R, Zizka G (2012) The West African Vegetation Database. Biodiversity and Ecology 4: 105-110.	observation data
Adansonia digitata	-0.748111	14.8607	West African Vegetation Database - records of Herbarium Senckenbergianum	Schmidt M, Janßen T, Dressler S, Hahn K, Hien M, Konaté S, Lykke AM, Mahamane A, Sambou B, Sinsin B, Thiombiano A, Wittig R, Zizka G (2012) The West African Vegetation Database. Biodiversity and Ecology 4: 105-110.	observation data
Adansonia digitata	-0.63025	14.8619	West African Vegetation Database - records of Herbarium Senckenbergianum	Schmidt M, Janßen T, Dressler S, Hahn K, Hien M, Konaté S, Lykke AM, Mahamane A, Sambou B, Sinsin B, Thiombiano A, Wittig R, Zizka G (2012) The West African Vegetation Database. Biodiversity and Ecology 4: 105-110.	observation data
Adansonia digitata	-0.630317	14.8633	West African Vegetation Database - records of Herbarium Senckenbergianum	Schmidt M, Janßen T, Dressler S, Hahn K, Hien M, Konaté S, Lykke AM, Mahamane A, Sambou B, Sinsin B, Thiombiano A, Wittig R, Zizka G (2012) The West African Vegetation Database. Biodiversity and Ecology 4: 105-110.	observation data
Adansonia digitata	-0.629722	14.8693	West African Vegetation Database - records of Herbarium Senckenbergianum	Schmidt M, Janßen T, Dressler S, Hahn K, Hien M, Konaté S, Lykke AM, Mahamane A, Sambou B, Sinsin B, Thiombiano A, Wittig R, Zizka G (2012) The West African Vegetation Database. Biodiversity and Ecology 4: 105-110.	observation data
Adansonia digitata	-0.754611	14.8718	West African Vegetation Database - records of Herbarium Senckenbergianum	Schmidt M, Janßen T, Dressler S, Hahn K, Hien M, Konaté S, Lykke AM, Mahamane A, Sambou B, Sinsin B, Thiombiano A, Wittig R, Zizka G (2012) The West African Vegetation Database. Biodiversity and Ecology 4: 105-110.	observation data
Adansonia digitata	-5.41625	10.591	West African Plants Database	Brunken U, Schmidt M, Dressler S, Janssen T, Thiombiano A, Zizka G (2008) www.westafricanplants.senckenberg.de - An image-based identification tool for West African Plants. Taxon 57 (3): 1027-1028.	georeferenced photo records
Adansonia digitata	-5.41683	10.5913	West African Plants Database	Brunken U, Schmidt M, Dressler S, Janssen T, Thiombiano A, Zizka G (2008) www.westafricanplants.senckenberg.de - An image-based identification tool for West African Plants. Taxon 57 (3): 1027-1028.	georeferenced photo records
Adansonia digitata	-5.41683	10.5913	West African Plants Database	Brunken U, Schmidt M, Dressler S, Janssen T, Thiombiano A, Zizka G (2008) www.westafricanplants.senckenberg.de - An image-based identification tool for West African Plants. Taxon 57 (3): 1027-1028.	georeferenced photo records
Adansonia digitata	-8.10113	11.0694	West African Plants Database	Brunken U, Schmidt M, Dressler S, Janssen T, Thiombiano A, Zizka G (2008) www.westafricanplants.senckenberg.de - An image-based identification tool for West African Plants. Taxon 57 (3): 1027-1028.	georeferenced photo records
Adansonia digitata	-8.10125	11.0698	West African Plants Database	Brunken U, Schmidt M, Dressler S, Janssen T, Thiombiano A, Zizka G (2008) www.westafricanplants.senckenberg.de - An image-based identification tool for West African Plants. Taxon 57 (3): 1027-1028.	georeferenced photo records
Adansonia digitata	-8.10154	11.0729	West African Plants Database	Brunken U, Schmidt M, Dressler S, Janssen T, Thiombiano A, Zizka G (2008) www.westafricanplants.senckenberg.de - An image-based identification tool for West African Plants. Taxon 57 (3): 1027-1028.	georeferenced photo records
Adansonia digitata	-8.10079	11.0732	West African Plants Database	Brunken U, Schmidt M, Dressler S, Janssen T, Thiombiano A, Zizka G (2008) www.westafricanplants.senckenberg.de - An image-based identification tool for West African Plants. Taxon 57 (3): 1027-1028.	georeferenced photo records
Adansonia digitata	-8.10045	11.0748	West African Plants Database	Brunken U, Schmidt M, Dressler S, Janssen T, Thiombiano A, Zizka G (2008) www.westafricanplants.senckenberg.de - An image-based identification tool for West African Plants. Taxon 57 (3): 1027-1028.	georeferenced photo records
Adansonia digitata	0.701701	11.7993	West African Plants Database	Brunken U, Schmidt M, Dressler S, Janssen T, Thiombiano A, Zizka G (2008) www.westafricanplants.senckenberg.de - An image-based identification tool for West African Plants. Taxon 57 (3): 1027-1028.	georeferenced photo records
Adansonia digitata	0.701129	11.7997	West African Plants Database	Brunken U, Schmidt M, Dressler S, Janssen T, Thiombiano A, Zizka G (2008) www.westafricanplants.senckenberg.de - An image-based identification tool for West African Plants. Taxon 57 (3): 1027-1028.	georeferenced photo records
Adansonia digitata	0.694866	11.8076	West African Plants Database	Brunken U, Schmidt M, Dressler S, Janssen T, Thiombiano A, Zizka G (2008) www.westafricanplants.senckenberg.de - An image-based identification tool for West African Plants. Taxon 57 (3): 1027-1028.	georeferenced photo records
Adansonia digitata	0.684056	11.8554	West African Plants Database	Brunken U, Schmidt M, Dressler S, Janssen T, Thiombiano A, Zizka G (2008) www.westafricanplants.senckenberg.de - An image-based identification tool for West African Plants. Taxon 57 (3): 1027-1028.	georeferenced photo records
Adansonia digitata	0.684065	11.8557	West African Plants Database	Brunken U, Schmidt M, Dressler S, Janssen T, Thiombiano A, Zizka G (2008) www.westafricanplants.senckenberg.de - An image-based identification tool for West African Plants. Taxon 57 (3): 1027-1028.	georeferenced photo records
Adansonia digitata	0.684063	11.8557	West African Plants Database	Brunken U, Schmidt M, Dressler S, Janssen T, Thiombiano A, Zizka G (2008) www.westafricanplants.senckenberg.de - An image-based identification tool for West African Plants. Taxon 57 (3): 1027-1028.	georeferenced photo records
Adansonia digitata	-7.28722	12.8559	West African Plants Database	Brunken U, Schmidt M, Dressler S, Janssen T, Thiombiano A, Zizka G (2008) www.westafricanplants.senckenberg.de - An image-based identification tool for West African Plants. Taxon 57 (3): 1027-1028.	georeferenced photo records
Adansonia digitata	-10.7647	13.1116	West African Plants Database	Brunken U, Schmidt M, Dressler S, Janssen T, Thiombiano A, Zizka G (2008) www.westafricanplants.senckenberg.de - An image-based identification tool for West African Plants. Taxon 57 (3): 1027-1028.	georeferenced photo records
Adansonia digitata	-6.25787	13.4463	West African Plants Database	Brunken U, Schmidt M, Dressler S, Janssen T, Thiombiano A, Zizka G (2008) www.westafricanplants.senckenberg.de - An image-based identification tool for West African Plants. Taxon 57 (3): 1027-1028.	georeferenced photo records
Adansonia digitata	-2.03463	13.8375	West African Plants Database	Brunken U, Schmidt M, Dressler S, Janssen T, Thiombiano A, Zizka G (2008) www.westafricanplants.senckenberg.de - An image-based identification tool for West African Plants. Taxon 57 (3): 1027-1028.	georeferenced photo records
Adansonia digitata	-2.0347	13.8375	West African Plants Database	Brunken U, Schmidt M, Dressler S, Janssen T, Thiombiano A, Zizka G (2008) www.westafricanplants.senckenberg.de - An image-based identification tool for West African Plants. Taxon 57 (3): 1027-1028.	georeferenced photo records
Adansonia digitata	-1.84827	13.895	West African Plants Database	Brunken U, Schmidt M, Dressler S, Janssen T, Thiombiano A, Zizka G (2008) www.westafricanplants.senckenberg.de - An image-based identification tool for West African Plants. Taxon 57 (3): 1027-1028.	georeferenced photo records
Adansonia digitata	-1.6539	13.8989	West African Plants Database	Brunken U, Schmidt M, Dressler S, Janssen T, Thiombiano A, Zizka G (2008) www.westafricanplants.senckenberg.de - An image-based identification tool for West African Plants. Taxon 57 (3): 1027-1028.	georeferenced photo records
Adansonia digitata	-3.53578	14.1921	West African Plants Database	Brunken U, Schmidt M, Dressler S, Janssen T, Thiombiano A, Zizka G (2008) www.westafricanplants.senckenberg.de - An image-based identification tool for West African Plants. Taxon 57 (3): 1027-1028.	georeferenced photo records
Adansonia digitata	-3.5333	14.2	West African Plants Database	Brunken U, Schmidt M, Dressler S, Janssen T, Thiombiano A, Zizka G (2008) www.westafricanplants.senckenberg.de - An image-based identification tool for West African Plants. Taxon 57 (3): 1027-1028.	georeferenced photo records
Adansonia digitata	-3.49725	14.2209	West African Plants Database	Brunken U, Schmidt M, Dressler S, Janssen T, Thiombiano A, Zizka G (2008) www.westafricanplants.senckenberg.de - An image-based identification tool for West African Plants. Taxon 57 (3): 1027-1028.	georeferenced photo records
Adansonia digitata	-3.52344	14.2786	West African Plants Database	Brunken U, Schmidt M, Dressler S, Janssen T, Thiombiano A, Zizka G (2008) www.westafricanplants.senckenberg.de - An image-based identification tool for West African Plants. Taxon 57 (3): 1027-1028.	georeferenced photo records
Adansonia digitata	-3.02306	14.7308	West African Plants Database	Brunken U, Schmidt M, Dressler S, Janssen T, Thiombiano A, Zizka G (2008) www.westafricanplants.senckenberg.de - An image-based identification tool for West African Plants. Taxon 57 (3): 1027-1028.	georeferenced photo records
Adansonia digitata	-0.395833	14.9792	Terrible tree species distribution map - georeferenced in Google Earth by Tor-Gunnar Vagen (ICRAF)	Terrible PB. Atlas de la Haute-Volta. Arbres et arbustes. Carte de répartition et de présence de 65 espèces. 1975	Georeferenced point locations created by Roeland Kindt (ICRAF) in centre of 2.5 minutes AFRICLIM grid cells
Adansonia digitata	-0.729167	14.8958	Terrible tree species distribution map - georeferenced in Google Earth by Tor-Gunnar Vagen (ICRAF)	Terrible PB. Atlas de la Haute-Volta. Arbres et arbustes. Carte de répartition et de présence de 65 espèces. 1975	Georeferenced point locations created by Roeland Kindt (ICRAF) in centre of 2.5 minutes AFRICLIM grid cells
Adansonia digitata	-0.0208333	14.9792	Terrible tree species distribution map - georeferenced in Google Earth by Tor-Gunnar Vagen (ICRAF)	Terrible PB. Atlas de la Haute-Volta. Arbres et arbustes. Carte de répartition et de présence de 65 espèces. 1975	Georeferenced point locations created by Roeland Kindt (ICRAF) in centre of 2.5 minutes AFRICLIM grid cells
Adansonia digitata	0.0208333	14.8958	Terrible tree species distribution map - georeferenced in Google Earth by Tor-Gunnar Vagen (ICRAF)	Terrible PB. Atlas de la Haute-Volta. Arbres et arbustes. Carte de répartition et de présence de 65 espèces. 1975	Georeferenced point locations created by Roeland Kindt (ICRAF) in centre of 2.5 minutes AFRICLIM grid cells
Adansonia digitata	0.0208333	14.8125	Terrible tree species distribution map - georeferenced in Google Earth by Tor-Gunnar Vagen (ICRAF)	Terrible PB. Atlas de la Haute-Volta. Arbres et arbustes. Carte de répartition et de présence de 65 espèces. 1975	Georeferenced point locations created by Roeland Kindt (ICRAF) in centre of 2.5 minutes AFRICLIM grid cells
Adansonia digitata	-0.0208333	14.6042	Terrible tree species distribution map - georeferenced in Google Earth by Tor-Gunnar Vagen (ICRAF)	Terrible PB. Atlas de la Haute-Volta. Arbres et arbustes. Carte de répartition et de présence de 65 espèces. 1975	Georeferenced point locations created by Roeland Kindt (ICRAF) in centre of 2.5 minutes AFRICLIM grid cells
Adansonia digitata	-0.6875	14.5625	Terrible tree species distribution map - georeferenced in Google Earth by Tor-Gunnar Vagen (ICRAF)	Terrible PB. Atlas de la Haute-Volta. Arbres et arbustes. Carte de répartition et de présence de 65 espèces. 1975	Georeferenced point locations created by Roeland Kindt (ICRAF) in centre of 2.5 minutes AFRICLIM grid cells
Adansonia digitata	-0.604167	14.5208	Terrible tree species distribution map - georeferenced in Google Earth by Tor-Gunnar Vagen (ICRAF)	Terrible PB. Atlas de la Haute-Volta. Arbres et arbustes. Carte de répartition et de présence de 65 espèces. 1975	Georeferenced point locations created by Roeland Kindt (ICRAF) in centre of 2.5 minutes AFRICLIM grid cells
Adansonia digitata	-0.0208333	14.5625	Terrible tree species distribution map - georeferenced in Google Earth by Tor-Gunnar Vagen (ICRAF)	Terrible PB. Atlas de la Haute-Volta. Arbres et arbustes. Carte de répartition et de présence de 65 espèces. 1975	Georeferenced point locations created by Roeland Kindt (ICRAF) in centre of 2.5 minutes AFRICLIM grid cells
Adansonia digitata	-0.104167	14.0208	Terrible tree species distribution map - georeferenced in Google Earth by Tor-Gunnar Vagen (ICRAF)	Terrible PB. Atlas de la Haute-Volta. Arbres et arbustes. Carte de répartition et de présence de 65 espèces. 1975	Georeferenced point locations created by Roeland Kindt (ICRAF) in centre of 2.5 minutes AFRICLIM grid cells
Adansonia digitata	-0.0625	13.9375	Terrible tree species distribution map - georeferenced in Google Earth by Tor-Gunnar Vagen (ICRAF)	Terrible PB. Atlas de la Haute-Volta. Arbres et arbustes. Carte de répartition et de présence de 65 espèces. 1975	Georeferenced point locations created by Roeland Kindt (ICRAF) in centre of 2.5 minutes AFRICLIM grid cells
Adansonia digitata	-0.1875	13.8958	Terrible tree species distribution map - georeferenced in Google Earth by Tor-Gunnar Vagen (ICRAF)	Terrible PB. Atlas de la Haute-Volta. Arbres et arbustes. Carte de répartition et de présence de 65 espèces. 1975	Georeferenced point locations created by Roeland Kindt (ICRAF) in centre of 2.5 minutes AFRICLIM grid cells
Adansonia digitata	0.104167	13.8958	Terrible tree species distribution map - georeferenced in Google Earth by Tor-Gunnar Vagen (ICRAF)	Terrible PB. Atlas de la Haute-Volta. Arbres et arbustes. Carte de répartition et de présence de 65 espèces. 1975	Georeferenced point locations created by Roeland Kindt (ICRAF) in centre of 2.5 minutes AFRICLIM grid cells
Adansonia digitata	0.1875	13.8125	Terrible tree species distribution map - georeferenced in Google Earth by Tor-Gunnar Vagen (ICRAF)	Terrible PB. Atlas de la Haute-Volta. Arbres et arbustes. Carte de répartition et de présence de 65 espèces. 1975	Georeferenced point locations created by Roeland Kindt (ICRAF) in centre of 2.5 minutes AFRICLIM grid cells
Adansonia digitata	0.0625	14.1875	Terrible tree species distribution map - georeferenced in Google Earth by Tor-Gunnar Vagen (ICRAF)	Terrible PB. Atlas de la Haute-Volta. Arbres et arbustes. Carte de répartition et de présence de 65 espèces. 1975	Georeferenced point locations created by Roeland Kindt (ICRAF) in centre of 2.5 minutes AFRICLIM grid cells
Adansonia digitata	0.3125	13.6875	Terrible tree species distribution map - georeferenced in Google Earth by Tor-Gunnar Vagen (ICRAF)	Terrible PB. Atlas de la Haute-Volta. Arbres et arbustes. Carte de répartition et de présence de 65 espèces. 1975	Georeferenced point locations created by Roeland Kindt (ICRAF) in centre of 2.5 minutes AFRICLIM grid cells
Adansonia digitata	0.479167	13.4792	Terrible tree species distribution map - georeferenced in Google Earth by Tor-Gunnar Vagen (ICRAF)	Terrible PB. Atlas de la Haute-Volta. Arbres et arbustes. Carte de répartition et de présence de 65 espèces. 1975	Georeferenced point locations created by Roeland Kindt (ICRAF) in centre of 2.5 minutes AFRICLIM grid cells
Adansonia digitata	0.520833	13.4375	Terrible tree species distribution map - georeferenced in Google Earth by Tor-Gunnar Vagen (ICRAF)	Terrible PB. Atlas de la Haute-Volta. Arbres et arbustes. Carte de répartition et de présence de 65 espèces. 1975	Georeferenced point locations created by Roeland Kindt (ICRAF) in centre of 2.5 minutes AFRICLIM grid cells
Adansonia digitata	-0.145833	13.3958	Terrible tree species distribution map - georeferenced in Google Earth by Tor-Gunnar Vagen (ICRAF)	Terrible PB. Atlas de la Haute-Volta. Arbres et arbustes. Carte de répartition et de présence de 65 espèces. 1975	Georeferenced point locations created by Roeland Kindt (ICRAF) in centre of 2.5 minutes AFRICLIM grid cells
Adansonia digitata	-0.145833	12.7708	Terrible tree species distribution map - georeferenced in Google Earth by Tor-Gunnar Vagen (ICRAF)	Terrible PB. Atlas de la Haute-Volta. Arbres et arbustes. Carte de répartition et de présence de 65 espèces. 1975	Georeferenced point locations created by Roeland Kindt (ICRAF) in centre of 2.5 minutes AFRICLIM grid cells
Adansonia digitata	-0.270833	12.7292	Terrible tree species distribution map - georeferenced in Google Earth by Tor-Gunnar Vagen (ICRAF)	Terrible PB. Atlas de la Haute-Volta. Arbres et arbustes. Carte de répartition et de présence de 65 espèces. 1975	Georeferenced point locations created by Roeland Kindt (ICRAF) in centre of 2.5 minutes AFRICLIM grid cells
Adansonia digitata	1.60417	12.4792	Terrible tree species distribution map - georeferenced in Google Earth by Tor-Gunnar Vagen (ICRAF)	Terrible PB. Atlas de la Haute-Volta. Arbres et arbustes. Carte de répartition et de présence de 65 espèces. 1975	Georeferenced point locations created by Roeland Kindt (ICRAF) in centre of 2.5 minutes AFRICLIM grid cells
Adansonia digitata	1.5625	12.3958	Terrible tree species distribution map - georeferenced in Google Earth by Tor-Gunnar Vagen (ICRAF)	Terrible PB. Atlas de la Haute-Volta. Arbres et arbustes. Carte de répartition et de présence de 65 espèces. 1975	Georeferenced point locations created by Roeland Kindt (ICRAF) in centre of 2.5 minutes AFRICLIM grid cells
Adansonia digitata	1.60417	12.3958	Terrible tree species distribution map - georeferenced in Google Earth by Tor-Gunnar Vagen (ICRAF)	Terrible PB. Atlas de la Haute-Volta. Arbres et arbustes. Carte de répartition et de présence de 65 espèces. 1975	Georeferenced point locations created by Roeland Kindt (ICRAF) in centre of 2.5 minutes AFRICLIM grid cells
Adansonia digitata	2.02083	12.0625	Terrible tree species distribution map - georeferenced in Google Earth by Tor-Gunnar Vagen (ICRAF)	Terrible PB. Atlas de la Haute-Volta. Arbres et arbustes. Carte de répartition et de présence de 65 espèces. 1975	Georeferenced point locations created by Roeland Kindt (ICRAF) in centre of 2.5 minutes AFRICLIM grid cells
Adansonia digitata	2.02083	11.9792	Terrible tree species distribution map - georeferenced in Google Earth by Tor-Gunnar Vagen (ICRAF)	Terrible PB. Atlas de la Haute-Volta. Arbres et arbustes. Carte de répartition et de présence de 65 espèces. 1975	Georeferenced point locations created by Roeland Kindt (ICRAF) in centre of 2.5 minutes AFRICLIM grid cells
Adansonia digitata	0.270833	13.6875	Terrible tree species distribution map - georeferenced in Google Earth by Tor-Gunnar Vagen (ICRAF)	Terrible PB. Atlas de la Haute-Volta. Arbres et arbustes. Carte de répartition et de présence de 65 espèces. 1975	Georeferenced point locations created by Roeland Kindt (ICRAF) in centre of 2.5 minutes AFRICLIM grid cells
Adansonia digitata	2.02083	11.8125	Terrible tree species distribution map - georeferenced in Google Earth by Tor-Gunnar Vagen (ICRAF)	Terrible PB. Atlas de la Haute-Volta. Arbres et arbustes. Carte de répartition et de présence de 65 espèces. 1975	Georeferenced point locations created by Roeland Kindt (ICRAF) in centre of 2.5 minutes AFRICLIM grid cells
Adansonia digitata	2.02083	11.7708	Terrible tree species distribution map - georeferenced in Google Earth by Tor-Gunnar Vagen (ICRAF)	Terrible PB. Atlas de la Haute-Volta. Arbres et arbustes. Carte de répartition et de présence de 65 espèces. 1975	Georeferenced point locations created by Roeland Kindt (ICRAF) in centre of 2.5 minutes AFRICLIM grid cells
Adansonia digitata	2.02083	11.6875	Terrible tree species distribution map - georeferenced in Google Earth by Tor-Gunnar Vagen (ICRAF)	Terrible PB. Atlas de la Haute-Volta. Arbres et arbustes. Carte de répartition et de présence de 65 espèces. 1975	Georeferenced point locations created by Roeland Kindt (ICRAF) in centre of 2.5 minutes AFRICLIM grid cells
Adansonia digitata	1.8125	11.4375	Terrible tree species distribution map - georeferenced in Google Earth by Tor-Gunnar Vagen (ICRAF)	Terrible PB. Atlas de la Haute-Volta. Arbres et arbustes. Carte de répartition et de présence de 65 espèces. 1975	Georeferenced point locations created by Roeland Kindt (ICRAF) in centre of 2.5 minutes AFRICLIM grid cells
Adansonia digitata	1.64583	11.4375	Terrible tree species distribution map - georeferenced in Google Earth by Tor-Gunnar Vagen (ICRAF)	Terrible PB. Atlas de la Haute-Volta. Arbres et arbustes. Carte de répartition et de présence de 65 espèces. 1975	Georeferenced point locations created by Roeland Kindt (ICRAF) in centre of 2.5 minutes AFRICLIM grid cells
Adansonia digitata	1.60417	11.3958	Terrible tree species distribution map - georeferenced in Google Earth by Tor-Gunnar Vagen (ICRAF)	Terrible PB. Atlas de la Haute-Volta. Arbres et arbustes. Carte de répartition et de présence de 65 espèces. 1975	Georeferenced point locations created by Roeland Kindt (ICRAF) in centre of 2.5 minutes AFRICLIM grid cells
Adansonia digitata	-0.0625	11.6042	Terrible tree species distribution map - georeferenced in Google Earth by Tor-Gunnar Vagen (ICRAF)	Terrible PB. Atlas de la Haute-Volta. Arbres et arbustes. Carte de répartition et de présence de 65 espèces. 1975	Georeferenced point locations created by Roeland Kindt (ICRAF) in centre of 2.5 minutes AFRICLIM grid cells
Adansonia digitata	0.645833	11.2292	Terrible tree species distribution map - georeferenced in Google Earth by Tor-Gunnar Vagen (ICRAF)	Terrible PB. Atlas de la Haute-Volta. Arbres et arbustes. Carte de répartition et de présence de 65 espèces. 1975	Georeferenced point locations created by Roeland Kindt (ICRAF) in centre of 2.5 minutes AFRICLIM grid cells
Adansonia digitata	0.104167	11.6042	Terrible tree species distribution map - georeferenced in Google Earth by Tor-Gunnar Vagen (ICRAF)	Terrible PB. Atlas de la Haute-Volta. Arbres et arbustes. Carte de répartition et de présence de 65 espèces. 1975	Georeferenced point locations created by Roeland Kindt (ICRAF) in centre of 2.5 minutes AFRICLIM grid cells
Adansonia digitata	0.5625	12.0208	Terrible tree species distribution map - georeferenced in Google Earth by Tor-Gunnar Vagen (ICRAF)	Terrible PB. Atlas de la Haute-Volta. Arbres et arbustes. Carte de répartition et de présence de 65 espèces. 1975	Georeferenced point locations created by Roeland Kindt (ICRAF) in centre of 2.5 minutes AFRICLIM grid cells
Adansonia digitata	-0.0625	14.0208	Terrible tree species distribution map - georeferenced in Google Earth by Tor-Gunnar Vagen (ICRAF)	Terrible PB. Atlas de la Haute-Volta. Arbres et arbustes. Carte de répartition et de présence de 65 espèces. 1975	Georeferenced point locations created by Roeland Kindt (ICRAF) in centre of 2.5 minutes AFRICLIM grid cells
Adansonia digitata	2.3125	11.6875	Terrible tree species distribution map - georeferenced in Google Earth by Tor-Gunnar Vagen (ICRAF)	Terrible PB. Atlas de la Haute-Volta. Arbres et arbustes. Carte de répartition et de présence de 65 espèces. 1975	Georeferenced point locations created by Roeland Kindt (ICRAF) in centre of 2.5 minutes AFRICLIM grid cells
Adansonia digitata	1.4375	11.5208	Terrible tree species distribution map - georeferenced in Google Earth by Tor-Gunnar Vagen (ICRAF)	Terrible PB. Atlas de la Haute-Volta. Arbres et arbustes. Carte de répartition et de présence de 65 espèces. 1975	Georeferenced point locations created by Roeland Kindt (ICRAF) in centre of 2.5 minutes AFRICLIM grid cells
Adansonia digitata	1.4375	11.5625	Terrible tree species distribution map - georeferenced in Google Earth by Tor-Gunnar Vagen (ICRAF)	Terrible PB. Atlas de la Haute-Volta. Arbres et arbustes. Carte de répartition et de présence de 65 espèces. 1975	Georeferenced point locations created by Roeland Kindt (ICRAF) in centre of 2.5 minutes AFRICLIM grid cells
Adansonia digitata	-1.02083	14.1458	Terrible tree species distribution map - georeferenced in Google Earth by Tor-Gunnar Vagen (ICRAF)	Terrible PB. Atlas de la Haute-Volta. Arbres et arbustes. Carte de répartition et de présence de 65 espèces. 1975	Georeferenced point locations created by Roeland Kindt (ICRAF) in centre of 2.5 minutes AFRICLIM grid cells
Adansonia digitata	-0.4375	12.1875	Terrible tree species distribution map - georeferenced in Google Earth by Tor-Gunnar Vagen (ICRAF)	Terrible PB. Atlas de la Haute-Volta. Arbres et arbustes. Carte de répartition et de présence de 65 espèces. 1975	Georeferenced point locations created by Roeland Kindt (ICRAF) in centre of 2.5 minutes AFRICLIM grid cells
Adansonia digitata	-0.395833	12.1042	Terrible tree species distribution map - georeferenced in Google Earth by Tor-Gunnar Vagen (ICRAF)	Terrible PB. Atlas de la Haute-Volta. Arbres et arbustes. Carte de répartition et de présence de 65 espèces. 1975	Georeferenced point locations created by Roeland Kindt (ICRAF) in centre of 2.5 minutes AFRICLIM grid cells
Adansonia digitata	-0.479167	11.8125	Terrible tree species distribution map - georeferenced in Google Earth by Tor-Gunnar Vagen (ICRAF)	Terrible PB. Atlas de la Haute-Volta. Arbres et arbustes. Carte de répartition et de présence de 65 espèces. 1975	Georeferenced point locations created by Roeland Kindt (ICRAF) in centre of 2.5 minutes AFRICLIM grid cells
Adansonia digitata	-0.645833	11.7708	Terrible tree species distribution map - georeferenced in Google Earth by Tor-Gunnar Vagen (ICRAF)	Terrible PB. Atlas de la Haute-Volta. Arbres et arbustes. Carte de répartition et de présence de 65 espèces. 1975	Georeferenced point locations created by Roeland Kindt (ICRAF) in centre of 2.5 minutes AFRICLIM grid cells
Adansonia digitata	-0.729167	11.7708	Terrible tree species distribution map - georeferenced in Google Earth by Tor-Gunnar Vagen (ICRAF)	Terrible PB. Atlas de la Haute-Volta. Arbres et arbustes. Carte de répartition et de présence de 65 espèces. 1975	Georeferenced point locations created by Roeland Kindt (ICRAF) in centre of 2.5 minutes AFRICLIM grid cells
Adansonia digitata	-0.354167	11.7292	Terrible tree species distribution map - georeferenced in Google Earth by Tor-Gunnar Vagen (ICRAF)	Terrible PB. Atlas de la Haute-Volta. Arbres et arbustes. Carte de répartition et de présence de 65 espèces. 1975	Georeferenced point locations created by Roeland Kindt (ICRAF) in centre of 2.5 minutes AFRICLIM grid cells
Adansonia digitata	-1.10417	11.1042	Terrible tree species distribution map - georeferenced in Google Earth by Tor-Gunnar Vagen (ICRAF)	Terrible PB. Atlas de la Haute-Volta. Arbres et arbustes. Carte de répartition et de présence de 65 espèces. 1975	Georeferenced point locations created by Roeland Kindt (ICRAF) in centre of 2.5 minutes AFRICLIM grid cells
Adansonia digitata	-0.979167	11.1875	Terrible tree species distribution map - georeferenced in Google Earth by Tor-Gunnar Vagen (ICRAF)	Terrible PB. Atlas de la Haute-Volta. Arbres et arbustes. Carte de répartition et de présence de 65 espèces. 1975	Georeferenced point locations created by Roeland Kindt (ICRAF) in centre of 2.5 minutes AFRICLIM grid cells
Adansonia digitata	-0.979167	11.1458	Terrible tree species distribution map - georeferenced in Google Earth by Tor-Gunnar Vagen (ICRAF)	Terrible PB. Atlas de la Haute-Volta. Arbres et arbustes. Carte de répartition et de présence de 65 espèces. 1975	Georeferenced point locations created by Roeland Kindt (ICRAF) in centre of 2.5 minutes AFRICLIM grid cells
Adansonia digitata	-1.9375	14.1875	Terrible tree species distribution map - georeferenced in Google Earth by Tor-Gunnar Vagen (ICRAF)	Terrible PB. Atlas de la Haute-Volta. Arbres et arbustes. Carte de répartition et de présence de 65 espèces. 1975	Georeferenced point locations created by Roeland Kindt (ICRAF) in centre of 2.5 minutes AFRICLIM grid cells
Adansonia digitata	-1.77083	14.1458	Terrible tree species distribution map - georeferenced in Google Earth by Tor-Gunnar Vagen (ICRAF)	Terrible PB. Atlas de la Haute-Volta. Arbres et arbustes. Carte de répartition et de présence de 65 espèces. 1975	Georeferenced point locations created by Roeland Kindt (ICRAF) in centre of 2.5 minutes AFRICLIM grid cells
Adansonia digitata	-1.64583	14.0625	Terrible tree species distribution map - georeferenced in Google Earth by Tor-Gunnar Vagen (ICRAF)	Terrible PB. Atlas de la Haute-Volta. Arbres et arbustes. Carte de répartition et de présence de 65 espèces. 1975	Georeferenced point locations created by Roeland Kindt (ICRAF) in centre of 2.5 minutes AFRICLIM grid cells
Adansonia digitata	-1.60417	13.9792	Terrible tree species distribution map - georeferenced in Google Earth by Tor-Gunnar Vagen (ICRAF)	Terrible PB. Atlas de la Haute-Volta. Arbres et arbustes. Carte de répartition et de présence de 65 espèces. 1975	Georeferenced point locations created by Roeland Kindt (ICRAF) in centre of 2.5 minutes AFRICLIM grid cells
Adansonia digitata	-1.64583	13.9792	Terrible tree species distribution map - georeferenced in Google Earth by Tor-Gunnar Vagen (ICRAF)	Terrible PB. Atlas de la Haute-Volta. Arbres et arbustes. Carte de répartition et de présence de 65 espèces. 1975	Georeferenced point locations created by Roeland Kindt (ICRAF) in centre of 2.5 minutes AFRICLIM grid cells
Adansonia digitata	-1.5625	13.7292	Terrible tree species distribution map - georeferenced in Google Earth by Tor-Gunnar Vagen (ICRAF)	Terrible PB. Atlas de la Haute-Volta. Arbres et arbustes. Carte de répartition et de présence de 65 espèces. 1975	Georeferenced point locations created by Roeland Kindt (ICRAF) in centre of 2.5 minutes AFRICLIM grid cells
Adansonia digitata	-0.354167	13.4792	Terrible tree species distribution map - georeferenced in Google Earth by Tor-Gunnar Vagen (ICRAF)	Terrible PB. Atlas de la Haute-Volta. Arbres et arbustes. Carte de répartition et de présence de 65 espèces. 1975	Georeferenced point locations created by Roeland Kindt (ICRAF) in centre of 2.5 minutes AFRICLIM grid cells
Adansonia digitata	-0.979167	13.4375	Terrible tree species distribution map - georeferenced in Google Earth by Tor-Gunnar Vagen (ICRAF)	Terrible PB. Atlas de la Haute-Volta. Arbres et arbustes. Carte de répartition et de présence de 65 espèces. 1975	Georeferenced point locations created by Roeland Kindt (ICRAF) in centre of 2.5 minutes AFRICLIM grid cells
Adansonia digitata	-1.0625	13.3542	Terrible tree species distribution map - georeferenced in Google Earth by Tor-Gunnar Vagen (ICRAF)	Terrible PB. Atlas de la Haute-Volta. Arbres et arbustes. Carte de répartition et de présence de 65 espèces. 1975	Georeferenced point locations created by Roeland Kindt (ICRAF) in centre of 2.5 minutes AFRICLIM grid cells
Adansonia digitata	-1.10417	13.2708	Terrible tree species distribution map - georeferenced in Google Earth by Tor-Gunnar Vagen (ICRAF)	Terrible PB. Atlas de la Haute-Volta. Arbres et arbustes. Carte de répartition et de présence de 65 espèces. 1975	Georeferenced point locations created by Roeland Kindt (ICRAF) in centre of 2.5 minutes AFRICLIM grid cells
Adansonia digitata	-1.0625	13.2292	Terrible tree species distribution map - georeferenced in Google Earth by Tor-Gunnar Vagen (ICRAF)	Terrible PB. Atlas de la Haute-Volta. Arbres et arbustes. Carte de répartition et de présence de 65 espèces. 1975	Georeferenced point locations created by Roeland Kindt (ICRAF) in centre of 2.5 minutes AFRICLIM grid cells
Adansonia digitata	-0.770833	13.2292	Terrible tree species distribution map - georeferenced in Google Earth by Tor-Gunnar Vagen (ICRAF)	Terrible PB. Atlas de la Haute-Volta. Arbres et arbustes. Carte de répartition et de présence de 65 espèces. 1975	Georeferenced point locations created by Roeland Kindt (ICRAF) in centre of 2.5 minutes AFRICLIM grid cells
Adansonia digitata	-1.0625	13.1458	Terrible tree species distribution map - georeferenced in Google Earth by Tor-Gunnar Vagen (ICRAF)	Terrible PB. Atlas de la Haute-Volta. Arbres et arbustes. Carte de répartition et de présence de 65 espèces. 1975	Georeferenced point locations created by Roeland Kindt (ICRAF) in centre of 2.5 minutes AFRICLIM grid cells
Adansonia digitata	1.3125	12.4375	Terrible tree species distribution map - georeferenced in Google Earth by Tor-Gunnar Vagen (ICRAF)	Terrible PB. Atlas de la Haute-Volta. Arbres et arbustes. Carte de répartition et de présence de 65 espèces. 1975	Georeferenced point locations created by Roeland Kindt (ICRAF) in centre of 2.5 minutes AFRICLIM grid cells
Adansonia digitata	1.3125	12.3958	Terrible tree species distribution map - georeferenced in Google Earth by Tor-Gunnar Vagen (ICRAF)	Terrible PB. Atlas de la Haute-Volta. Arbres et arbustes. Carte de répartition et de présence de 65 espèces. 1975	Georeferenced point locations created by Roeland Kindt (ICRAF) in centre of 2.5 minutes AFRICLIM grid cells
Adansonia digitata	1.0625	12.3958	Terrible tree species distribution map - georeferenced in Google Earth by Tor-Gunnar Vagen (ICRAF)	Terrible PB. Atlas de la Haute-Volta. Arbres et arbustes. Carte de répartition et de présence de 65 espèces. 1975	Georeferenced point locations created by Roeland Kindt (ICRAF) in centre of 2.5 minutes AFRICLIM grid cells
Adansonia digitata	1.6875	11.7708	Terrible tree species distribution map - georeferenced in Google Earth by Tor-Gunnar Vagen (ICRAF)	Terrible PB. Atlas de la Haute-Volta. Arbres et arbustes. Carte de répartition et de présence de 65 espèces. 1975	Georeferenced point locations created by Roeland Kindt (ICRAF) in centre of 2.5 minutes AFRICLIM grid cells
Adansonia digitata	0.4375	11.8125	Terrible tree species distribution map - georeferenced in Google Earth by Tor-Gunnar Vagen (ICRAF)	Terrible PB. Atlas de la Haute-Volta. Arbres et arbustes. Carte de répartition et de présence de 65 espèces. 1975	Georeferenced point locations created by Roeland Kindt (ICRAF) in centre of 2.5 minutes AFRICLIM grid cells
Adansonia digitata	-0.1875	12.0625	Terrible tree species distribution map - georeferenced in Google Earth by Tor-Gunnar Vagen (ICRAF)	Terrible PB. Atlas de la Haute-Volta. Arbres et arbustes. Carte de répartition et de présence de 65 espèces. 1975	Georeferenced point locations created by Roeland Kindt (ICRAF) in centre of 2.5 minutes AFRICLIM grid cells
Adansonia digitata	-0.145833	12.0208	Terrible tree species distribution map - georeferenced in Google Earth by Tor-Gunnar Vagen (ICRAF)	Terrible PB. Atlas de la Haute-Volta. Arbres et arbustes. Carte de répartition et de présence de 65 espèces. 1975	Georeferenced point locations created by Roeland Kindt (ICRAF) in centre of 2.5 minutes AFRICLIM grid cells
Adansonia digitata	-1.1875	11.7708	Terrible tree species distribution map - georeferenced in Google Earth by Tor-Gunnar Vagen (ICRAF)	Terrible PB. Atlas de la Haute-Volta. Arbres et arbustes. Carte de répartition et de présence de 65 espèces. 1975	Georeferenced point locations created by Roeland Kindt (ICRAF) in centre of 2.5 minutes AFRICLIM grid cells
Adansonia digitata	-1.5625	12.1042	Terrible tree species distribution map - georeferenced in Google Earth by Tor-Gunnar Vagen (ICRAF)	Terrible PB. Atlas de la Haute-Volta. Arbres et arbustes. Carte de répartition et de présence de 65 espèces. 1975	Georeferenced point locations created by Roeland Kindt (ICRAF) in centre of 2.5 minutes AFRICLIM grid cells
Adansonia digitata	-1.4375	12.1875	Terrible tree species distribution map - georeferenced in Google Earth by Tor-Gunnar Vagen (ICRAF)	Terrible PB. Atlas de la Haute-Volta. Arbres et arbustes. Carte de répartition et de présence de 65 espèces. 1975	Georeferenced point locations created by Roeland Kindt (ICRAF) in centre of 2.5 minutes AFRICLIM grid cells
Adansonia digitata	-0.979167	12.3542	Terrible tree species distribution map - georeferenced in Google Earth by Tor-Gunnar Vagen (ICRAF)	Terrible PB. Atlas de la Haute-Volta. Arbres et arbustes. Carte de répartition et de présence de 65 espèces. 1975	Georeferenced point locations created by Roeland Kindt (ICRAF) in centre of 2.5 minutes AFRICLIM grid cells
Adansonia digitata	-1.10417	12.3542	Terrible tree species distribution map - georeferenced in Google Earth by Tor-Gunnar Vagen (ICRAF)	Terrible PB. Atlas de la Haute-Volta. Arbres et arbustes. Carte de répartition et de présence de 65 espèces. 1975	Georeferenced point locations created by Roeland Kindt (ICRAF) in centre of 2.5 minutes AFRICLIM grid cells
Adansonia digitata	-1.47917	12.3125	Terrible tree species distribution map - georeferenced in Google Earth by Tor-Gunnar Vagen (ICRAF)	Terrible PB. Atlas de la Haute-Volta. Arbres et arbustes. Carte de répartition et de présence de 65 espèces. 1975	Georeferenced point locations created by Roeland Kindt (ICRAF) in centre of 2.5 minutes AFRICLIM grid cells
Adansonia digitata	-1.89583	11.3125	Terrible tree species distribution map - georeferenced in Google Earth by Tor-Gunnar Vagen (ICRAF)	Terrible PB. Atlas de la Haute-Volta. Arbres et arbustes. Carte de répartition et de présence de 65 espèces. 1975	Georeferenced point locations created by Roeland Kindt (ICRAF) in centre of 2.5 minutes AFRICLIM grid cells
Adansonia digitata	-1.5625	12.1875	Terrible tree species distribution map - georeferenced in Google Earth by Tor-Gunnar Vagen (ICRAF)	Terrible PB. Atlas de la Haute-Volta. Arbres et arbustes. Carte de répartition et de présence de 65 espèces. 1975	Georeferenced point locations created by Roeland Kindt (ICRAF) in centre of 2.5 minutes AFRICLIM grid cells
Adansonia digitata	-1.47917	12.9375	Terrible tree species distribution map - georeferenced in Google Earth by Tor-Gunnar Vagen (ICRAF)	Terrible PB. Atlas de la Haute-Volta. Arbres et arbustes. Carte de répartition et de présence de 65 espèces. 1975	Georeferenced point locations created by Roeland Kindt (ICRAF) in centre of 2.5 minutes AFRICLIM grid cells
Adansonia digitata	-2.0625	13.4792	Terrible tree species distribution map - georeferenced in Google Earth by Tor-Gunnar Vagen (ICRAF)	Terrible PB. Atlas de la Haute-Volta. Arbres et arbustes. Carte de répartition et de présence de 65 espèces. 1975	Georeferenced point locations created by Roeland Kindt (ICRAF) in centre of 2.5 minutes AFRICLIM grid cells
Adansonia digitata	-1.89583	13.8958	Terrible tree species distribution map - georeferenced in Google Earth by Tor-Gunnar Vagen (ICRAF)	Terrible PB. Atlas de la Haute-Volta. Arbres et arbustes. Carte de répartition et de présence de 65 espèces. 1975	Georeferenced point locations created by Roeland Kindt (ICRAF) in centre of 2.5 minutes AFRICLIM grid cells
Adansonia digitata	-1.97917	13.8542	Terrible tree species distribution map - georeferenced in Google Earth by Tor-Gunnar Vagen (ICRAF)	Terrible PB. Atlas de la Haute-Volta. Arbres et arbustes. Carte de répartition et de présence de 65 espèces. 1975	Georeferenced point locations created by Roeland Kindt (ICRAF) in centre of 2.5 minutes AFRICLIM grid cells
Adansonia digitata	-2.02083	13.8125	Terrible tree species distribution map - georeferenced in Google Earth by Tor-Gunnar Vagen (ICRAF)	Terrible PB. Atlas de la Haute-Volta. Arbres et arbustes. Carte de répartition et de présence de 65 espèces. 1975	Georeferenced point locations created by Roeland Kindt (ICRAF) in centre of 2.5 minutes AFRICLIM grid cells
Adansonia digitata	-2.3125	13.6458	Terrible tree species distribution map - georeferenced in Google Earth by Tor-Gunnar Vagen (ICRAF)	Terrible PB. Atlas de la Haute-Volta. Arbres et arbustes. Carte de répartition et de présence de 65 espèces. 1975	Georeferenced point locations created by Roeland Kindt (ICRAF) in centre of 2.5 minutes AFRICLIM grid cells
Adansonia digitata	-2.4375	13.8125	Terrible tree species distribution map - georeferenced in Google Earth by Tor-Gunnar Vagen (ICRAF)	Terrible PB. Atlas de la Haute-Volta. Arbres et arbustes. Carte de répartition et de présence de 65 espèces. 1975	Georeferenced point locations created by Roeland Kindt (ICRAF) in centre of 2.5 minutes AFRICLIM grid cells
Adansonia digitata	-2.4375	13.7292	Terrible tree species distribution map - georeferenced in Google Earth by Tor-Gunnar Vagen (ICRAF)	Terrible PB. Atlas de la Haute-Volta. Arbres et arbustes. Carte de répartition et de présence de 65 espèces. 1975	Georeferenced point locations created by Roeland Kindt (ICRAF) in centre of 2.5 minutes AFRICLIM grid cells
Adansonia digitata	-2.60417	13.7708	Terrible tree species distribution map - georeferenced in Google Earth by Tor-Gunnar Vagen (ICRAF)	Terrible PB. Atlas de la Haute-Volta. Arbres et arbustes. Carte de répartition et de présence de 65 espèces. 1975	Georeferenced point locations created by Roeland Kindt (ICRAF) in centre of 2.5 minutes AFRICLIM grid cells
Adansonia digitata	-1.89583	13.0208	Terrible tree species distribution map - georeferenced in Google Earth by Tor-Gunnar Vagen (ICRAF)	Terrible PB. Atlas de la Haute-Volta. Arbres et arbustes. Carte de répartition et de présence de 65 espèces. 1975	Georeferenced point locations created by Roeland Kindt (ICRAF) in centre of 2.5 minutes AFRICLIM grid cells
Adansonia digitata	-2.14583	12.9792	Terrible tree species distribution map - georeferenced in Google Earth by Tor-Gunnar Vagen (ICRAF)	Terrible PB. Atlas de la Haute-Volta. Arbres et arbustes. Carte de répartition et de présence de 65 espèces. 1975	Georeferenced point locations created by Roeland Kindt (ICRAF) in centre of 2.5 minutes AFRICLIM grid cells
Adansonia digitata	-2.47917	12.3542	Terrible tree species distribution map - georeferenced in Google Earth by Tor-Gunnar Vagen (ICRAF)	Terrible PB. Atlas de la Haute-Volta. Arbres et arbustes. Carte de répartition et de présence de 65 espèces. 1975	Georeferenced point locations created by Roeland Kindt (ICRAF) in centre of 2.5 minutes AFRICLIM grid cells
Adansonia digitata	-2.89583	11.7708	Terrible tree species distribution map - georeferenced in Google Earth by Tor-Gunnar Vagen (ICRAF)	Terrible PB. Atlas de la Haute-Volta. Arbres et arbustes. Carte de répartition et de présence de 65 espèces. 1975	Georeferenced point locations created by Roeland Kindt (ICRAF) in centre of 2.5 minutes AFRICLIM grid cells
Adansonia digitata	-4.9375	11.1458	Terrible tree species distribution map - georeferenced in Google Earth by Tor-Gunnar Vagen (ICRAF)	Terrible PB. Atlas de la Haute-Volta. Arbres et arbustes. Carte de répartition et de présence de 65 espèces. 1975	Georeferenced point locations created by Roeland Kindt (ICRAF) in centre of 2.5 minutes AFRICLIM grid cells
Adansonia digitata	-4.97917	10.6875	Terrible tree species distribution map - georeferenced in Google Earth by Tor-Gunnar Vagen (ICRAF)	Terrible PB. Atlas de la Haute-Volta. Arbres et arbustes. Carte de répartition et de présence de 65 espèces. 1975	Georeferenced point locations created by Roeland Kindt (ICRAF) in centre of 2.5 minutes AFRICLIM grid cells
Adansonia digitata	-5.0625	10.5208	Terrible tree species distribution map - georeferenced in Google Earth by Tor-Gunnar Vagen (ICRAF)	Terrible PB. Atlas de la Haute-Volta. Arbres et arbustes. Carte de répartition et de présence de 65 espèces. 1975	Georeferenced point locations created by Roeland Kindt (ICRAF) in centre of 2.5 minutes AFRICLIM grid cells
Adansonia digitata	-3.60417	12.1042	Terrible tree species distribution map - georeferenced in Google Earth by Tor-Gunnar Vagen (ICRAF)	Terrible PB. Atlas de la Haute-Volta. Arbres et arbustes. Carte de répartition et de présence de 65 espèces. 1975	Georeferenced point locations created by Roeland Kindt (ICRAF) in centre of 2.5 minutes AFRICLIM grid cells
Adansonia digitata	-4.8125	10.7292	Terrible tree species distribution map - georeferenced in Google Earth by Tor-Gunnar Vagen (ICRAF)	Terrible PB. Atlas de la Haute-Volta. Arbres et arbustes. Carte de répartition et de présence de 65 espèces. 1975	Georeferenced point locations created by Roeland Kindt (ICRAF) in centre of 2.5 minutes AFRICLIM grid cells
Adansonia digitata	-3.4375	10.1042	Terrible tree species distribution map - georeferenced in Google Earth by Tor-Gunnar Vagen (ICRAF)	Terrible PB. Atlas de la Haute-Volta. Arbres et arbustes. Carte de répartition et de présence de 65 espèces. 1975	Georeferenced point locations created by Roeland Kindt (ICRAF) in centre of 2.5 minutes AFRICLIM grid cells
Adansonia digitata	-3.14583	11.1458	Terrible tree species distribution map - georeferenced in Google Earth by Tor-Gunnar Vagen (ICRAF)	Terrible PB. Atlas de la Haute-Volta. Arbres et arbustes. Carte de répartition et de présence de 65 espèces. 1975	Georeferenced point locations created by Roeland Kindt (ICRAF) in centre of 2.5 minutes AFRICLIM grid cells
Adansonia digitata	0.395833	12.4792	Terrible tree species distribution map - georeferenced in Google Earth by Tor-Gunnar Vagen (ICRAF)	Terrible PB. Atlas de la Haute-Volta. Arbres et arbustes. Carte de répartition et de présence de 65 espèces. 1975	Georeferenced point locations created by Roeland Kindt (ICRAF) in centre of 2.5 minutes AFRICLIM grid cells
Adansonia digitata	1.02083	12.3125	Terrible tree species distribution map - georeferenced in Google Earth by Tor-Gunnar Vagen (ICRAF)	Terrible PB. Atlas de la Haute-Volta. Arbres et arbustes. Carte de répartition et de présence de 65 espèces. 1975	Georeferenced point locations created by Roeland Kindt (ICRAF) in centre of 2.5 minutes AFRICLIM grid cells
Adansonia digitata	-1.10417	12.3958	Terrible tree species distribution map - georeferenced in Google Earth by Tor-Gunnar Vagen (ICRAF)	Terrible PB. Atlas de la Haute-Volta. Arbres et arbustes. Carte de répartition et de présence de 65 espèces. 1975	Georeferenced point locations created by Roeland Kindt (ICRAF) in centre of 2.5 minutes AFRICLIM grid cells
Adansonia digitata	0.729167	12.0625	Terrible tree species distribution map - georeferenced in Google Earth by Tor-Gunnar Vagen (ICRAF)	Terrible PB. Atlas de la Haute-Volta. Arbres et arbustes. Carte de répartition et de présence de 65 espèces. 1975	Georeferenced point locations created by Roeland Kindt (ICRAF) in centre of 2.5 minutes AFRICLIM grid cells
Adansonia digitata	0.770833	12.0625	Terrible tree species distribution map - georeferenced in Google Earth by Tor-Gunnar Vagen (ICRAF)	Terrible PB. Atlas de la Haute-Volta. Arbres et arbustes. Carte de répartition et de présence de 65 espèces. 1975	Georeferenced point locations created by Roeland Kindt (ICRAF) in centre of 2.5 minutes AFRICLIM grid cells
Annona senegalensis	-1.633	11.183	AAU Herbarium Database	AAU Herbarium Database (access 04/2013) http://www.aubot.dk/search_form.php	freely available data from the Aarhus herbarium
Annona senegalensis	-1.583	11.266	AAU Herbarium Database	AAU Herbarium Database (access 04/2013) http://www.aubot.dk/search_form.php	freely available data from the Aarhus herbarium
Annona senegalensis	-0.35	11.75	AAU Herbarium Database	AAU Herbarium Database (access 04/2013) http://www.aubot.dk/search_form.php	freely available data from the Aarhus herbarium
Annona senegalensis	-0.333	11.75	AAU Herbarium Database	AAU Herbarium Database (access 04/2013) http://www.aubot.dk/search_form.php	freely available data from the Aarhus herbarium
Annona senegalensis	-3.26667	10.0833	SeSam - Senckenbergische Sammlungsdatenbanken (Herbarium Senckenbergianum)	Brandis, D., Menner, L., Allspach, A. and Türkay, M. 2007. The collection Management System SeSam of the Senckenberg Research Institute. Zoology 110: 161-162.	collection data
Annona senegalensis	1.36667	10.3167	SeSam - Senckenbergische Sammlungsdatenbanken (Herbarium Senckenbergianum)	Brandis, D., Menner, L., Allspach, A. and Türkay, M. 2007. The collection Management System SeSam of the Senckenberg Research Institute. Zoology 110: 161-162.	collection data
Annona senegalensis	-3.23333	10.8167	SeSam - Senckenbergische Sammlungsdatenbanken (Herbarium Senckenbergianum)	Brandis, D., Menner, L., Allspach, A. and Türkay, M. 2007. The collection Management System SeSam of the Senckenberg Research Institute. Zoology 110: 161-162.	collection data
Annona senegalensis	1.05	11.05	SeSam - Senckenbergische Sammlungsdatenbanken (Herbarium Senckenbergianum)	Brandis, D., Menner, L., Allspach, A. and Türkay, M. 2007. The collection Management System SeSam of the Senckenberg Research Institute. Zoology 110: 161-162.	collection data
Annona senegalensis	0.75	11.25	SeSam - Senckenbergische Sammlungsdatenbanken (Herbarium Senckenbergianum)	Brandis, D., Menner, L., Allspach, A. and Türkay, M. 2007. The collection Management System SeSam of the Senckenberg Research Institute. Zoology 110: 161-162.	collection data
Annona senegalensis	2.31347	11.8842	SeSam - Senckenbergische Sammlungsdatenbanken (Herbarium Senckenbergianum)	Brandis, D., Menner, L., Allspach, A. and Türkay, M. 2007. The collection Management System SeSam of the Senckenberg Research Institute. Zoology 110: 161-162.	collection data
Annona senegalensis	-0.316667	11.9	SeSam - Senckenbergische Sammlungsdatenbanken (Herbarium Senckenbergianum)	Brandis, D., Menner, L., Allspach, A. and Türkay, M. 2007. The collection Management System SeSam of the Senckenberg Research Institute. Zoology 110: 161-162.	collection data
Annona senegalensis	0.35	12.0667	SeSam - Senckenbergische Sammlungsdatenbanken (Herbarium Senckenbergianum)	Brandis, D., Menner, L., Allspach, A. and Türkay, M. 2007. The collection Management System SeSam of the Senckenberg Research Institute. Zoology 110: 161-162.	collection data
Annona senegalensis	1.8	12.15	SeSam - Senckenbergische Sammlungsdatenbanken (Herbarium Senckenbergianum)	Brandis, D., Menner, L., Allspach, A. and Türkay, M. 2007. The collection Management System SeSam of the Senckenberg Research Institute. Zoology 110: 161-162.	collection data
Annona senegalensis	-0.0333333	14.05	SeSam - Senckenbergische Sammlungsdatenbanken (Herbarium Senckenbergianum)	Brandis, D., Menner, L., Allspach, A. and Türkay, M. 2007. The collection Management System SeSam of the Senckenberg Research Institute. Zoology 110: 161-162.	collection data
Annona senegalensis	-7.92528	8.04167	West African Vegetation Database - records of Herbarium Senckenbergianum	Schmidt M, Janßen T, Dressler S, Hahn K, Hien M, Konaté S, Lykke AM, Mahamane A, Sambou B, Sinsin B, Thiombiano A, Wittig R, Zizka G (2012) The West African Vegetation Database. Biodiversity and Ecology 4: 105-110.	observation data
Annona senegalensis	-3.59778	9.835	West African Vegetation Database - records of Herbarium Senckenbergianum	Schmidt M, Janßen T, Dressler S, Hahn K, Hien M, Konaté S, Lykke AM, Mahamane A, Sambou B, Sinsin B, Thiombiano A, Wittig R, Zizka G (2012) The West African Vegetation Database. Biodiversity and Ecology 4: 105-110.	observation data
Annona senegalensis	1.64553	9.97912	West African Vegetation Database - records of Herbarium Senckenbergianum	Schmidt M, Janßen T, Dressler S, Hahn K, Hien M, Konaté S, Lykke AM, Mahamane A, Sambou B, Sinsin B, Thiombiano A, Wittig R, Zizka G (2012) The West African Vegetation Database. Biodiversity and Ecology 4: 105-110.	observation data
Annona senegalensis	1.63538	9.99083	West African Vegetation Database - records of Herbarium Senckenbergianum	Schmidt M, Janßen T, Dressler S, Hahn K, Hien M, Konaté S, Lykke AM, Mahamane A, Sambou B, Sinsin B, Thiombiano A, Wittig R, Zizka G (2012) The West African Vegetation Database. Biodiversity and Ecology 4: 105-110.	observation data
Annona senegalensis	1.63523	9.99128	West African Vegetation Database - records of Herbarium Senckenbergianum	Schmidt M, Janßen T, Dressler S, Hahn K, Hien M, Konaté S, Lykke AM, Mahamane A, Sambou B, Sinsin B, Thiombiano A, Wittig R, Zizka G (2012) The West African Vegetation Database. Biodiversity and Ecology 4: 105-110.	observation data
Annona senegalensis	1.63192	9.9953	West African Vegetation Database - records of Herbarium Senckenbergianum	Schmidt M, Janßen T, Dressler S, Hahn K, Hien M, Konaté S, Lykke AM, Mahamane A, Sambou B, Sinsin B, Thiombiano A, Wittig R, Zizka G (2012) The West African Vegetation Database. Biodiversity and Ecology 4: 105-110.	observation data
Annona senegalensis	1.63322	9.99575	West African Vegetation Database - records of Herbarium Senckenbergianum	Schmidt M, Janßen T, Dressler S, Hahn K, Hien M, Konaté S, Lykke AM, Mahamane A, Sambou B, Sinsin B, Thiombiano A, Wittig R, Zizka G (2012) The West African Vegetation Database. Biodiversity and Ecology 4: 105-110.	observation data
Annona senegalensis	1.47052	10.0181	West African Vegetation Database - records of Herbarium Senckenbergianum	Schmidt M, Janßen T, Dressler S, Hahn K, Hien M, Konaté S, Lykke AM, Mahamane A, Sambou B, Sinsin B, Thiombiano A, Wittig R, Zizka G (2012) The West African Vegetation Database. Biodiversity and Ecology 4: 105-110.	observation data
Annona senegalensis	1.46952	10.0226	West African Vegetation Database - records of Herbarium Senckenbergianum	Schmidt M, Janßen T, Dressler S, Hahn K, Hien M, Konaté S, Lykke AM, Mahamane A, Sambou B, Sinsin B, Thiombiano A, Wittig R, Zizka G (2012) The West African Vegetation Database. Biodiversity and Ecology 4: 105-110.	observation data
Annona senegalensis	1.4638	10.0226	West African Vegetation Database - records of Herbarium Senckenbergianum	Schmidt M, Janßen T, Dressler S, Hahn K, Hien M, Konaté S, Lykke AM, Mahamane A, Sambou B, Sinsin B, Thiombiano A, Wittig R, Zizka G (2012) The West African Vegetation Database. Biodiversity and Ecology 4: 105-110.	observation data
Annona senegalensis	1.47745	10.0264	West African Vegetation Database - records of Herbarium Senckenbergianum	Schmidt M, Janßen T, Dressler S, Hahn K, Hien M, Konaté S, Lykke AM, Mahamane A, Sambou B, Sinsin B, Thiombiano A, Wittig R, Zizka G (2012) The West African Vegetation Database. Biodiversity and Ecology 4: 105-110.	observation data
Annona senegalensis	1.47673	10.0266	West African Vegetation Database - records of Herbarium Senckenbergianum	Schmidt M, Janßen T, Dressler S, Hahn K, Hien M, Konaté S, Lykke AM, Mahamane A, Sambou B, Sinsin B, Thiombiano A, Wittig R, Zizka G (2012) The West African Vegetation Database. Biodiversity and Ecology 4: 105-110.	observation data
Annona senegalensis	1.46873	10.0296	West African Vegetation Database - records of Herbarium Senckenbergianum	Schmidt M, Janßen T, Dressler S, Hahn K, Hien M, Konaté S, Lykke AM, Mahamane A, Sambou B, Sinsin B, Thiombiano A, Wittig R, Zizka G (2012) The West African Vegetation Database. Biodiversity and Ecology 4: 105-110.	observation data
Annona senegalensis	1.52595	10.0315	West African Vegetation Database - records of Herbarium Senckenbergianum	Schmidt M, Janßen T, Dressler S, Hahn K, Hien M, Konaté S, Lykke AM, Mahamane A, Sambou B, Sinsin B, Thiombiano A, Wittig R, Zizka G (2012) The West African Vegetation Database. Biodiversity and Ecology 4: 105-110.	observation data
Annona senegalensis	1.52513	10.0317	West African Vegetation Database - records of Herbarium Senckenbergianum	Schmidt M, Janßen T, Dressler S, Hahn K, Hien M, Konaté S, Lykke AM, Mahamane A, Sambou B, Sinsin B, Thiombiano A, Wittig R, Zizka G (2012) The West African Vegetation Database. Biodiversity and Ecology 4: 105-110.	observation data
Annona senegalensis	1.51965	10.0319	West African Vegetation Database - records of Herbarium Senckenbergianum	Schmidt M, Janßen T, Dressler S, Hahn K, Hien M, Konaté S, Lykke AM, Mahamane A, Sambou B, Sinsin B, Thiombiano A, Wittig R, Zizka G (2012) The West African Vegetation Database. Biodiversity and Ecology 4: 105-110.	observation data
Annona senegalensis	1.49405	10.0357	West African Vegetation Database - records of Herbarium Senckenbergianum	Schmidt M, Janßen T, Dressler S, Hahn K, Hien M, Konaté S, Lykke AM, Mahamane A, Sambou B, Sinsin B, Thiombiano A, Wittig R, Zizka G (2012) The West African Vegetation Database. Biodiversity and Ecology 4: 105-110.	observation data
Annona senegalensis	1.49377	10.04	West African Vegetation Database - records of Herbarium Senckenbergianum	Schmidt M, Janßen T, Dressler S, Hahn K, Hien M, Konaté S, Lykke AM, Mahamane A, Sambou B, Sinsin B, Thiombiano A, Wittig R, Zizka G (2012) The West African Vegetation Database. Biodiversity and Ecology 4: 105-110.	observation data
Annona senegalensis	1.50117	10.0426	West African Vegetation Database - records of Herbarium Senckenbergianum	Schmidt M, Janßen T, Dressler S, Hahn K, Hien M, Konaté S, Lykke AM, Mahamane A, Sambou B, Sinsin B, Thiombiano A, Wittig R, Zizka G (2012) The West African Vegetation Database. Biodiversity and Ecology 4: 105-110.	observation data
Annona senegalensis	1.49972	10.0438	West African Vegetation Database - records of Herbarium Senckenbergianum	Schmidt M, Janßen T, Dressler S, Hahn K, Hien M, Konaté S, Lykke AM, Mahamane A, Sambou B, Sinsin B, Thiombiano A, Wittig R, Zizka G (2012) The West African Vegetation Database. Biodiversity and Ecology 4: 105-110.	observation data
Annona senegalensis	1.5049	10.0667	West African Vegetation Database - records of Herbarium Senckenbergianum	Schmidt M, Janßen T, Dressler S, Hahn K, Hien M, Konaté S, Lykke AM, Mahamane A, Sambou B, Sinsin B, Thiombiano A, Wittig R, Zizka G (2012) The West African Vegetation Database. Biodiversity and Ecology 4: 105-110.	observation data
Annona senegalensis	1.50605	10.0674	West African Vegetation Database - records of Herbarium Senckenbergianum	Schmidt M, Janßen T, Dressler S, Hahn K, Hien M, Konaté S, Lykke AM, Mahamane A, Sambou B, Sinsin B, Thiombiano A, Wittig R, Zizka G (2012) The West African Vegetation Database. Biodiversity and Ecology 4: 105-110.	observation data
Annona senegalensis	1.5063	10.0676	West African Vegetation Database - records of Herbarium Senckenbergianum	Schmidt M, Janßen T, Dressler S, Hahn K, Hien M, Konaté S, Lykke AM, Mahamane A, Sambou B, Sinsin B, Thiombiano A, Wittig R, Zizka G (2012) The West African Vegetation Database. Biodiversity and Ecology 4: 105-110.	observation data
Annona senegalensis	1.50403	10.0678	West African Vegetation Database - records of Herbarium Senckenbergianum	Schmidt M, Janßen T, Dressler S, Hahn K, Hien M, Konaté S, Lykke AM, Mahamane A, Sambou B, Sinsin B, Thiombiano A, Wittig R, Zizka G (2012) The West African Vegetation Database. Biodiversity and Ecology 4: 105-110.	observation data
Annona senegalensis	1.50495	10.0686	West African Vegetation Database - records of Herbarium Senckenbergianum	Schmidt M, Janßen T, Dressler S, Hahn K, Hien M, Konaté S, Lykke AM, Mahamane A, Sambou B, Sinsin B, Thiombiano A, Wittig R, Zizka G (2012) The West African Vegetation Database. Biodiversity and Ecology 4: 105-110.	observation data
Annona senegalensis	1.47892	10.0716	West African Vegetation Database - records of Herbarium Senckenbergianum	Schmidt M, Janßen T, Dressler S, Hahn K, Hien M, Konaté S, Lykke AM, Mahamane A, Sambou B, Sinsin B, Thiombiano A, Wittig R, Zizka G (2012) The West African Vegetation Database. Biodiversity and Ecology 4: 105-110.	observation data
Annona senegalensis	1.49385	10.0724	West African Vegetation Database - records of Herbarium Senckenbergianum	Schmidt M, Janßen T, Dressler S, Hahn K, Hien M, Konaté S, Lykke AM, Mahamane A, Sambou B, Sinsin B, Thiombiano A, Wittig R, Zizka G (2012) The West African Vegetation Database. Biodiversity and Ecology 4: 105-110.	observation data
Annona senegalensis	1.49467	10.0726	West African Vegetation Database - records of Herbarium Senckenbergianum	Schmidt M, Janßen T, Dressler S, Hahn K, Hien M, Konaté S, Lykke AM, Mahamane A, Sambou B, Sinsin B, Thiombiano A, Wittig R, Zizka G (2012) The West African Vegetation Database. Biodiversity and Ecology 4: 105-110.	observation data
Annona senegalensis	1.50133	10.0738	West African Vegetation Database - records of Herbarium Senckenbergianum	Schmidt M, Janßen T, Dressler S, Hahn K, Hien M, Konaté S, Lykke AM, Mahamane A, Sambou B, Sinsin B, Thiombiano A, Wittig R, Zizka G (2012) The West African Vegetation Database. Biodiversity and Ecology 4: 105-110.	observation data
Annona senegalensis	1.50263	10.075	West African Vegetation Database - records of Herbarium Senckenbergianum	Schmidt M, Janßen T, Dressler S, Hahn K, Hien M, Konaté S, Lykke AM, Mahamane A, Sambou B, Sinsin B, Thiombiano A, Wittig R, Zizka G (2012) The West African Vegetation Database. Biodiversity and Ecology 4: 105-110.	observation data
Annona senegalensis	1.47627	10.0851	West African Vegetation Database - records of Herbarium Senckenbergianum	Schmidt M, Janßen T, Dressler S, Hahn K, Hien M, Konaté S, Lykke AM, Mahamane A, Sambou B, Sinsin B, Thiombiano A, Wittig R, Zizka G (2012) The West African Vegetation Database. Biodiversity and Ecology 4: 105-110.	observation data
Annona senegalensis	1.50778	10.0972	West African Vegetation Database - records of Herbarium Senckenbergianum	Schmidt M, Janßen T, Dressler S, Hahn K, Hien M, Konaté S, Lykke AM, Mahamane A, Sambou B, Sinsin B, Thiombiano A, Wittig R, Zizka G (2012) The West African Vegetation Database. Biodiversity and Ecology 4: 105-110.	observation data
Annona senegalensis	1.50432	10.1019	West African Vegetation Database - records of Herbarium Senckenbergianum	Schmidt M, Janßen T, Dressler S, Hahn K, Hien M, Konaté S, Lykke AM, Mahamane A, Sambou B, Sinsin B, Thiombiano A, Wittig R, Zizka G (2012) The West African Vegetation Database. Biodiversity and Ecology 4: 105-110.	observation data
Annona senegalensis	1.50327	10.1026	West African Vegetation Database - records of Herbarium Senckenbergianum	Schmidt M, Janßen T, Dressler S, Hahn K, Hien M, Konaté S, Lykke AM, Mahamane A, Sambou B, Sinsin B, Thiombiano A, Wittig R, Zizka G (2012) The West African Vegetation Database. Biodiversity and Ecology 4: 105-110.	observation data
Annona senegalensis	1.51655	10.1338	West African Vegetation Database - records of Herbarium Senckenbergianum	Schmidt M, Janßen T, Dressler S, Hahn K, Hien M, Konaté S, Lykke AM, Mahamane A, Sambou B, Sinsin B, Thiombiano A, Wittig R, Zizka G (2012) The West African Vegetation Database. Biodiversity and Ecology 4: 105-110.	observation data
Annona senegalensis	1.52305	10.1363	West African Vegetation Database - records of Herbarium Senckenbergianum	Schmidt M, Janßen T, Dressler S, Hahn K, Hien M, Konaté S, Lykke AM, Mahamane A, Sambou B, Sinsin B, Thiombiano A, Wittig R, Zizka G (2012) The West African Vegetation Database. Biodiversity and Ecology 4: 105-110.	observation data
Annona senegalensis	2.25145	10.1375	West African Vegetation Database - records of Herbarium Senckenbergianum	Schmidt M, Janßen T, Dressler S, Hahn K, Hien M, Konaté S, Lykke AM, Mahamane A, Sambou B, Sinsin B, Thiombiano A, Wittig R, Zizka G (2012) The West African Vegetation Database. Biodiversity and Ecology 4: 105-110.	observation data
Annona senegalensis	2.25784	10.1375	West African Vegetation Database - records of Herbarium Senckenbergianum	Schmidt M, Janßen T, Dressler S, Hahn K, Hien M, Konaté S, Lykke AM, Mahamane A, Sambou B, Sinsin B, Thiombiano A, Wittig R, Zizka G (2012) The West African Vegetation Database. Biodiversity and Ecology 4: 105-110.	observation data
Annona senegalensis	2.25692	10.1393	West African Vegetation Database - records of Herbarium Senckenbergianum	Schmidt M, Janßen T, Dressler S, Hahn K, Hien M, Konaté S, Lykke AM, Mahamane A, Sambou B, Sinsin B, Thiombiano A, Wittig R, Zizka G (2012) The West African Vegetation Database. Biodiversity and Ecology 4: 105-110.	observation data
Annona senegalensis	2.25144	10.142	West African Vegetation Database - records of Herbarium Senckenbergianum	Schmidt M, Janßen T, Dressler S, Hahn K, Hien M, Konaté S, Lykke AM, Mahamane A, Sambou B, Sinsin B, Thiombiano A, Wittig R, Zizka G (2012) The West African Vegetation Database. Biodiversity and Ecology 4: 105-110.	observation data
Annona senegalensis	2.25418	10.142	West African Vegetation Database - records of Herbarium Senckenbergianum	Schmidt M, Janßen T, Dressler S, Hahn K, Hien M, Konaté S, Lykke AM, Mahamane A, Sambou B, Sinsin B, Thiombiano A, Wittig R, Zizka G (2012) The West African Vegetation Database. Biodiversity and Ecology 4: 105-110.	observation data
Annona senegalensis	2.25601	10.142	West African Vegetation Database - records of Herbarium Senckenbergianum	Schmidt M, Janßen T, Dressler S, Hahn K, Hien M, Konaté S, Lykke AM, Mahamane A, Sambou B, Sinsin B, Thiombiano A, Wittig R, Zizka G (2012) The West African Vegetation Database. Biodiversity and Ecology 4: 105-110.	observation data
Annona senegalensis	2.24961	10.1447	West African Vegetation Database - records of Herbarium Senckenbergianum	Schmidt M, Janßen T, Dressler S, Hahn K, Hien M, Konaté S, Lykke AM, Mahamane A, Sambou B, Sinsin B, Thiombiano A, Wittig R, Zizka G (2012) The West African Vegetation Database. Biodiversity and Ecology 4: 105-110.	observation data
Annona senegalensis	2.25417	10.1447	West African Vegetation Database - records of Herbarium Senckenbergianum	Schmidt M, Janßen T, Dressler S, Hahn K, Hien M, Konaté S, Lykke AM, Mahamane A, Sambou B, Sinsin B, Thiombiano A, Wittig R, Zizka G (2012) The West African Vegetation Database. Biodiversity and Ecology 4: 105-110.	observation data
Annona senegalensis	1.18333	10.15	West African Vegetation Database - records of Herbarium Senckenbergianum	Schmidt M, Janßen T, Dressler S, Hahn K, Hien M, Konaté S, Lykke AM, Mahamane A, Sambou B, Sinsin B, Thiombiano A, Wittig R, Zizka G (2012) The West African Vegetation Database. Biodiversity and Ecology 4: 105-110.	observation data
Annona senegalensis	1.33	10.18	West African Vegetation Database - records of Herbarium Senckenbergianum	Schmidt M, Janßen T, Dressler S, Hahn K, Hien M, Konaté S, Lykke AM, Mahamane A, Sambou B, Sinsin B, Thiombiano A, Wittig R, Zizka G (2012) The West African Vegetation Database. Biodiversity and Ecology 4: 105-110.	observation data
Annona senegalensis	1.343	10.2376	West African Vegetation Database - records of Herbarium Senckenbergianum	Schmidt M, Janßen T, Dressler S, Hahn K, Hien M, Konaté S, Lykke AM, Mahamane A, Sambou B, Sinsin B, Thiombiano A, Wittig R, Zizka G (2012) The West African Vegetation Database. Biodiversity and Ecology 4: 105-110.	observation data
Annona senegalensis	1.35087	10.2414	West African Vegetation Database - records of Herbarium Senckenbergianum	Schmidt M, Janßen T, Dressler S, Hahn K, Hien M, Konaté S, Lykke AM, Mahamane A, Sambou B, Sinsin B, Thiombiano A, Wittig R, Zizka G (2012) The West African Vegetation Database. Biodiversity and Ecology 4: 105-110.	observation data
Annona senegalensis	1.35073	10.2419	West African Vegetation Database - records of Herbarium Senckenbergianum	Schmidt M, Janßen T, Dressler S, Hahn K, Hien M, Konaté S, Lykke AM, Mahamane A, Sambou B, Sinsin B, Thiombiano A, Wittig R, Zizka G (2012) The West African Vegetation Database. Biodiversity and Ecology 4: 105-110.	observation data
Annona senegalensis	1.3591	10.2426	West African Vegetation Database - records of Herbarium Senckenbergianum	Schmidt M, Janßen T, Dressler S, Hahn K, Hien M, Konaté S, Lykke AM, Mahamane A, Sambou B, Sinsin B, Thiombiano A, Wittig R, Zizka G (2012) The West African Vegetation Database. Biodiversity and Ecology 4: 105-110.	observation data
Annona senegalensis	1.35792	10.2429	West African Vegetation Database - records of Herbarium Senckenbergianum	Schmidt M, Janßen T, Dressler S, Hahn K, Hien M, Konaté S, Lykke AM, Mahamane A, Sambou B, Sinsin B, Thiombiano A, Wittig R, Zizka G (2012) The West African Vegetation Database. Biodiversity and Ecology 4: 105-110.	observation data
Annona senegalensis	1.36212	10.2454	West African Vegetation Database - records of Herbarium Senckenbergianum	Schmidt M, Janßen T, Dressler S, Hahn K, Hien M, Konaté S, Lykke AM, Mahamane A, Sambou B, Sinsin B, Thiombiano A, Wittig R, Zizka G (2012) The West African Vegetation Database. Biodiversity and Ecology 4: 105-110.	observation data
Annona senegalensis	1.36025	10.2454	West African Vegetation Database - records of Herbarium Senckenbergianum	Schmidt M, Janßen T, Dressler S, Hahn K, Hien M, Konaté S, Lykke AM, Mahamane A, Sambou B, Sinsin B, Thiombiano A, Wittig R, Zizka G (2012) The West African Vegetation Database. Biodiversity and Ecology 4: 105-110.	observation data
Annona senegalensis	1.36243	10.2469	West African Vegetation Database - records of Herbarium Senckenbergianum	Schmidt M, Janßen T, Dressler S, Hahn K, Hien M, Konaté S, Lykke AM, Mahamane A, Sambou B, Sinsin B, Thiombiano A, Wittig R, Zizka G (2012) The West African Vegetation Database. Biodiversity and Ecology 4: 105-110.	observation data
Annona senegalensis	-4.88578	10.2629	West African Vegetation Database - records of Herbarium Senckenbergianum	Schmidt M, Janßen T, Dressler S, Hahn K, Hien M, Konaté S, Lykke AM, Mahamane A, Sambou B, Sinsin B, Thiombiano A, Wittig R, Zizka G (2012) The West African Vegetation Database. Biodiversity and Ecology 4: 105-110.	observation data
Annona senegalensis	1.3	10.35	West African Vegetation Database - records of Herbarium Senckenbergianum	Schmidt M, Janßen T, Dressler S, Hahn K, Hien M, Konaté S, Lykke AM, Mahamane A, Sambou B, Sinsin B, Thiombiano A, Wittig R, Zizka G (2012) The West African Vegetation Database. Biodiversity and Ecology 4: 105-110.	observation data
Annona senegalensis	2.25318	10.4104	West African Vegetation Database - records of Herbarium Senckenbergianum	Schmidt M, Janßen T, Dressler S, Hahn K, Hien M, Konaté S, Lykke AM, Mahamane A, Sambou B, Sinsin B, Thiombiano A, Wittig R, Zizka G (2012) The West African Vegetation Database. Biodiversity and Ecology 4: 105-110.	observation data
Annona senegalensis	2.24769	10.4122	West African Vegetation Database - records of Herbarium Senckenbergianum	Schmidt M, Janßen T, Dressler S, Hahn K, Hien M, Konaté S, Lykke AM, Mahamane A, Sambou B, Sinsin B, Thiombiano A, Wittig R, Zizka G (2012) The West African Vegetation Database. Biodiversity and Ecology 4: 105-110.	observation data
Annona senegalensis	2.24951	10.4149	West African Vegetation Database - records of Herbarium Senckenbergianum	Schmidt M, Janßen T, Dressler S, Hahn K, Hien M, Konaté S, Lykke AM, Mahamane A, Sambou B, Sinsin B, Thiombiano A, Wittig R, Zizka G (2012) The West African Vegetation Database. Biodiversity and Ecology 4: 105-110.	observation data
Annona senegalensis	2.24676	10.4176	West African Vegetation Database - records of Herbarium Senckenbergianum	Schmidt M, Janßen T, Dressler S, Hahn K, Hien M, Konaté S, Lykke AM, Mahamane A, Sambou B, Sinsin B, Thiombiano A, Wittig R, Zizka G (2012) The West African Vegetation Database. Biodiversity and Ecology 4: 105-110.	observation data
Annona senegalensis	2.25316	10.4176	West African Vegetation Database - records of Herbarium Senckenbergianum	Schmidt M, Janßen T, Dressler S, Hahn K, Hien M, Konaté S, Lykke AM, Mahamane A, Sambou B, Sinsin B, Thiombiano A, Wittig R, Zizka G (2012) The West African Vegetation Database. Biodiversity and Ecology 4: 105-110.	observation data
Annona senegalensis	1.45	10.45	West African Vegetation Database - records of Herbarium Senckenbergianum	Schmidt M, Janßen T, Dressler S, Hahn K, Hien M, Konaté S, Lykke AM, Mahamane A, Sambou B, Sinsin B, Thiombiano A, Wittig R, Zizka G (2012) The West African Vegetation Database. Biodiversity and Ecology 4: 105-110.	observation data
Annona senegalensis	-5.40913	10.7584	West African Vegetation Database - records of Herbarium Senckenbergianum	Schmidt M, Janßen T, Dressler S, Hahn K, Hien M, Konaté S, Lykke AM, Mahamane A, Sambou B, Sinsin B, Thiombiano A, Wittig R, Zizka G (2012) The West African Vegetation Database. Biodiversity and Ecology 4: 105-110.	observation data
Annona senegalensis	-4.66103	10.7871	West African Vegetation Database - records of Herbarium Senckenbergianum	Schmidt M, Janßen T, Dressler S, Hahn K, Hien M, Konaté S, Lykke AM, Mahamane A, Sambou B, Sinsin B, Thiombiano A, Wittig R, Zizka G (2012) The West African Vegetation Database. Biodiversity and Ecology 4: 105-110.	observation data
Annona senegalensis	-4.834	10.8714	West African Vegetation Database - records of Herbarium Senckenbergianum	Schmidt M, Janßen T, Dressler S, Hahn K, Hien M, Konaté S, Lykke AM, Mahamane A, Sambou B, Sinsin B, Thiombiano A, Wittig R, Zizka G (2012) The West African Vegetation Database. Biodiversity and Ecology 4: 105-110.	observation data
Annona senegalensis	1.46623	10.9045	West African Vegetation Database - records of Herbarium Senckenbergianum	Schmidt M, Janßen T, Dressler S, Hahn K, Hien M, Konaté S, Lykke AM, Mahamane A, Sambou B, Sinsin B, Thiombiano A, Wittig R, Zizka G (2012) The West African Vegetation Database. Biodiversity and Ecology 4: 105-110.	observation data
Annona senegalensis	1.54454	10.9552	West African Vegetation Database - records of Herbarium Senckenbergianum	Schmidt M, Janßen T, Dressler S, Hahn K, Hien M, Konaté S, Lykke AM, Mahamane A, Sambou B, Sinsin B, Thiombiano A, Wittig R, Zizka G (2012) The West African Vegetation Database. Biodiversity and Ecology 4: 105-110.	observation data
Annona senegalensis	1.56205	10.975	West African Vegetation Database - records of Herbarium Senckenbergianum	Schmidt M, Janßen T, Dressler S, Hahn K, Hien M, Konaté S, Lykke AM, Mahamane A, Sambou B, Sinsin B, Thiombiano A, Wittig R, Zizka G (2012) The West African Vegetation Database. Biodiversity and Ecology 4: 105-110.	observation data
Annona senegalensis	0.5241	10.9826	West African Vegetation Database - records of Herbarium Senckenbergianum	Schmidt M, Janßen T, Dressler S, Hahn K, Hien M, Konaté S, Lykke AM, Mahamane A, Sambou B, Sinsin B, Thiombiano A, Wittig R, Zizka G (2012) The West African Vegetation Database. Biodiversity and Ecology 4: 105-110.	observation data
Annona senegalensis	1.58941	11.0047	West African Vegetation Database - records of Herbarium Senckenbergianum	Schmidt M, Janßen T, Dressler S, Hahn K, Hien M, Konaté S, Lykke AM, Mahamane A, Sambou B, Sinsin B, Thiombiano A, Wittig R, Zizka G (2012) The West African Vegetation Database. Biodiversity and Ecology 4: 105-110.	observation data
Annona senegalensis	-4.74538	11.0752	West African Vegetation Database - records of Herbarium Senckenbergianum	Schmidt M, Janßen T, Dressler S, Hahn K, Hien M, Konaté S, Lykke AM, Mahamane A, Sambou B, Sinsin B, Thiombiano A, Wittig R, Zizka G (2012) The West African Vegetation Database. Biodiversity and Ecology 4: 105-110.	observation data
Annona senegalensis	-4.75333	11.0759	West African Vegetation Database - records of Herbarium Senckenbergianum	Schmidt M, Janßen T, Dressler S, Hahn K, Hien M, Konaté S, Lykke AM, Mahamane A, Sambou B, Sinsin B, Thiombiano A, Wittig R, Zizka G (2012) The West African Vegetation Database. Biodiversity and Ecology 4: 105-110.	observation data
Annona senegalensis	1.49297	11.0773	West African Vegetation Database - records of Herbarium Senckenbergianum	Schmidt M, Janßen T, Dressler S, Hahn K, Hien M, Konaté S, Lykke AM, Mahamane A, Sambou B, Sinsin B, Thiombiano A, Wittig R, Zizka G (2012) The West African Vegetation Database. Biodiversity and Ecology 4: 105-110.	observation data
Annona senegalensis	1.48914	11.0823	West African Vegetation Database - records of Herbarium Senckenbergianum	Schmidt M, Janßen T, Dressler S, Hahn K, Hien M, Konaté S, Lykke AM, Mahamane A, Sambou B, Sinsin B, Thiombiano A, Wittig R, Zizka G (2012) The West African Vegetation Database. Biodiversity and Ecology 4: 105-110.	observation data
Annona senegalensis	0.58827	11.0967	West African Vegetation Database - records of Herbarium Senckenbergianum	Schmidt M, Janßen T, Dressler S, Hahn K, Hien M, Konaté S, Lykke AM, Mahamane A, Sambou B, Sinsin B, Thiombiano A, Wittig R, Zizka G (2012) The West African Vegetation Database. Biodiversity and Ecology 4: 105-110.	observation data
Annona senegalensis	-4.60187	11.0972	West African Vegetation Database - records of Herbarium Senckenbergianum	Schmidt M, Janßen T, Dressler S, Hahn K, Hien M, Konaté S, Lykke AM, Mahamane A, Sambou B, Sinsin B, Thiombiano A, Wittig R, Zizka G (2012) The West African Vegetation Database. Biodiversity and Ecology 4: 105-110.	observation data
Annona senegalensis	0.7806	11.1144	West African Vegetation Database - records of Herbarium Senckenbergianum	Schmidt M, Janßen T, Dressler S, Hahn K, Hien M, Konaté S, Lykke AM, Mahamane A, Sambou B, Sinsin B, Thiombiano A, Wittig R, Zizka G (2012) The West African Vegetation Database. Biodiversity and Ecology 4: 105-110.	observation data
Annona senegalensis	0.81834	11.1842	West African Vegetation Database - records of Herbarium Senckenbergianum	Schmidt M, Janßen T, Dressler S, Hahn K, Hien M, Konaté S, Lykke AM, Mahamane A, Sambou B, Sinsin B, Thiombiano A, Wittig R, Zizka G (2012) The West African Vegetation Database. Biodiversity and Ecology 4: 105-110.	observation data
Annona senegalensis	0.78224	11.1991	West African Vegetation Database - records of Herbarium Senckenbergianum	Schmidt M, Janßen T, Dressler S, Hahn K, Hien M, Konaté S, Lykke AM, Mahamane A, Sambou B, Sinsin B, Thiombiano A, Wittig R, Zizka G (2012) The West African Vegetation Database. Biodiversity and Ecology 4: 105-110.	observation data
Annona senegalensis	0.76307	11.2172	West African Vegetation Database - records of Herbarium Senckenbergianum	Schmidt M, Janßen T, Dressler S, Hahn K, Hien M, Konaté S, Lykke AM, Mahamane A, Sambou B, Sinsin B, Thiombiano A, Wittig R, Zizka G (2012) The West African Vegetation Database. Biodiversity and Ecology 4: 105-110.	observation data
Annona senegalensis	0.7075	11.2497	West African Vegetation Database - records of Herbarium Senckenbergianum	Schmidt M, Janßen T, Dressler S, Hahn K, Hien M, Konaté S, Lykke AM, Mahamane A, Sambou B, Sinsin B, Thiombiano A, Wittig R, Zizka G (2012) The West African Vegetation Database. Biodiversity and Ecology 4: 105-110.	observation data
Annona senegalensis	0.68174	11.26	West African Vegetation Database - records of Herbarium Senckenbergianum	Schmidt M, Janßen T, Dressler S, Hahn K, Hien M, Konaté S, Lykke AM, Mahamane A, Sambou B, Sinsin B, Thiombiano A, Wittig R, Zizka G (2012) The West African Vegetation Database. Biodiversity and Ecology 4: 105-110.	observation data
Annona senegalensis	1.56662	11.271	West African Vegetation Database - records of Herbarium Senckenbergianum	Schmidt M, Janßen T, Dressler S, Hahn K, Hien M, Konaté S, Lykke AM, Mahamane A, Sambou B, Sinsin B, Thiombiano A, Wittig R, Zizka G (2012) The West African Vegetation Database. Biodiversity and Ecology 4: 105-110.	observation data
Annona senegalensis	1.01565	11.2844	West African Vegetation Database - records of Herbarium Senckenbergianum	Schmidt M, Janßen T, Dressler S, Hahn K, Hien M, Konaté S, Lykke AM, Mahamane A, Sambou B, Sinsin B, Thiombiano A, Wittig R, Zizka G (2012) The West African Vegetation Database. Biodiversity and Ecology 4: 105-110.	observation data
Annona senegalensis	1.57783	11.2849	West African Vegetation Database - records of Herbarium Senckenbergianum	Schmidt M, Janßen T, Dressler S, Hahn K, Hien M, Konaté S, Lykke AM, Mahamane A, Sambou B, Sinsin B, Thiombiano A, Wittig R, Zizka G (2012) The West African Vegetation Database. Biodiversity and Ecology 4: 105-110.	observation data
Annona senegalensis	1.58009	11.2881	West African Vegetation Database - records of Herbarium Senckenbergianum	Schmidt M, Janßen T, Dressler S, Hahn K, Hien M, Konaté S, Lykke AM, Mahamane A, Sambou B, Sinsin B, Thiombiano A, Wittig R, Zizka G (2012) The West African Vegetation Database. Biodiversity and Ecology 4: 105-110.	observation data
Annona senegalensis	1.60893	11.3516	West African Vegetation Database - records of Herbarium Senckenbergianum	Schmidt M, Janßen T, Dressler S, Hahn K, Hien M, Konaté S, Lykke AM, Mahamane A, Sambou B, Sinsin B, Thiombiano A, Wittig R, Zizka G (2012) The West African Vegetation Database. Biodiversity and Ecology 4: 105-110.	observation data
Annona senegalensis	1.59159	11.3887	West African Vegetation Database - records of Herbarium Senckenbergianum	Schmidt M, Janßen T, Dressler S, Hahn K, Hien M, Konaté S, Lykke AM, Mahamane A, Sambou B, Sinsin B, Thiombiano A, Wittig R, Zizka G (2012) The West African Vegetation Database. Biodiversity and Ecology 4: 105-110.	observation data
Annona senegalensis	1.58424	11.4104	West African Vegetation Database - records of Herbarium Senckenbergianum	Schmidt M, Janßen T, Dressler S, Hahn K, Hien M, Konaté S, Lykke AM, Mahamane A, Sambou B, Sinsin B, Thiombiano A, Wittig R, Zizka G (2012) The West African Vegetation Database. Biodiversity and Ecology 4: 105-110.	observation data
Annona senegalensis	1.56876	11.4483	West African Vegetation Database - records of Herbarium Senckenbergianum	Schmidt M, Janßen T, Dressler S, Hahn K, Hien M, Konaté S, Lykke AM, Mahamane A, Sambou B, Sinsin B, Thiombiano A, Wittig R, Zizka G (2012) The West African Vegetation Database. Biodiversity and Ecology 4: 105-110.	observation data
Annona senegalensis	1.56426	11.4561	West African Vegetation Database - records of Herbarium Senckenbergianum	Schmidt M, Janßen T, Dressler S, Hahn K, Hien M, Konaté S, Lykke AM, Mahamane A, Sambou B, Sinsin B, Thiombiano A, Wittig R, Zizka G (2012) The West African Vegetation Database. Biodiversity and Ecology 4: 105-110.	observation data
Annona senegalensis	-4.48162	11.5133	West African Vegetation Database - records of Herbarium Senckenbergianum	Schmidt M, Janßen T, Dressler S, Hahn K, Hien M, Konaté S, Lykke AM, Mahamane A, Sambou B, Sinsin B, Thiombiano A, Wittig R, Zizka G (2012) The West African Vegetation Database. Biodiversity and Ecology 4: 105-110.	observation data
Annona senegalensis	-3.43827	11.5343	West African Vegetation Database - records of Herbarium Senckenbergianum	Schmidt M, Janßen T, Dressler S, Hahn K, Hien M, Konaté S, Lykke AM, Mahamane A, Sambou B, Sinsin B, Thiombiano A, Wittig R, Zizka G (2012) The West African Vegetation Database. Biodiversity and Ecology 4: 105-110.	observation data
Annona senegalensis	2.47428	11.5509	West African Vegetation Database - records of Herbarium Senckenbergianum	Schmidt M, Janßen T, Dressler S, Hahn K, Hien M, Konaté S, Lykke AM, Mahamane A, Sambou B, Sinsin B, Thiombiano A, Wittig R, Zizka G (2012) The West African Vegetation Database. Biodiversity and Ecology 4: 105-110.	observation data
Annona senegalensis	2.47439	11.5512	West African Vegetation Database - records of Herbarium Senckenbergianum	Schmidt M, Janßen T, Dressler S, Hahn K, Hien M, Konaté S, Lykke AM, Mahamane A, Sambou B, Sinsin B, Thiombiano A, Wittig R, Zizka G (2012) The West African Vegetation Database. Biodiversity and Ecology 4: 105-110.	observation data
Annona senegalensis	2.47414	11.5685	West African Vegetation Database - records of Herbarium Senckenbergianum	Schmidt M, Janßen T, Dressler S, Hahn K, Hien M, Konaté S, Lykke AM, Mahamane A, Sambou B, Sinsin B, Thiombiano A, Wittig R, Zizka G (2012) The West African Vegetation Database. Biodiversity and Ecology 4: 105-110.	observation data
Annona senegalensis	2.47344	11.5686	West African Vegetation Database - records of Herbarium Senckenbergianum	Schmidt M, Janßen T, Dressler S, Hahn K, Hien M, Konaté S, Lykke AM, Mahamane A, Sambou B, Sinsin B, Thiombiano A, Wittig R, Zizka G (2012) The West African Vegetation Database. Biodiversity and Ecology 4: 105-110.	observation data
Annona senegalensis	2.47414	11.5688	West African Vegetation Database - records of Herbarium Senckenbergianum	Schmidt M, Janßen T, Dressler S, Hahn K, Hien M, Konaté S, Lykke AM, Mahamane A, Sambou B, Sinsin B, Thiombiano A, Wittig R, Zizka G (2012) The West African Vegetation Database. Biodiversity and Ecology 4: 105-110.	observation data
Annona senegalensis	2.47372	11.5692	West African Vegetation Database - records of Herbarium Senckenbergianum	Schmidt M, Janßen T, Dressler S, Hahn K, Hien M, Konaté S, Lykke AM, Mahamane A, Sambou B, Sinsin B, Thiombiano A, Wittig R, Zizka G (2012) The West African Vegetation Database. Biodiversity and Ecology 4: 105-110.	observation data
Annona senegalensis	1.45639	11.5704	West African Vegetation Database - records of Herbarium Senckenbergianum	Schmidt M, Janßen T, Dressler S, Hahn K, Hien M, Konaté S, Lykke AM, Mahamane A, Sambou B, Sinsin B, Thiombiano A, Wittig R, Zizka G (2012) The West African Vegetation Database. Biodiversity and Ecology 4: 105-110.	observation data
Annona senegalensis	2.48333	11.5756	West African Vegetation Database - records of Herbarium Senckenbergianum	Schmidt M, Janßen T, Dressler S, Hahn K, Hien M, Konaté S, Lykke AM, Mahamane A, Sambou B, Sinsin B, Thiombiano A, Wittig R, Zizka G (2012) The West African Vegetation Database. Biodiversity and Ecology 4: 105-110.	observation data
Annona senegalensis	2.48328	11.5757	West African Vegetation Database - records of Herbarium Senckenbergianum	Schmidt M, Janßen T, Dressler S, Hahn K, Hien M, Konaté S, Lykke AM, Mahamane A, Sambou B, Sinsin B, Thiombiano A, Wittig R, Zizka G (2012) The West African Vegetation Database. Biodiversity and Ecology 4: 105-110.	observation data
Annona senegalensis	2.45092	11.5802	West African Vegetation Database - records of Herbarium Senckenbergianum	Schmidt M, Janßen T, Dressler S, Hahn K, Hien M, Konaté S, Lykke AM, Mahamane A, Sambou B, Sinsin B, Thiombiano A, Wittig R, Zizka G (2012) The West African Vegetation Database. Biodiversity and Ecology 4: 105-110.	observation data
Annona senegalensis	2.45114	11.5802	West African Vegetation Database - records of Herbarium Senckenbergianum	Schmidt M, Janßen T, Dressler S, Hahn K, Hien M, Konaté S, Lykke AM, Mahamane A, Sambou B, Sinsin B, Thiombiano A, Wittig R, Zizka G (2012) The West African Vegetation Database. Biodiversity and Ecology 4: 105-110.	observation data
Annona senegalensis	2.45994	11.5803	West African Vegetation Database - records of Herbarium Senckenbergianum	Schmidt M, Janßen T, Dressler S, Hahn K, Hien M, Konaté S, Lykke AM, Mahamane A, Sambou B, Sinsin B, Thiombiano A, Wittig R, Zizka G (2012) The West African Vegetation Database. Biodiversity and Ecology 4: 105-110.	observation data
Annona senegalensis	2.46192	11.5803	West African Vegetation Database - records of Herbarium Senckenbergianum	Schmidt M, Janßen T, Dressler S, Hahn K, Hien M, Konaté S, Lykke AM, Mahamane A, Sambou B, Sinsin B, Thiombiano A, Wittig R, Zizka G (2012) The West African Vegetation Database. Biodiversity and Ecology 4: 105-110.	observation data
Annona senegalensis	2.462	11.5803	West African Vegetation Database - records of Herbarium Senckenbergianum	Schmidt M, Janßen T, Dressler S, Hahn K, Hien M, Konaté S, Lykke AM, Mahamane A, Sambou B, Sinsin B, Thiombiano A, Wittig R, Zizka G (2012) The West African Vegetation Database. Biodiversity and Ecology 4: 105-110.	observation data
Annona senegalensis	2.46022	11.5806	West African Vegetation Database - records of Herbarium Senckenbergianum	Schmidt M, Janßen T, Dressler S, Hahn K, Hien M, Konaté S, Lykke AM, Mahamane A, Sambou B, Sinsin B, Thiombiano A, Wittig R, Zizka G (2012) The West African Vegetation Database. Biodiversity and Ecology 4: 105-110.	observation data
Annona senegalensis	2.45781	11.5807	West African Vegetation Database - records of Herbarium Senckenbergianum	Schmidt M, Janßen T, Dressler S, Hahn K, Hien M, Konaté S, Lykke AM, Mahamane A, Sambou B, Sinsin B, Thiombiano A, Wittig R, Zizka G (2012) The West African Vegetation Database. Biodiversity and Ecology 4: 105-110.	observation data
Annona senegalensis	2.46042	11.5818	West African Vegetation Database - records of Herbarium Senckenbergianum	Schmidt M, Janßen T, Dressler S, Hahn K, Hien M, Konaté S, Lykke AM, Mahamane A, Sambou B, Sinsin B, Thiombiano A, Wittig R, Zizka G (2012) The West African Vegetation Database. Biodiversity and Ecology 4: 105-110.	observation data
Annona senegalensis	2.46169	11.5823	West African Vegetation Database - records of Herbarium Senckenbergianum	Schmidt M, Janßen T, Dressler S, Hahn K, Hien M, Konaté S, Lykke AM, Mahamane A, Sambou B, Sinsin B, Thiombiano A, Wittig R, Zizka G (2012) The West African Vegetation Database. Biodiversity and Ecology 4: 105-110.	observation data
Annona senegalensis	2.4585	11.5831	West African Vegetation Database - records of Herbarium Senckenbergianum	Schmidt M, Janßen T, Dressler S, Hahn K, Hien M, Konaté S, Lykke AM, Mahamane A, Sambou B, Sinsin B, Thiombiano A, Wittig R, Zizka G (2012) The West African Vegetation Database. Biodiversity and Ecology 4: 105-110.	observation data
Annona senegalensis	2.52167	11.6093	West African Vegetation Database - records of Herbarium Senckenbergianum	Schmidt M, Janßen T, Dressler S, Hahn K, Hien M, Konaté S, Lykke AM, Mahamane A, Sambou B, Sinsin B, Thiombiano A, Wittig R, Zizka G (2012) The West African Vegetation Database. Biodiversity and Ecology 4: 105-110.	observation data
Annona senegalensis	2.52144	11.6095	West African Vegetation Database - records of Herbarium Senckenbergianum	Schmidt M, Janßen T, Dressler S, Hahn K, Hien M, Konaté S, Lykke AM, Mahamane A, Sambou B, Sinsin B, Thiombiano A, Wittig R, Zizka G (2012) The West African Vegetation Database. Biodiversity and Ecology 4: 105-110.	observation data
Annona senegalensis	2.43897	11.6108	West African Vegetation Database - records of Herbarium Senckenbergianum	Schmidt M, Janßen T, Dressler S, Hahn K, Hien M, Konaté S, Lykke AM, Mahamane A, Sambou B, Sinsin B, Thiombiano A, Wittig R, Zizka G (2012) The West African Vegetation Database. Biodiversity and Ecology 4: 105-110.	observation data
Annona senegalensis	2.43908	11.6121	West African Vegetation Database - records of Herbarium Senckenbergianum	Schmidt M, Janßen T, Dressler S, Hahn K, Hien M, Konaté S, Lykke AM, Mahamane A, Sambou B, Sinsin B, Thiombiano A, Wittig R, Zizka G (2012) The West African Vegetation Database. Biodiversity and Ecology 4: 105-110.	observation data
Annona senegalensis	2.43919	11.6123	West African Vegetation Database - records of Herbarium Senckenbergianum	Schmidt M, Janßen T, Dressler S, Hahn K, Hien M, Konaté S, Lykke AM, Mahamane A, Sambou B, Sinsin B, Thiombiano A, Wittig R, Zizka G (2012) The West African Vegetation Database. Biodiversity and Ecology 4: 105-110.	observation data
Annona senegalensis	0.51837	11.6301	West African Vegetation Database - records of Herbarium Senckenbergianum	Schmidt M, Janßen T, Dressler S, Hahn K, Hien M, Konaté S, Lykke AM, Mahamane A, Sambou B, Sinsin B, Thiombiano A, Wittig R, Zizka G (2012) The West African Vegetation Database. Biodiversity and Ecology 4: 105-110.	observation data
Annona senegalensis	0.52119	11.6384	West African Vegetation Database - records of Herbarium Senckenbergianum	Schmidt M, Janßen T, Dressler S, Hahn K, Hien M, Konaté S, Lykke AM, Mahamane A, Sambou B, Sinsin B, Thiombiano A, Wittig R, Zizka G (2012) The West African Vegetation Database. Biodiversity and Ecology 4: 105-110.	observation data
Annona senegalensis	0.52668	11.6393	West African Vegetation Database - records of Herbarium Senckenbergianum	Schmidt M, Janßen T, Dressler S, Hahn K, Hien M, Konaté S, Lykke AM, Mahamane A, Sambou B, Sinsin B, Thiombiano A, Wittig R, Zizka G (2012) The West African Vegetation Database. Biodiversity and Ecology 4: 105-110.	observation data
Annona senegalensis	2.43725	11.6395	West African Vegetation Database - records of Herbarium Senckenbergianum	Schmidt M, Janßen T, Dressler S, Hahn K, Hien M, Konaté S, Lykke AM, Mahamane A, Sambou B, Sinsin B, Thiombiano A, Wittig R, Zizka G (2012) The West African Vegetation Database. Biodiversity and Ecology 4: 105-110.	observation data
Annona senegalensis	0.52118	11.6402	West African Vegetation Database - records of Herbarium Senckenbergianum	Schmidt M, Janßen T, Dressler S, Hahn K, Hien M, Konaté S, Lykke AM, Mahamane A, Sambou B, Sinsin B, Thiombiano A, Wittig R, Zizka G (2012) The West African Vegetation Database. Biodiversity and Ecology 4: 105-110.	observation data
Annona senegalensis	0.52484	11.6402	West African Vegetation Database - records of Herbarium Senckenbergianum	Schmidt M, Janßen T, Dressler S, Hahn K, Hien M, Konaté S, Lykke AM, Mahamane A, Sambou B, Sinsin B, Thiombiano A, Wittig R, Zizka G (2012) The West African Vegetation Database. Biodiversity and Ecology 4: 105-110.	observation data
Annona senegalensis	2.43783	11.6408	West African Vegetation Database - records of Herbarium Senckenbergianum	Schmidt M, Janßen T, Dressler S, Hahn K, Hien M, Konaté S, Lykke AM, Mahamane A, Sambou B, Sinsin B, Thiombiano A, Wittig R, Zizka G (2012) The West African Vegetation Database. Biodiversity and Ecology 4: 105-110.	observation data
Annona senegalensis	0.52209	11.6411	West African Vegetation Database - records of Herbarium Senckenbergianum	Schmidt M, Janßen T, Dressler S, Hahn K, Hien M, Konaté S, Lykke AM, Mahamane A, Sambou B, Sinsin B, Thiombiano A, Wittig R, Zizka G (2012) The West African Vegetation Database. Biodiversity and Ecology 4: 105-110.	observation data
Annona senegalensis	0.51932	11.6429	West African Vegetation Database - records of Herbarium Senckenbergianum	Schmidt M, Janßen T, Dressler S, Hahn K, Hien M, Konaté S, Lykke AM, Mahamane A, Sambou B, Sinsin B, Thiombiano A, Wittig R, Zizka G (2012) The West African Vegetation Database. Biodiversity and Ecology 4: 105-110.	observation data
Annona senegalensis	2.39247	11.6432	West African Vegetation Database - records of Herbarium Senckenbergianum	Schmidt M, Janßen T, Dressler S, Hahn K, Hien M, Konaté S, Lykke AM, Mahamane A, Sambou B, Sinsin B, Thiombiano A, Wittig R, Zizka G (2012) The West African Vegetation Database. Biodiversity and Ecology 4: 105-110.	observation data
Annona senegalensis	0.52115	11.6438	West African Vegetation Database - records of Herbarium Senckenbergianum	Schmidt M, Janßen T, Dressler S, Hahn K, Hien M, Konaté S, Lykke AM, Mahamane A, Sambou B, Sinsin B, Thiombiano A, Wittig R, Zizka G (2012) The West African Vegetation Database. Biodiversity and Ecology 4: 105-110.	observation data
Annona senegalensis	0.52755	11.6447	West African Vegetation Database - records of Herbarium Senckenbergianum	Schmidt M, Janßen T, Dressler S, Hahn K, Hien M, Konaté S, Lykke AM, Mahamane A, Sambou B, Sinsin B, Thiombiano A, Wittig R, Zizka G (2012) The West African Vegetation Database. Biodiversity and Ecology 4: 105-110.	observation data
Annona senegalensis	0.5193	11.6456	West African Vegetation Database - records of Herbarium Senckenbergianum	Schmidt M, Janßen T, Dressler S, Hahn K, Hien M, Konaté S, Lykke AM, Mahamane A, Sambou B, Sinsin B, Thiombiano A, Wittig R, Zizka G (2012) The West African Vegetation Database. Biodiversity and Ecology 4: 105-110.	observation data
Annona senegalensis	2.4065	11.6457	West African Vegetation Database - records of Herbarium Senckenbergianum	Schmidt M, Janßen T, Dressler S, Hahn K, Hien M, Konaté S, Lykke AM, Mahamane A, Sambou B, Sinsin B, Thiombiano A, Wittig R, Zizka G (2012) The West African Vegetation Database. Biodiversity and Ecology 4: 105-110.	observation data
Annona senegalensis	2.43958	11.646	West African Vegetation Database - records of Herbarium Senckenbergianum	Schmidt M, Janßen T, Dressler S, Hahn K, Hien M, Konaté S, Lykke AM, Mahamane A, Sambou B, Sinsin B, Thiombiano A, Wittig R, Zizka G (2012) The West African Vegetation Database. Biodiversity and Ecology 4: 105-110.	observation data
Annona senegalensis	2.43958	11.6464	West African Vegetation Database - records of Herbarium Senckenbergianum	Schmidt M, Janßen T, Dressler S, Hahn K, Hien M, Konaté S, Lykke AM, Mahamane A, Sambou B, Sinsin B, Thiombiano A, Wittig R, Zizka G (2012) The West African Vegetation Database. Biodiversity and Ecology 4: 105-110.	observation data
Annona senegalensis	2.40622	11.6465	West African Vegetation Database - records of Herbarium Senckenbergianum	Schmidt M, Janßen T, Dressler S, Hahn K, Hien M, Konaté S, Lykke AM, Mahamane A, Sambou B, Sinsin B, Thiombiano A, Wittig R, Zizka G (2012) The West African Vegetation Database. Biodiversity and Ecology 4: 105-110.	observation data
Annona senegalensis	2.43742	11.6473	West African Vegetation Database - records of Herbarium Senckenbergianum	Schmidt M, Janßen T, Dressler S, Hahn K, Hien M, Konaté S, Lykke AM, Mahamane A, Sambou B, Sinsin B, Thiombiano A, Wittig R, Zizka G (2012) The West African Vegetation Database. Biodiversity and Ecology 4: 105-110.	observation data
Annona senegalensis	2.43892	11.6489	West African Vegetation Database - records of Herbarium Senckenbergianum	Schmidt M, Janßen T, Dressler S, Hahn K, Hien M, Konaté S, Lykke AM, Mahamane A, Sambou B, Sinsin B, Thiombiano A, Wittig R, Zizka G (2012) The West African Vegetation Database. Biodiversity and Ecology 4: 105-110.	observation data
Annona senegalensis	2.43872	11.6491	West African Vegetation Database - records of Herbarium Senckenbergianum	Schmidt M, Janßen T, Dressler S, Hahn K, Hien M, Konaté S, Lykke AM, Mahamane A, Sambou B, Sinsin B, Thiombiano A, Wittig R, Zizka G (2012) The West African Vegetation Database. Biodiversity and Ecology 4: 105-110.	observation data
Annona senegalensis	2.45133	11.6559	West African Vegetation Database - records of Herbarium Senckenbergianum	Schmidt M, Janßen T, Dressler S, Hahn K, Hien M, Konaté S, Lykke AM, Mahamane A, Sambou B, Sinsin B, Thiombiano A, Wittig R, Zizka G (2012) The West African Vegetation Database. Biodiversity and Ecology 4: 105-110.	observation data
Annona senegalensis	2.35231	11.6606	West African Vegetation Database - records of Herbarium Senckenbergianum	Schmidt M, Janßen T, Dressler S, Hahn K, Hien M, Konaté S, Lykke AM, Mahamane A, Sambou B, Sinsin B, Thiombiano A, Wittig R, Zizka G (2012) The West African Vegetation Database. Biodiversity and Ecology 4: 105-110.	observation data
Annona senegalensis	2.51056	11.6612	West African Vegetation Database - records of Herbarium Senckenbergianum	Schmidt M, Janßen T, Dressler S, Hahn K, Hien M, Konaté S, Lykke AM, Mahamane A, Sambou B, Sinsin B, Thiombiano A, Wittig R, Zizka G (2012) The West African Vegetation Database. Biodiversity and Ecology 4: 105-110.	observation data
Annona senegalensis	2.36128	11.6617	West African Vegetation Database - records of Herbarium Senckenbergianum	Schmidt M, Janßen T, Dressler S, Hahn K, Hien M, Konaté S, Lykke AM, Mahamane A, Sambou B, Sinsin B, Thiombiano A, Wittig R, Zizka G (2012) The West African Vegetation Database. Biodiversity and Ecology 4: 105-110.	observation data
Annona senegalensis	2.44156	11.6672	West African Vegetation Database - records of Herbarium Senckenbergianum	Schmidt M, Janßen T, Dressler S, Hahn K, Hien M, Konaté S, Lykke AM, Mahamane A, Sambou B, Sinsin B, Thiombiano A, Wittig R, Zizka G (2012) The West African Vegetation Database. Biodiversity and Ecology 4: 105-110.	observation data
Annona senegalensis	2.44178	11.6676	West African Vegetation Database - records of Herbarium Senckenbergianum	Schmidt M, Janßen T, Dressler S, Hahn K, Hien M, Konaté S, Lykke AM, Mahamane A, Sambou B, Sinsin B, Thiombiano A, Wittig R, Zizka G (2012) The West African Vegetation Database. Biodiversity and Ecology 4: 105-110.	observation data
Annona senegalensis	-4.46152	11.6676	West African Vegetation Database - records of Herbarium Senckenbergianum	Schmidt M, Janßen T, Dressler S, Hahn K, Hien M, Konaté S, Lykke AM, Mahamane A, Sambou B, Sinsin B, Thiombiano A, Wittig R, Zizka G (2012) The West African Vegetation Database. Biodiversity and Ecology 4: 105-110.	observation data
Annona senegalensis	2.44056	11.6699	West African Vegetation Database - records of Herbarium Senckenbergianum	Schmidt M, Janßen T, Dressler S, Hahn K, Hien M, Konaté S, Lykke AM, Mahamane A, Sambou B, Sinsin B, Thiombiano A, Wittig R, Zizka G (2012) The West African Vegetation Database. Biodiversity and Ecology 4: 105-110.	observation data
Annona senegalensis	2.12345	11.6722	West African Vegetation Database - records of Herbarium Senckenbergianum	Schmidt M, Janßen T, Dressler S, Hahn K, Hien M, Konaté S, Lykke AM, Mahamane A, Sambou B, Sinsin B, Thiombiano A, Wittig R, Zizka G (2012) The West African Vegetation Database. Biodiversity and Ecology 4: 105-110.	observation data
Annona senegalensis	2.43994	11.6725	West African Vegetation Database - records of Herbarium Senckenbergianum	Schmidt M, Janßen T, Dressler S, Hahn K, Hien M, Konaté S, Lykke AM, Mahamane A, Sambou B, Sinsin B, Thiombiano A, Wittig R, Zizka G (2012) The West African Vegetation Database. Biodiversity and Ecology 4: 105-110.	observation data
Annona senegalensis	2.43964	11.6727	West African Vegetation Database - records of Herbarium Senckenbergianum	Schmidt M, Janßen T, Dressler S, Hahn K, Hien M, Konaté S, Lykke AM, Mahamane A, Sambou B, Sinsin B, Thiombiano A, Wittig R, Zizka G (2012) The West African Vegetation Database. Biodiversity and Ecology 4: 105-110.	observation data
Annona senegalensis	2.54339	11.682	West African Vegetation Database - records of Herbarium Senckenbergianum	Schmidt M, Janßen T, Dressler S, Hahn K, Hien M, Konaté S, Lykke AM, Mahamane A, Sambou B, Sinsin B, Thiombiano A, Wittig R, Zizka G (2012) The West African Vegetation Database. Biodiversity and Ecology 4: 105-110.	observation data
Annona senegalensis	-0.3242	11.7012	West African Vegetation Database - records of Herbarium Senckenbergianum	Schmidt M, Janßen T, Dressler S, Hahn K, Hien M, Konaté S, Lykke AM, Mahamane A, Sambou B, Sinsin B, Thiombiano A, Wittig R, Zizka G (2012) The West African Vegetation Database. Biodiversity and Ecology 4: 105-110.	observation data
Annona senegalensis	2.55875	11.7067	West African Vegetation Database - records of Herbarium Senckenbergianum	Schmidt M, Janßen T, Dressler S, Hahn K, Hien M, Konaté S, Lykke AM, Mahamane A, Sambou B, Sinsin B, Thiombiano A, Wittig R, Zizka G (2012) The West African Vegetation Database. Biodiversity and Ecology 4: 105-110.	observation data
Annona senegalensis	2.55864	11.7069	West African Vegetation Database - records of Herbarium Senckenbergianum	Schmidt M, Janßen T, Dressler S, Hahn K, Hien M, Konaté S, Lykke AM, Mahamane A, Sambou B, Sinsin B, Thiombiano A, Wittig R, Zizka G (2012) The West African Vegetation Database. Biodiversity and Ecology 4: 105-110.	observation data
Annona senegalensis	2.56383	11.7268	West African Vegetation Database - records of Herbarium Senckenbergianum	Schmidt M, Janßen T, Dressler S, Hahn K, Hien M, Konaté S, Lykke AM, Mahamane A, Sambou B, Sinsin B, Thiombiano A, Wittig R, Zizka G (2012) The West African Vegetation Database. Biodiversity and Ecology 4: 105-110.	observation data
Annona senegalensis	0.192167	11.7717	West African Vegetation Database - records of Herbarium Senckenbergianum	Schmidt M, Janßen T, Dressler S, Hahn K, Hien M, Konaté S, Lykke AM, Mahamane A, Sambou B, Sinsin B, Thiombiano A, Wittig R, Zizka G (2012) The West African Vegetation Database. Biodiversity and Ecology 4: 105-110.	observation data
Annona senegalensis	0.233233	11.8266	West African Vegetation Database - records of Herbarium Senckenbergianum	Schmidt M, Janßen T, Dressler S, Hahn K, Hien M, Konaté S, Lykke AM, Mahamane A, Sambou B, Sinsin B, Thiombiano A, Wittig R, Zizka G (2012) The West African Vegetation Database. Biodiversity and Ecology 4: 105-110.	observation data
Annona senegalensis	0.3809	11.8671	West African Vegetation Database - records of Herbarium Senckenbergianum	Schmidt M, Janßen T, Dressler S, Hahn K, Hien M, Konaté S, Lykke AM, Mahamane A, Sambou B, Sinsin B, Thiombiano A, Wittig R, Zizka G (2012) The West African Vegetation Database. Biodiversity and Ecology 4: 105-110.	observation data
Annona senegalensis	0.3809	11.8672	West African Vegetation Database - records of Herbarium Senckenbergianum	Schmidt M, Janßen T, Dressler S, Hahn K, Hien M, Konaté S, Lykke AM, Mahamane A, Sambou B, Sinsin B, Thiombiano A, Wittig R, Zizka G (2012) The West African Vegetation Database. Biodiversity and Ecology 4: 105-110.	observation data
Annona senegalensis	0.37539	11.868	West African Vegetation Database - records of Herbarium Senckenbergianum	Schmidt M, Janßen T, Dressler S, Hahn K, Hien M, Konaté S, Lykke AM, Mahamane A, Sambou B, Sinsin B, Thiombiano A, Wittig R, Zizka G (2012) The West African Vegetation Database. Biodiversity and Ecology 4: 105-110.	observation data
Annona senegalensis	0.37548	11.868	West African Vegetation Database - records of Herbarium Senckenbergianum	Schmidt M, Janßen T, Dressler S, Hahn K, Hien M, Konaté S, Lykke AM, Mahamane A, Sambou B, Sinsin B, Thiombiano A, Wittig R, Zizka G (2012) The West African Vegetation Database. Biodiversity and Ecology 4: 105-110.	observation data
Annona senegalensis	0.385133	11.8686	West African Vegetation Database - records of Herbarium Senckenbergianum	Schmidt M, Janßen T, Dressler S, Hahn K, Hien M, Konaté S, Lykke AM, Mahamane A, Sambou B, Sinsin B, Thiombiano A, Wittig R, Zizka G (2012) The West African Vegetation Database. Biodiversity and Ecology 4: 105-110.	observation data
Annona senegalensis	0.37996	11.8698	West African Vegetation Database - records of Herbarium Senckenbergianum	Schmidt M, Janßen T, Dressler S, Hahn K, Hien M, Konaté S, Lykke AM, Mahamane A, Sambou B, Sinsin B, Thiombiano A, Wittig R, Zizka G (2012) The West African Vegetation Database. Biodiversity and Ecology 4: 105-110.	observation data
Annona senegalensis	0.37985	11.8718	West African Vegetation Database - records of Herbarium Senckenbergianum	Schmidt M, Janßen T, Dressler S, Hahn K, Hien M, Konaté S, Lykke AM, Mahamane A, Sambou B, Sinsin B, Thiombiano A, Wittig R, Zizka G (2012) The West African Vegetation Database. Biodiversity and Ecology 4: 105-110.	observation data
Annona senegalensis	0.37856	11.8718	West African Vegetation Database - records of Herbarium Senckenbergianum	Schmidt M, Janßen T, Dressler S, Hahn K, Hien M, Konaté S, Lykke AM, Mahamane A, Sambou B, Sinsin B, Thiombiano A, Wittig R, Zizka G (2012) The West African Vegetation Database. Biodiversity and Ecology 4: 105-110.	observation data
Annona senegalensis	0.37535	11.8725	West African Vegetation Database - records of Herbarium Senckenbergianum	Schmidt M, Janßen T, Dressler S, Hahn K, Hien M, Konaté S, Lykke AM, Mahamane A, Sambou B, Sinsin B, Thiombiano A, Wittig R, Zizka G (2012) The West African Vegetation Database. Biodiversity and Ecology 4: 105-110.	observation data
Annona senegalensis	0.37902	11.8726	West African Vegetation Database - records of Herbarium Senckenbergianum	Schmidt M, Janßen T, Dressler S, Hahn K, Hien M, Konaté S, Lykke AM, Mahamane A, Sambou B, Sinsin B, Thiombiano A, Wittig R, Zizka G (2012) The West African Vegetation Database. Biodiversity and Ecology 4: 105-110.	observation data
Annona senegalensis	0.37442	11.8734	West African Vegetation Database - records of Herbarium Senckenbergianum	Schmidt M, Janßen T, Dressler S, Hahn K, Hien M, Konaté S, Lykke AM, Mahamane A, Sambou B, Sinsin B, Thiombiano A, Wittig R, Zizka G (2012) The West African Vegetation Database. Biodiversity and Ecology 4: 105-110.	observation data
Annona senegalensis	0.399833	11.8744	West African Vegetation Database - records of Herbarium Senckenbergianum	Schmidt M, Janßen T, Dressler S, Hahn K, Hien M, Konaté S, Lykke AM, Mahamane A, Sambou B, Sinsin B, Thiombiano A, Wittig R, Zizka G (2012) The West African Vegetation Database. Biodiversity and Ecology 4: 105-110.	observation data
Annona senegalensis	0.3978	11.8787	West African Vegetation Database - records of Herbarium Senckenbergianum	Schmidt M, Janßen T, Dressler S, Hahn K, Hien M, Konaté S, Lykke AM, Mahamane A, Sambou B, Sinsin B, Thiombiano A, Wittig R, Zizka G (2012) The West African Vegetation Database. Biodiversity and Ecology 4: 105-110.	observation data
Annona senegalensis	0.393917	11.8828	West African Vegetation Database - records of Herbarium Senckenbergianum	Schmidt M, Janßen T, Dressler S, Hahn K, Hien M, Konaté S, Lykke AM, Mahamane A, Sambou B, Sinsin B, Thiombiano A, Wittig R, Zizka G (2012) The West African Vegetation Database. Biodiversity and Ecology 4: 105-110.	observation data
Annona senegalensis	2.31347	11.8842	West African Vegetation Database - records of Herbarium Senckenbergianum	Schmidt M, Janßen T, Dressler S, Hahn K, Hien M, Konaté S, Lykke AM, Mahamane A, Sambou B, Sinsin B, Thiombiano A, Wittig R, Zizka G (2012) The West African Vegetation Database. Biodiversity and Ecology 4: 105-110.	observation data
Annona senegalensis	2.36158	11.9188	West African Vegetation Database - records of Herbarium Senckenbergianum	Schmidt M, Janßen T, Dressler S, Hahn K, Hien M, Konaté S, Lykke AM, Mahamane A, Sambou B, Sinsin B, Thiombiano A, Wittig R, Zizka G (2012) The West African Vegetation Database. Biodiversity and Ecology 4: 105-110.	observation data
Annona senegalensis	0.424867	11.9209	West African Vegetation Database - records of Herbarium Senckenbergianum	Schmidt M, Janßen T, Dressler S, Hahn K, Hien M, Konaté S, Lykke AM, Mahamane A, Sambou B, Sinsin B, Thiombiano A, Wittig R, Zizka G (2012) The West African Vegetation Database. Biodiversity and Ecology 4: 105-110.	observation data
Annona senegalensis	0.412717	11.9225	West African Vegetation Database - records of Herbarium Senckenbergianum	Schmidt M, Janßen T, Dressler S, Hahn K, Hien M, Konaté S, Lykke AM, Mahamane A, Sambou B, Sinsin B, Thiombiano A, Wittig R, Zizka G (2012) The West African Vegetation Database. Biodiversity and Ecology 4: 105-110.	observation data
Annona senegalensis	0.3983	11.9367	West African Vegetation Database - records of Herbarium Senckenbergianum	Schmidt M, Janßen T, Dressler S, Hahn K, Hien M, Konaté S, Lykke AM, Mahamane A, Sambou B, Sinsin B, Thiombiano A, Wittig R, Zizka G (2012) The West African Vegetation Database. Biodiversity and Ecology 4: 105-110.	observation data
Annona senegalensis	1.9225	11.9537	West African Vegetation Database - records of Herbarium Senckenbergianum	Schmidt M, Janßen T, Dressler S, Hahn K, Hien M, Konaté S, Lykke AM, Mahamane A, Sambou B, Sinsin B, Thiombiano A, Wittig R, Zizka G (2012) The West African Vegetation Database. Biodiversity and Ecology 4: 105-110.	observation data
Annona senegalensis	1.96121	11.9579	West African Vegetation Database - records of Herbarium Senckenbergianum	Schmidt M, Janßen T, Dressler S, Hahn K, Hien M, Konaté S, Lykke AM, Mahamane A, Sambou B, Sinsin B, Thiombiano A, Wittig R, Zizka G (2012) The West African Vegetation Database. Biodiversity and Ecology 4: 105-110.	observation data
Annona senegalensis	1.96075	11.9585	West African Vegetation Database - records of Herbarium Senckenbergianum	Schmidt M, Janßen T, Dressler S, Hahn K, Hien M, Konaté S, Lykke AM, Mahamane A, Sambou B, Sinsin B, Thiombiano A, Wittig R, Zizka G (2012) The West African Vegetation Database. Biodiversity and Ecology 4: 105-110.	observation data
Annona senegalensis	1.95823	11.9615	West African Vegetation Database - records of Herbarium Senckenbergianum	Schmidt M, Janßen T, Dressler S, Hahn K, Hien M, Konaté S, Lykke AM, Mahamane A, Sambou B, Sinsin B, Thiombiano A, Wittig R, Zizka G (2012) The West African Vegetation Database. Biodiversity and Ecology 4: 105-110.	observation data
Annona senegalensis	1.95671	11.9617	West African Vegetation Database - records of Herbarium Senckenbergianum	Schmidt M, Janßen T, Dressler S, Hahn K, Hien M, Konaté S, Lykke AM, Mahamane A, Sambou B, Sinsin B, Thiombiano A, Wittig R, Zizka G (2012) The West African Vegetation Database. Biodiversity and Ecology 4: 105-110.	observation data
Annona senegalensis	0.301783	11.9634	West African Vegetation Database - records of Herbarium Senckenbergianum	Schmidt M, Janßen T, Dressler S, Hahn K, Hien M, Konaté S, Lykke AM, Mahamane A, Sambou B, Sinsin B, Thiombiano A, Wittig R, Zizka G (2012) The West African Vegetation Database. Biodiversity and Ecology 4: 105-110.	observation data
Annona senegalensis	0.3587	11.9719	West African Vegetation Database - records of Herbarium Senckenbergianum	Schmidt M, Janßen T, Dressler S, Hahn K, Hien M, Konaté S, Lykke AM, Mahamane A, Sambou B, Sinsin B, Thiombiano A, Wittig R, Zizka G (2012) The West African Vegetation Database. Biodiversity and Ecology 4: 105-110.	observation data
Annona senegalensis	1.81498	11.9887	West African Vegetation Database - records of Herbarium Senckenbergianum	Schmidt M, Janßen T, Dressler S, Hahn K, Hien M, Konaté S, Lykke AM, Mahamane A, Sambou B, Sinsin B, Thiombiano A, Wittig R, Zizka G (2012) The West African Vegetation Database. Biodiversity and Ecology 4: 105-110.	observation data
Annona senegalensis	1.81773	11.9898	West African Vegetation Database - records of Herbarium Senckenbergianum	Schmidt M, Janßen T, Dressler S, Hahn K, Hien M, Konaté S, Lykke AM, Mahamane A, Sambou B, Sinsin B, Thiombiano A, Wittig R, Zizka G (2012) The West African Vegetation Database. Biodiversity and Ecology 4: 105-110.	observation data
Annona senegalensis	1.96677	11.9947	West African Vegetation Database - records of Herbarium Senckenbergianum	Schmidt M, Janßen T, Dressler S, Hahn K, Hien M, Konaté S, Lykke AM, Mahamane A, Sambou B, Sinsin B, Thiombiano A, Wittig R, Zizka G (2012) The West African Vegetation Database. Biodiversity and Ecology 4: 105-110.	observation data
Annona senegalensis	1.9777	11.997	West African Vegetation Database - records of Herbarium Senckenbergianum	Schmidt M, Janßen T, Dressler S, Hahn K, Hien M, Konaté S, Lykke AM, Mahamane A, Sambou B, Sinsin B, Thiombiano A, Wittig R, Zizka G (2012) The West African Vegetation Database. Biodiversity and Ecology 4: 105-110.	observation data
Annona senegalensis	1.93132	12.011	West African Vegetation Database - records of Herbarium Senckenbergianum	Schmidt M, Janßen T, Dressler S, Hahn K, Hien M, Konaté S, Lykke AM, Mahamane A, Sambou B, Sinsin B, Thiombiano A, Wittig R, Zizka G (2012) The West African Vegetation Database. Biodiversity and Ecology 4: 105-110.	observation data
Annona senegalensis	0.301217	12.0199	West African Vegetation Database - records of Herbarium Senckenbergianum	Schmidt M, Janßen T, Dressler S, Hahn K, Hien M, Konaté S, Lykke AM, Mahamane A, Sambou B, Sinsin B, Thiombiano A, Wittig R, Zizka G (2012) The West African Vegetation Database. Biodiversity and Ecology 4: 105-110.	observation data
Annona senegalensis	2.04338	12.0274	West African Vegetation Database - records of Herbarium Senckenbergianum	Schmidt M, Janßen T, Dressler S, Hahn K, Hien M, Konaté S, Lykke AM, Mahamane A, Sambou B, Sinsin B, Thiombiano A, Wittig R, Zizka G (2012) The West African Vegetation Database. Biodiversity and Ecology 4: 105-110.	observation data
Annona senegalensis	1.79237	12.0348	West African Vegetation Database - records of Herbarium Senckenbergianum	Schmidt M, Janßen T, Dressler S, Hahn K, Hien M, Konaté S, Lykke AM, Mahamane A, Sambou B, Sinsin B, Thiombiano A, Wittig R, Zizka G (2012) The West African Vegetation Database. Biodiversity and Ecology 4: 105-110.	observation data
Annona senegalensis	0.334483	12.0431	West African Vegetation Database - records of Herbarium Senckenbergianum	Schmidt M, Janßen T, Dressler S, Hahn K, Hien M, Konaté S, Lykke AM, Mahamane A, Sambou B, Sinsin B, Thiombiano A, Wittig R, Zizka G (2012) The West African Vegetation Database. Biodiversity and Ecology 4: 105-110.	observation data
Annona senegalensis	0.35	12.0667	West African Vegetation Database - records of Herbarium Senckenbergianum	Schmidt M, Janßen T, Dressler S, Hahn K, Hien M, Konaté S, Lykke AM, Mahamane A, Sambou B, Sinsin B, Thiombiano A, Wittig R, Zizka G (2012) The West African Vegetation Database. Biodiversity and Ecology 4: 105-110.	observation data
Annona senegalensis	1.78889	12.0708	West African Vegetation Database - records of Herbarium Senckenbergianum	Schmidt M, Janßen T, Dressler S, Hahn K, Hien M, Konaté S, Lykke AM, Mahamane A, Sambou B, Sinsin B, Thiombiano A, Wittig R, Zizka G (2012) The West African Vegetation Database. Biodiversity and Ecology 4: 105-110.	observation data
Annona senegalensis	0.204433	12.1055	West African Vegetation Database - records of Herbarium Senckenbergianum	Schmidt M, Janßen T, Dressler S, Hahn K, Hien M, Konaté S, Lykke AM, Mahamane A, Sambou B, Sinsin B, Thiombiano A, Wittig R, Zizka G (2012) The West African Vegetation Database. Biodiversity and Ecology 4: 105-110.	observation data
Annona senegalensis	1.84477	12.1617	West African Vegetation Database - records of Herbarium Senckenbergianum	Schmidt M, Janßen T, Dressler S, Hahn K, Hien M, Konaté S, Lykke AM, Mahamane A, Sambou B, Sinsin B, Thiombiano A, Wittig R, Zizka G (2012) The West African Vegetation Database. Biodiversity and Ecology 4: 105-110.	observation data
Annona senegalensis	0.98493	12.191	West African Vegetation Database - records of Herbarium Senckenbergianum	Schmidt M, Janßen T, Dressler S, Hahn K, Hien M, Konaté S, Lykke AM, Mahamane A, Sambou B, Sinsin B, Thiombiano A, Wittig R, Zizka G (2012) The West African Vegetation Database. Biodiversity and Ecology 4: 105-110.	observation data
Annona senegalensis	0.30113	12.2249	West African Vegetation Database - records of Herbarium Senckenbergianum	Schmidt M, Janßen T, Dressler S, Hahn K, Hien M, Konaté S, Lykke AM, Mahamane A, Sambou B, Sinsin B, Thiombiano A, Wittig R, Zizka G (2012) The West African Vegetation Database. Biodiversity and Ecology 4: 105-110.	observation data
Annona senegalensis	0.16749	12.3821	West African Vegetation Database - records of Herbarium Senckenbergianum	Schmidt M, Janßen T, Dressler S, Hahn K, Hien M, Konaté S, Lykke AM, Mahamane A, Sambou B, Sinsin B, Thiombiano A, Wittig R, Zizka G (2012) The West African Vegetation Database. Biodiversity and Ecology 4: 105-110.	observation data
Annona senegalensis	-0.0586667	14.0634	West African Vegetation Database - records of Herbarium Senckenbergianum	Schmidt M, Janßen T, Dressler S, Hahn K, Hien M, Konaté S, Lykke AM, Mahamane A, Sambou B, Sinsin B, Thiombiano A, Wittig R, Zizka G (2012) The West African Vegetation Database. Biodiversity and Ecology 4: 105-110.	observation data
Annona senegalensis	-0.0871944	14.0671	West African Vegetation Database - records of Herbarium Senckenbergianum	Schmidt M, Janßen T, Dressler S, Hahn K, Hien M, Konaté S, Lykke AM, Mahamane A, Sambou B, Sinsin B, Thiombiano A, Wittig R, Zizka G (2012) The West African Vegetation Database. Biodiversity and Ecology 4: 105-110.	observation data
Annona senegalensis	-4.88589	10.2628	West African Plants Database	Brunken U, Schmidt M, Dressler S, Janssen T, Thiombiano A, Zizka G (2008) www.westafricanplants.senckenberg.de - An image-based identification tool for West African Plants. Taxon 57 (3): 1027-1028.	georeferenced photo records
Annona senegalensis	-4.88589	10.2628	West African Plants Database	Brunken U, Schmidt M, Dressler S, Janssen T, Thiombiano A, Zizka G (2008) www.westafricanplants.senckenberg.de - An image-based identification tool for West African Plants. Taxon 57 (3): 1027-1028.	georeferenced photo records
Annona senegalensis	-4.88588	10.2628	West African Plants Database	Brunken U, Schmidt M, Dressler S, Janssen T, Thiombiano A, Zizka G (2008) www.westafricanplants.senckenberg.de - An image-based identification tool for West African Plants. Taxon 57 (3): 1027-1028.	georeferenced photo records
Annona senegalensis	-5.31133	10.6053	West African Plants Database	Brunken U, Schmidt M, Dressler S, Janssen T, Thiombiano A, Zizka G (2008) www.westafricanplants.senckenberg.de - An image-based identification tool for West African Plants. Taxon 57 (3): 1027-1028.	georeferenced photo records
Annona senegalensis	-3.52083	11.4792	Terrible tree species distribution map - georeferenced in Google Earth by Tor-Gunnar Vagen (ICRAF)	Terrible PB. Atlas de la Haute-Volta. Arbres et arbustes. Carte de répartition et de présence de 65 espèces. 1975	Georeferenced point locations created by Roeland Kindt (ICRAF) in centre of 2.5 minutes AFRICLIM grid cells
Annona senegalensis	-3.60417	11.8542	Terrible tree species distribution map - georeferenced in Google Earth by Tor-Gunnar Vagen (ICRAF)	Terrible PB. Atlas de la Haute-Volta. Arbres et arbustes. Carte de répartition et de présence de 65 espèces. 1975	Georeferenced point locations created by Roeland Kindt (ICRAF) in centre of 2.5 minutes AFRICLIM grid cells
Annona senegalensis	-3.64583	11.8958	Terrible tree species distribution map - georeferenced in Google Earth by Tor-Gunnar Vagen (ICRAF)	Terrible PB. Atlas de la Haute-Volta. Arbres et arbustes. Carte de répartition et de présence de 65 espèces. 1975	Georeferenced point locations created by Roeland Kindt (ICRAF) in centre of 2.5 minutes AFRICLIM grid cells
Annona senegalensis	-3.6875	11.8958	Terrible tree species distribution map - georeferenced in Google Earth by Tor-Gunnar Vagen (ICRAF)	Terrible PB. Atlas de la Haute-Volta. Arbres et arbustes. Carte de répartition et de présence de 65 espèces. 1975	Georeferenced point locations created by Roeland Kindt (ICRAF) in centre of 2.5 minutes AFRICLIM grid cells
Annona senegalensis	-0.270833	12.7292	Terrible tree species distribution map - georeferenced in Google Earth by Tor-Gunnar Vagen (ICRAF)	Terrible PB. Atlas de la Haute-Volta. Arbres et arbustes. Carte de répartition et de présence de 65 espèces. 1975	Georeferenced point locations created by Roeland Kindt (ICRAF) in centre of 2.5 minutes AFRICLIM grid cells
Annona senegalensis	1.60417	12.4792	Terrible tree species distribution map - georeferenced in Google Earth by Tor-Gunnar Vagen (ICRAF)	Terrible PB. Atlas de la Haute-Volta. Arbres et arbustes. Carte de répartition et de présence de 65 espèces. 1975	Georeferenced point locations created by Roeland Kindt (ICRAF) in centre of 2.5 minutes AFRICLIM grid cells
Annona senegalensis	1.60417	12.3958	Terrible tree species distribution map - georeferenced in Google Earth by Tor-Gunnar Vagen (ICRAF)	Terrible PB. Atlas de la Haute-Volta. Arbres et arbustes. Carte de répartition et de présence de 65 espèces. 1975	Georeferenced point locations created by Roeland Kindt (ICRAF) in centre of 2.5 minutes AFRICLIM grid cells
Annona senegalensis	2.02083	12.0625	Terrible tree species distribution map - georeferenced in Google Earth by Tor-Gunnar Vagen (ICRAF)	Terrible PB. Atlas de la Haute-Volta. Arbres et arbustes. Carte de répartition et de présence de 65 espèces. 1975	Georeferenced point locations created by Roeland Kindt (ICRAF) in centre of 2.5 minutes AFRICLIM grid cells
Annona senegalensis	2.02083	11.9792	Terrible tree species distribution map - georeferenced in Google Earth by Tor-Gunnar Vagen (ICRAF)	Terrible PB. Atlas de la Haute-Volta. Arbres et arbustes. Carte de répartition et de présence de 65 espèces. 1975	Georeferenced point locations created by Roeland Kindt (ICRAF) in centre of 2.5 minutes AFRICLIM grid cells
Annona senegalensis	1.77083	11.8125	Terrible tree species distribution map - georeferenced in Google Earth by Tor-Gunnar Vagen (ICRAF)	Terrible PB. Atlas de la Haute-Volta. Arbres et arbustes. Carte de répartition et de présence de 65 espèces. 1975	Georeferenced point locations created by Roeland Kindt (ICRAF) in centre of 2.5 minutes AFRICLIM grid cells
Annona senegalensis	2.02083	11.6875	Terrible tree species distribution map - georeferenced in Google Earth by Tor-Gunnar Vagen (ICRAF)	Terrible PB. Atlas de la Haute-Volta. Arbres et arbustes. Carte de répartition et de présence de 65 espèces. 1975	Georeferenced point locations created by Roeland Kindt (ICRAF) in centre of 2.5 minutes AFRICLIM grid cells
Annona senegalensis	2.1875	11.6458	Terrible tree species distribution map - georeferenced in Google Earth by Tor-Gunnar Vagen (ICRAF)	Terrible PB. Atlas de la Haute-Volta. Arbres et arbustes. Carte de répartition et de présence de 65 espèces. 1975	Georeferenced point locations created by Roeland Kindt (ICRAF) in centre of 2.5 minutes AFRICLIM grid cells
Annona senegalensis	2.10417	11.6458	Terrible tree species distribution map - georeferenced in Google Earth by Tor-Gunnar Vagen (ICRAF)	Terrible PB. Atlas de la Haute-Volta. Arbres et arbustes. Carte de répartition et de présence de 65 espèces. 1975	Georeferenced point locations created by Roeland Kindt (ICRAF) in centre of 2.5 minutes AFRICLIM grid cells
Annona senegalensis	2.02083	11.6042	Terrible tree species distribution map - georeferenced in Google Earth by Tor-Gunnar Vagen (ICRAF)	Terrible PB. Atlas de la Haute-Volta. Arbres et arbustes. Carte de répartition et de présence de 65 espèces. 1975	Georeferenced point locations created by Roeland Kindt (ICRAF) in centre of 2.5 minutes AFRICLIM grid cells
Annona senegalensis	1.39583	11.4792	Terrible tree species distribution map - georeferenced in Google Earth by Tor-Gunnar Vagen (ICRAF)	Terrible PB. Atlas de la Haute-Volta. Arbres et arbustes. Carte de répartition et de présence de 65 espèces. 1975	Georeferenced point locations created by Roeland Kindt (ICRAF) in centre of 2.5 minutes AFRICLIM grid cells
Annona senegalensis	0.854167	11.1875	Terrible tree species distribution map - georeferenced in Google Earth by Tor-Gunnar Vagen (ICRAF)	Terrible PB. Atlas de la Haute-Volta. Arbres et arbustes. Carte de répartition et de présence de 65 espèces. 1975	Georeferenced point locations created by Roeland Kindt (ICRAF) in centre of 2.5 minutes AFRICLIM grid cells
Annona senegalensis	0.0625	11.1875	Terrible tree species distribution map - georeferenced in Google Earth by Tor-Gunnar Vagen (ICRAF)	Terrible PB. Atlas de la Haute-Volta. Arbres et arbustes. Carte de répartition et de présence de 65 espèces. 1975	Georeferenced point locations created by Roeland Kindt (ICRAF) in centre of 2.5 minutes AFRICLIM grid cells
Annona senegalensis	0.104167	11.2708	Terrible tree species distribution map - georeferenced in Google Earth by Tor-Gunnar Vagen (ICRAF)	Terrible PB. Atlas de la Haute-Volta. Arbres et arbustes. Carte de répartition et de présence de 65 espèces. 1975	Georeferenced point locations created by Roeland Kindt (ICRAF) in centre of 2.5 minutes AFRICLIM grid cells
Annona senegalensis	1.27083	11.4792	Terrible tree species distribution map - georeferenced in Google Earth by Tor-Gunnar Vagen (ICRAF)	Terrible PB. Atlas de la Haute-Volta. Arbres et arbustes. Carte de répartition et de présence de 65 espèces. 1975	Georeferenced point locations created by Roeland Kindt (ICRAF) in centre of 2.5 minutes AFRICLIM grid cells
Annona senegalensis	-0.354167	11.7292	Terrible tree species distribution map - georeferenced in Google Earth by Tor-Gunnar Vagen (ICRAF)	Terrible PB. Atlas de la Haute-Volta. Arbres et arbustes. Carte de répartition et de présence de 65 espèces. 1975	Georeferenced point locations created by Roeland Kindt (ICRAF) in centre of 2.5 minutes AFRICLIM grid cells
Annona senegalensis	-0.229167	11.1458	Terrible tree species distribution map - georeferenced in Google Earth by Tor-Gunnar Vagen (ICRAF)	Terrible PB. Atlas de la Haute-Volta. Arbres et arbustes. Carte de répartition et de présence de 65 espèces. 1975	Georeferenced point locations created by Roeland Kindt (ICRAF) in centre of 2.5 minutes AFRICLIM grid cells
Annona senegalensis	-0.729167	11.1042	Terrible tree species distribution map - georeferenced in Google Earth by Tor-Gunnar Vagen (ICRAF)	Terrible PB. Atlas de la Haute-Volta. Arbres et arbustes. Carte de répartition et de présence de 65 espèces. 1975	Georeferenced point locations created by Roeland Kindt (ICRAF) in centre of 2.5 minutes AFRICLIM grid cells
Annona senegalensis	-1.14583	11.1458	Terrible tree species distribution map - georeferenced in Google Earth by Tor-Gunnar Vagen (ICRAF)	Terrible PB. Atlas de la Haute-Volta. Arbres et arbustes. Carte de répartition et de présence de 65 espèces. 1975	Georeferenced point locations created by Roeland Kindt (ICRAF) in centre of 2.5 minutes AFRICLIM grid cells
Annona senegalensis	-1.10417	11.1875	Terrible tree species distribution map - georeferenced in Google Earth by Tor-Gunnar Vagen (ICRAF)	Terrible PB. Atlas de la Haute-Volta. Arbres et arbustes. Carte de répartition et de présence de 65 espèces. 1975	Georeferenced point locations created by Roeland Kindt (ICRAF) in centre of 2.5 minutes AFRICLIM grid cells
Annona senegalensis	-1.1875	11.5208	Terrible tree species distribution map - georeferenced in Google Earth by Tor-Gunnar Vagen (ICRAF)	Terrible PB. Atlas de la Haute-Volta. Arbres et arbustes. Carte de répartition et de présence de 65 espèces. 1975	Georeferenced point locations created by Roeland Kindt (ICRAF) in centre of 2.5 minutes AFRICLIM grid cells
Annona senegalensis	-0.9375	11.5208	Terrible tree species distribution map - georeferenced in Google Earth by Tor-Gunnar Vagen (ICRAF)	Terrible PB. Atlas de la Haute-Volta. Arbres et arbustes. Carte de répartition et de présence de 65 espèces. 1975	Georeferenced point locations created by Roeland Kindt (ICRAF) in centre of 2.5 minutes AFRICLIM grid cells
Annona senegalensis	1.3125	12.4375	Terrible tree species distribution map - georeferenced in Google Earth by Tor-Gunnar Vagen (ICRAF)	Terrible PB. Atlas de la Haute-Volta. Arbres et arbustes. Carte de répartition et de présence de 65 espèces. 1975	Georeferenced point locations created by Roeland Kindt (ICRAF) in centre of 2.5 minutes AFRICLIM grid cells
Annona senegalensis	1.1875	12.3958	Terrible tree species distribution map - georeferenced in Google Earth by Tor-Gunnar Vagen (ICRAF)	Terrible PB. Atlas de la Haute-Volta. Arbres et arbustes. Carte de répartition et de présence de 65 espèces. 1975	Georeferenced point locations created by Roeland Kindt (ICRAF) in centre of 2.5 minutes AFRICLIM grid cells
Annona senegalensis	0.9375	12.1875	Terrible tree species distribution map - georeferenced in Google Earth by Tor-Gunnar Vagen (ICRAF)	Terrible PB. Atlas de la Haute-Volta. Arbres et arbustes. Carte de répartition et de présence de 65 espèces. 1975	Georeferenced point locations created by Roeland Kindt (ICRAF) in centre of 2.5 minutes AFRICLIM grid cells
Annona senegalensis	1.72917	11.9375	Terrible tree species distribution map - georeferenced in Google Earth by Tor-Gunnar Vagen (ICRAF)	Terrible PB. Atlas de la Haute-Volta. Arbres et arbustes. Carte de répartition et de présence de 65 espèces. 1975	Georeferenced point locations created by Roeland Kindt (ICRAF) in centre of 2.5 minutes AFRICLIM grid cells
Annona senegalensis	1.72917	11.8958	Terrible tree species distribution map - georeferenced in Google Earth by Tor-Gunnar Vagen (ICRAF)	Terrible PB. Atlas de la Haute-Volta. Arbres et arbustes. Carte de répartition et de présence de 65 espèces. 1975	Georeferenced point locations created by Roeland Kindt (ICRAF) in centre of 2.5 minutes AFRICLIM grid cells
Annona senegalensis	1.5625	11.6458	Terrible tree species distribution map - georeferenced in Google Earth by Tor-Gunnar Vagen (ICRAF)	Terrible PB. Atlas de la Haute-Volta. Arbres et arbustes. Carte de répartition et de présence de 65 espèces. 1975	Georeferenced point locations created by Roeland Kindt (ICRAF) in centre of 2.5 minutes AFRICLIM grid cells
Annona senegalensis	0.520833	12.0208	Terrible tree species distribution map - georeferenced in Google Earth by Tor-Gunnar Vagen (ICRAF)	Terrible PB. Atlas de la Haute-Volta. Arbres et arbustes. Carte de répartition et de présence de 65 espèces. 1975	Georeferenced point locations created by Roeland Kindt (ICRAF) in centre of 2.5 minutes AFRICLIM grid cells
Annona senegalensis	0.3125	12.1875	Terrible tree species distribution map - georeferenced in Google Earth by Tor-Gunnar Vagen (ICRAF)	Terrible PB. Atlas de la Haute-Volta. Arbres et arbustes. Carte de répartition et de présence de 65 espèces. 1975	Georeferenced point locations created by Roeland Kindt (ICRAF) in centre of 2.5 minutes AFRICLIM grid cells
Annona senegalensis	0.354167	12.3542	Terrible tree species distribution map - georeferenced in Google Earth by Tor-Gunnar Vagen (ICRAF)	Terrible PB. Atlas de la Haute-Volta. Arbres et arbustes. Carte de répartition et de présence de 65 espèces. 1975	Georeferenced point locations created by Roeland Kindt (ICRAF) in centre of 2.5 minutes AFRICLIM grid cells
Annona senegalensis	0.1875	12.1042	Terrible tree species distribution map - georeferenced in Google Earth by Tor-Gunnar Vagen (ICRAF)	Terrible PB. Atlas de la Haute-Volta. Arbres et arbustes. Carte de répartition et de présence de 65 espèces. 1975	Georeferenced point locations created by Roeland Kindt (ICRAF) in centre of 2.5 minutes AFRICLIM grid cells
Annona senegalensis	0.0208333	12.1042	Terrible tree species distribution map - georeferenced in Google Earth by Tor-Gunnar Vagen (ICRAF)	Terrible PB. Atlas de la Haute-Volta. Arbres et arbustes. Carte de répartition et de présence de 65 espèces. 1975	Georeferenced point locations created by Roeland Kindt (ICRAF) in centre of 2.5 minutes AFRICLIM grid cells
Annona senegalensis	-0.145833	12.0208	Terrible tree species distribution map - georeferenced in Google Earth by Tor-Gunnar Vagen (ICRAF)	Terrible PB. Atlas de la Haute-Volta. Arbres et arbustes. Carte de répartition et de présence de 65 espèces. 1975	Georeferenced point locations created by Roeland Kindt (ICRAF) in centre of 2.5 minutes AFRICLIM grid cells
Annona senegalensis	-0.4375	12.6875	Terrible tree species distribution map - georeferenced in Google Earth by Tor-Gunnar Vagen (ICRAF)	Terrible PB. Atlas de la Haute-Volta. Arbres et arbustes. Carte de répartition et de présence de 65 espèces. 1975	Georeferenced point locations created by Roeland Kindt (ICRAF) in centre of 2.5 minutes AFRICLIM grid cells
Annona senegalensis	-0.479167	12.4375	Terrible tree species distribution map - georeferenced in Google Earth by Tor-Gunnar Vagen (ICRAF)	Terrible PB. Atlas de la Haute-Volta. Arbres et arbustes. Carte de répartition et de présence de 65 espèces. 1975	Georeferenced point locations created by Roeland Kindt (ICRAF) in centre of 2.5 minutes AFRICLIM grid cells
Annona senegalensis	-1.22917	11.6458	Terrible tree species distribution map - georeferenced in Google Earth by Tor-Gunnar Vagen (ICRAF)	Terrible PB. Atlas de la Haute-Volta. Arbres et arbustes. Carte de répartition et de présence de 65 espèces. 1975	Georeferenced point locations created by Roeland Kindt (ICRAF) in centre of 2.5 minutes AFRICLIM grid cells
Annona senegalensis	-1.14583	11.7708	Terrible tree species distribution map - georeferenced in Google Earth by Tor-Gunnar Vagen (ICRAF)	Terrible PB. Atlas de la Haute-Volta. Arbres et arbustes. Carte de répartition et de présence de 65 espèces. 1975	Georeferenced point locations created by Roeland Kindt (ICRAF) in centre of 2.5 minutes AFRICLIM grid cells
Annona senegalensis	-1.27083	11.8125	Terrible tree species distribution map - georeferenced in Google Earth by Tor-Gunnar Vagen (ICRAF)	Terrible PB. Atlas de la Haute-Volta. Arbres et arbustes. Carte de répartition et de présence de 65 espèces. 1975	Georeferenced point locations created by Roeland Kindt (ICRAF) in centre of 2.5 minutes AFRICLIM grid cells
Annona senegalensis	-1.3125	11.9375	Terrible tree species distribution map - georeferenced in Google Earth by Tor-Gunnar Vagen (ICRAF)	Terrible PB. Atlas de la Haute-Volta. Arbres et arbustes. Carte de répartition et de présence de 65 espèces. 1975	Georeferenced point locations created by Roeland Kindt (ICRAF) in centre of 2.5 minutes AFRICLIM grid cells
Annona senegalensis	-1.5625	11.9375	Terrible tree species distribution map - georeferenced in Google Earth by Tor-Gunnar Vagen (ICRAF)	Terrible PB. Atlas de la Haute-Volta. Arbres et arbustes. Carte de répartition et de présence de 65 espèces. 1975	Georeferenced point locations created by Roeland Kindt (ICRAF) in centre of 2.5 minutes AFRICLIM grid cells
Annona senegalensis	-1.5625	12.0208	Terrible tree species distribution map - georeferenced in Google Earth by Tor-Gunnar Vagen (ICRAF)	Terrible PB. Atlas de la Haute-Volta. Arbres et arbustes. Carte de répartition et de présence de 65 espèces. 1975	Georeferenced point locations created by Roeland Kindt (ICRAF) in centre of 2.5 minutes AFRICLIM grid cells
Annona senegalensis	-1.10417	12.3542	Terrible tree species distribution map - georeferenced in Google Earth by Tor-Gunnar Vagen (ICRAF)	Terrible PB. Atlas de la Haute-Volta. Arbres et arbustes. Carte de répartition et de présence de 65 espèces. 1975	Georeferenced point locations created by Roeland Kindt (ICRAF) in centre of 2.5 minutes AFRICLIM grid cells
Annona senegalensis	-1.47917	12.3125	Terrible tree species distribution map - georeferenced in Google Earth by Tor-Gunnar Vagen (ICRAF)	Terrible PB. Atlas de la Haute-Volta. Arbres et arbustes. Carte de répartition et de présence de 65 espèces. 1975	Georeferenced point locations created by Roeland Kindt (ICRAF) in centre of 2.5 minutes AFRICLIM grid cells
Annona senegalensis	-1.52083	12.3958	Terrible tree species distribution map - georeferenced in Google Earth by Tor-Gunnar Vagen (ICRAF)	Terrible PB. Atlas de la Haute-Volta. Arbres et arbustes. Carte de répartition et de présence de 65 espèces. 1975	Georeferenced point locations created by Roeland Kindt (ICRAF) in centre of 2.5 minutes AFRICLIM grid cells
Annona senegalensis	-1.60417	11.7292	Terrible tree species distribution map - georeferenced in Google Earth by Tor-Gunnar Vagen (ICRAF)	Terrible PB. Atlas de la Haute-Volta. Arbres et arbustes. Carte de répartition et de présence de 65 espèces. 1975	Georeferenced point locations created by Roeland Kindt (ICRAF) in centre of 2.5 minutes AFRICLIM grid cells
Annona senegalensis	-1.72917	11.5625	Terrible tree species distribution map - georeferenced in Google Earth by Tor-Gunnar Vagen (ICRAF)	Terrible PB. Atlas de la Haute-Volta. Arbres et arbustes. Carte de répartition et de présence de 65 espèces. 1975	Georeferenced point locations created by Roeland Kindt (ICRAF) in centre of 2.5 minutes AFRICLIM grid cells
Annona senegalensis	-2.52083	11.0208	Terrible tree species distribution map - georeferenced in Google Earth by Tor-Gunnar Vagen (ICRAF)	Terrible PB. Atlas de la Haute-Volta. Arbres et arbustes. Carte de répartition et de présence de 65 espèces. 1975	Georeferenced point locations created by Roeland Kindt (ICRAF) in centre of 2.5 minutes AFRICLIM grid cells
Annona senegalensis	-2.64583	11.0208	Terrible tree species distribution map - georeferenced in Google Earth by Tor-Gunnar Vagen (ICRAF)	Terrible PB. Atlas de la Haute-Volta. Arbres et arbustes. Carte de répartition et de présence de 65 espèces. 1975	Georeferenced point locations created by Roeland Kindt (ICRAF) in centre of 2.5 minutes AFRICLIM grid cells
Annona senegalensis	-2.72917	11.0625	Terrible tree species distribution map - georeferenced in Google Earth by Tor-Gunnar Vagen (ICRAF)	Terrible PB. Atlas de la Haute-Volta. Arbres et arbustes. Carte de répartition et de présence de 65 espèces. 1975	Georeferenced point locations created by Roeland Kindt (ICRAF) in centre of 2.5 minutes AFRICLIM grid cells
Annona senegalensis	-2.14583	11.3958	Terrible tree species distribution map - georeferenced in Google Earth by Tor-Gunnar Vagen (ICRAF)	Terrible PB. Atlas de la Haute-Volta. Arbres et arbustes. Carte de répartition et de présence de 65 espèces. 1975	Georeferenced point locations created by Roeland Kindt (ICRAF) in centre of 2.5 minutes AFRICLIM grid cells
Annona senegalensis	-2.1875	11.4792	Terrible tree species distribution map - georeferenced in Google Earth by Tor-Gunnar Vagen (ICRAF)	Terrible PB. Atlas de la Haute-Volta. Arbres et arbustes. Carte de répartition et de présence de 65 espèces. 1975	Georeferenced point locations created by Roeland Kindt (ICRAF) in centre of 2.5 minutes AFRICLIM grid cells
Annona senegalensis	-1.5625	11.8542	Terrible tree species distribution map - georeferenced in Google Earth by Tor-Gunnar Vagen (ICRAF)	Terrible PB. Atlas de la Haute-Volta. Arbres et arbustes. Carte de répartition et de présence de 65 espèces. 1975	Georeferenced point locations created by Roeland Kindt (ICRAF) in centre of 2.5 minutes AFRICLIM grid cells
Annona senegalensis	-2.52083	11.9792	Terrible tree species distribution map - georeferenced in Google Earth by Tor-Gunnar Vagen (ICRAF)	Terrible PB. Atlas de la Haute-Volta. Arbres et arbustes. Carte de répartition et de présence de 65 espèces. 1975	Georeferenced point locations created by Roeland Kindt (ICRAF) in centre of 2.5 minutes AFRICLIM grid cells
Annona senegalensis	-2.27083	12.0208	Terrible tree species distribution map - georeferenced in Google Earth by Tor-Gunnar Vagen (ICRAF)	Terrible PB. Atlas de la Haute-Volta. Arbres et arbustes. Carte de répartition et de présence de 65 espèces. 1975	Georeferenced point locations created by Roeland Kindt (ICRAF) in centre of 2.5 minutes AFRICLIM grid cells
Annona senegalensis	-1.6875	12.4792	Terrible tree species distribution map - georeferenced in Google Earth by Tor-Gunnar Vagen (ICRAF)	Terrible PB. Atlas de la Haute-Volta. Arbres et arbustes. Carte de répartition et de présence de 65 espèces. 1975	Georeferenced point locations created by Roeland Kindt (ICRAF) in centre of 2.5 minutes AFRICLIM grid cells
Annona senegalensis	-1.77083	12.5208	Terrible tree species distribution map - georeferenced in Google Earth by Tor-Gunnar Vagen (ICRAF)	Terrible PB. Atlas de la Haute-Volta. Arbres et arbustes. Carte de répartition et de présence de 65 espèces. 1975	Georeferenced point locations created by Roeland Kindt (ICRAF) in centre of 2.5 minutes AFRICLIM grid cells
Annona senegalensis	-2.60417	12.5208	Terrible tree species distribution map - georeferenced in Google Earth by Tor-Gunnar Vagen (ICRAF)	Terrible PB. Atlas de la Haute-Volta. Arbres et arbustes. Carte de répartition et de présence de 65 espèces. 1975	Georeferenced point locations created by Roeland Kindt (ICRAF) in centre of 2.5 minutes AFRICLIM grid cells
Annona senegalensis	-2.52083	12.1875	Terrible tree species distribution map - georeferenced in Google Earth by Tor-Gunnar Vagen (ICRAF)	Terrible PB. Atlas de la Haute-Volta. Arbres et arbustes. Carte de répartition et de présence de 65 espèces. 1975	Georeferenced point locations created by Roeland Kindt (ICRAF) in centre of 2.5 minutes AFRICLIM grid cells
Annona senegalensis	-2.64583	11.8125	Terrible tree species distribution map - georeferenced in Google Earth by Tor-Gunnar Vagen (ICRAF)	Terrible PB. Atlas de la Haute-Volta. Arbres et arbustes. Carte de répartition et de présence de 65 espèces. 1975	Georeferenced point locations created by Roeland Kindt (ICRAF) in centre of 2.5 minutes AFRICLIM grid cells
Annona senegalensis	-2.77083	11.5625	Terrible tree species distribution map - georeferenced in Google Earth by Tor-Gunnar Vagen (ICRAF)	Terrible PB. Atlas de la Haute-Volta. Arbres et arbustes. Carte de répartition et de présence de 65 espèces. 1975	Georeferenced point locations created by Roeland Kindt (ICRAF) in centre of 2.5 minutes AFRICLIM grid cells
Annona senegalensis	-3.64583	12.5625	Terrible tree species distribution map - georeferenced in Google Earth by Tor-Gunnar Vagen (ICRAF)	Terrible PB. Atlas de la Haute-Volta. Arbres et arbustes. Carte de répartition et de présence de 65 espèces. 1975	Georeferenced point locations created by Roeland Kindt (ICRAF) in centre of 2.5 minutes AFRICLIM grid cells
Annona senegalensis	-3.8125	12.4375	Terrible tree species distribution map - georeferenced in Google Earth by Tor-Gunnar Vagen (ICRAF)	Terrible PB. Atlas de la Haute-Volta. Arbres et arbustes. Carte de répartition et de présence de 65 espèces. 1975	Georeferenced point locations created by Roeland Kindt (ICRAF) in centre of 2.5 minutes AFRICLIM grid cells
Annona senegalensis	-4.3125	12.3542	Terrible tree species distribution map - georeferenced in Google Earth by Tor-Gunnar Vagen (ICRAF)	Terrible PB. Atlas de la Haute-Volta. Arbres et arbustes. Carte de répartition et de présence de 65 espèces. 1975	Georeferenced point locations created by Roeland Kindt (ICRAF) in centre of 2.5 minutes AFRICLIM grid cells
Annona senegalensis	-4.1875	12.3542	Terrible tree species distribution map - georeferenced in Google Earth by Tor-Gunnar Vagen (ICRAF)	Terrible PB. Atlas de la Haute-Volta. Arbres et arbustes. Carte de répartition et de présence de 65 espèces. 1975	Georeferenced point locations created by Roeland Kindt (ICRAF) in centre of 2.5 minutes AFRICLIM grid cells
Annona senegalensis	-4.10417	12.2708	Terrible tree species distribution map - georeferenced in Google Earth by Tor-Gunnar Vagen (ICRAF)	Terrible PB. Atlas de la Haute-Volta. Arbres et arbustes. Carte de répartition et de présence de 65 espèces. 1975	Georeferenced point locations created by Roeland Kindt (ICRAF) in centre of 2.5 minutes AFRICLIM grid cells
Annona senegalensis	-4.5625	11.9792	Terrible tree species distribution map - georeferenced in Google Earth by Tor-Gunnar Vagen (ICRAF)	Terrible PB. Atlas de la Haute-Volta. Arbres et arbustes. Carte de répartition et de présence de 65 espèces. 1975	Georeferenced point locations created by Roeland Kindt (ICRAF) in centre of 2.5 minutes AFRICLIM grid cells
Annona senegalensis	-5.0625	11.8958	Terrible tree species distribution map - georeferenced in Google Earth by Tor-Gunnar Vagen (ICRAF)	Terrible PB. Atlas de la Haute-Volta. Arbres et arbustes. Carte de répartition et de présence de 65 espèces. 1975	Georeferenced point locations created by Roeland Kindt (ICRAF) in centre of 2.5 minutes AFRICLIM grid cells
Annona senegalensis	-4.89583	11.8125	Terrible tree species distribution map - georeferenced in Google Earth by Tor-Gunnar Vagen (ICRAF)	Terrible PB. Atlas de la Haute-Volta. Arbres et arbustes. Carte de répartition et de présence de 65 espèces. 1975	Georeferenced point locations created by Roeland Kindt (ICRAF) in centre of 2.5 minutes AFRICLIM grid cells
Annona senegalensis	-4.8125	11.7292	Terrible tree species distribution map - georeferenced in Google Earth by Tor-Gunnar Vagen (ICRAF)	Terrible PB. Atlas de la Haute-Volta. Arbres et arbustes. Carte de répartition et de présence de 65 espèces. 1975	Georeferenced point locations created by Roeland Kindt (ICRAF) in centre of 2.5 minutes AFRICLIM grid cells
Annona senegalensis	-4.9375	11.1458	Terrible tree species distribution map - georeferenced in Google Earth by Tor-Gunnar Vagen (ICRAF)	Terrible PB. Atlas de la Haute-Volta. Arbres et arbustes. Carte de répartition et de présence de 65 espèces. 1975	Georeferenced point locations created by Roeland Kindt (ICRAF) in centre of 2.5 minutes AFRICLIM grid cells
Annona senegalensis	-4.9375	11.1042	Terrible tree species distribution map - georeferenced in Google Earth by Tor-Gunnar Vagen (ICRAF)	Terrible PB. Atlas de la Haute-Volta. Arbres et arbustes. Carte de répartition et de présence de 65 espèces. 1975	Georeferenced point locations created by Roeland Kindt (ICRAF) in centre of 2.5 minutes AFRICLIM grid cells
Annona senegalensis	-5.27083	11.0625	Terrible tree species distribution map - georeferenced in Google Earth by Tor-Gunnar Vagen (ICRAF)	Terrible PB. Atlas de la Haute-Volta. Arbres et arbustes. Carte de répartition et de présence de 65 espèces. 1975	Georeferenced point locations created by Roeland Kindt (ICRAF) in centre of 2.5 minutes AFRICLIM grid cells
Annona senegalensis	-5.0625	11.0208	Terrible tree species distribution map - georeferenced in Google Earth by Tor-Gunnar Vagen (ICRAF)	Terrible PB. Atlas de la Haute-Volta. Arbres et arbustes. Carte de répartition et de présence de 65 espèces. 1975	Georeferenced point locations created by Roeland Kindt (ICRAF) in centre of 2.5 minutes AFRICLIM grid cells
Annona senegalensis	-4.9375	11.0625	Terrible tree species distribution map - georeferenced in Google Earth by Tor-Gunnar Vagen (ICRAF)	Terrible PB. Atlas de la Haute-Volta. Arbres et arbustes. Carte de répartition et de présence de 65 espèces. 1975	Georeferenced point locations created by Roeland Kindt (ICRAF) in centre of 2.5 minutes AFRICLIM grid cells
Annona senegalensis	-5.14583	10.6458	Terrible tree species distribution map - georeferenced in Google Earth by Tor-Gunnar Vagen (ICRAF)	Terrible PB. Atlas de la Haute-Volta. Arbres et arbustes. Carte de répartition et de présence de 65 espèces. 1975	Georeferenced point locations created by Roeland Kindt (ICRAF) in centre of 2.5 minutes AFRICLIM grid cells
Annona senegalensis	-5.0625	10.5208	Terrible tree species distribution map - georeferenced in Google Earth by Tor-Gunnar Vagen (ICRAF)	Terrible PB. Atlas de la Haute-Volta. Arbres et arbustes. Carte de répartition et de présence de 65 espèces. 1975	Georeferenced point locations created by Roeland Kindt (ICRAF) in centre of 2.5 minutes AFRICLIM grid cells
Annona senegalensis	-5.0625	10.6042	Terrible tree species distribution map - georeferenced in Google Earth by Tor-Gunnar Vagen (ICRAF)	Terrible PB. Atlas de la Haute-Volta. Arbres et arbustes. Carte de répartition et de présence de 65 espèces. 1975	Georeferenced point locations created by Roeland Kindt (ICRAF) in centre of 2.5 minutes AFRICLIM grid cells
Annona senegalensis	-4.97917	10.4375	Terrible tree species distribution map - georeferenced in Google Earth by Tor-Gunnar Vagen (ICRAF)	Terrible PB. Atlas de la Haute-Volta. Arbres et arbustes. Carte de répartition et de présence de 65 espèces. 1975	Georeferenced point locations created by Roeland Kindt (ICRAF) in centre of 2.5 minutes AFRICLIM grid cells
Annona senegalensis	-4.89583	10.2708	Terrible tree species distribution map - georeferenced in Google Earth by Tor-Gunnar Vagen (ICRAF)	Terrible PB. Atlas de la Haute-Volta. Arbres et arbustes. Carte de répartition et de présence de 65 espèces. 1975	Georeferenced point locations created by Roeland Kindt (ICRAF) in centre of 2.5 minutes AFRICLIM grid cells
Annona senegalensis	-4.77083	10.3958	Terrible tree species distribution map - georeferenced in Google Earth by Tor-Gunnar Vagen (ICRAF)	Terrible PB. Atlas de la Haute-Volta. Arbres et arbustes. Carte de répartition et de présence de 65 espèces. 1975	Georeferenced point locations created by Roeland Kindt (ICRAF) in centre of 2.5 minutes AFRICLIM grid cells
Annona senegalensis	-4.35417	10.6875	Terrible tree species distribution map - georeferenced in Google Earth by Tor-Gunnar Vagen (ICRAF)	Terrible PB. Atlas de la Haute-Volta. Arbres et arbustes. Carte de répartition et de présence de 65 espèces. 1975	Georeferenced point locations created by Roeland Kindt (ICRAF) in centre of 2.5 minutes AFRICLIM grid cells
Annona senegalensis	-4.77083	10.5625	Terrible tree species distribution map - georeferenced in Google Earth by Tor-Gunnar Vagen (ICRAF)	Terrible PB. Atlas de la Haute-Volta. Arbres et arbustes. Carte de répartition et de présence de 65 espèces. 1975	Georeferenced point locations created by Roeland Kindt (ICRAF) in centre of 2.5 minutes AFRICLIM grid cells
Annona senegalensis	-4.64583	10.6458	Terrible tree species distribution map - georeferenced in Google Earth by Tor-Gunnar Vagen (ICRAF)	Terrible PB. Atlas de la Haute-Volta. Arbres et arbustes. Carte de répartition et de présence de 65 espèces. 1975	Georeferenced point locations created by Roeland Kindt (ICRAF) in centre of 2.5 minutes AFRICLIM grid cells
Annona senegalensis	-4.89583	10.6458	Terrible tree species distribution map - georeferenced in Google Earth by Tor-Gunnar Vagen (ICRAF)	Terrible PB. Atlas de la Haute-Volta. Arbres et arbustes. Carte de répartition et de présence de 65 espèces. 1975	Georeferenced point locations created by Roeland Kindt (ICRAF) in centre of 2.5 minutes AFRICLIM grid cells
Annona senegalensis	-4.6875	10.7708	Terrible tree species distribution map - georeferenced in Google Earth by Tor-Gunnar Vagen (ICRAF)	Terrible PB. Atlas de la Haute-Volta. Arbres et arbustes. Carte de répartition et de présence de 65 espèces. 1975	Georeferenced point locations created by Roeland Kindt (ICRAF) in centre of 2.5 minutes AFRICLIM grid cells
Annona senegalensis	-3.89583	12.2292	Terrible tree species distribution map - georeferenced in Google Earth by Tor-Gunnar Vagen (ICRAF)	Terrible PB. Atlas de la Haute-Volta. Arbres et arbustes. Carte de répartition et de présence de 65 espèces. 1975	Georeferenced point locations created by Roeland Kindt (ICRAF) in centre of 2.5 minutes AFRICLIM grid cells
Annona senegalensis	-4.14583	12.1042	Terrible tree species distribution map - georeferenced in Google Earth by Tor-Gunnar Vagen (ICRAF)	Terrible PB. Atlas de la Haute-Volta. Arbres et arbustes. Carte de répartition et de présence de 65 espèces. 1975	Georeferenced point locations created by Roeland Kindt (ICRAF) in centre of 2.5 minutes AFRICLIM grid cells
Annona senegalensis	-4.22917	12.0625	Terrible tree species distribution map - georeferenced in Google Earth by Tor-Gunnar Vagen (ICRAF)	Terrible PB. Atlas de la Haute-Volta. Arbres et arbustes. Carte de répartition et de présence de 65 espèces. 1975	Georeferenced point locations created by Roeland Kindt (ICRAF) in centre of 2.5 minutes AFRICLIM grid cells
Annona senegalensis	-4.47917	11.7292	Terrible tree species distribution map - georeferenced in Google Earth by Tor-Gunnar Vagen (ICRAF)	Terrible PB. Atlas de la Haute-Volta. Arbres et arbustes. Carte de répartition et de présence de 65 espèces. 1975	Georeferenced point locations created by Roeland Kindt (ICRAF) in centre of 2.5 minutes AFRICLIM grid cells
Annona senegalensis	-4.60417	11.6042	Terrible tree species distribution map - georeferenced in Google Earth by Tor-Gunnar Vagen (ICRAF)	Terrible PB. Atlas de la Haute-Volta. Arbres et arbustes. Carte de répartition et de présence de 65 espèces. 1975	Georeferenced point locations created by Roeland Kindt (ICRAF) in centre of 2.5 minutes AFRICLIM grid cells
Annona senegalensis	-4.35417	11.1875	Terrible tree species distribution map - georeferenced in Google Earth by Tor-Gunnar Vagen (ICRAF)	Terrible PB. Atlas de la Haute-Volta. Arbres et arbustes. Carte de répartition et de présence de 65 espèces. 1975	Georeferenced point locations created by Roeland Kindt (ICRAF) in centre of 2.5 minutes AFRICLIM grid cells
Annona senegalensis	-4.89583	10.9792	Terrible tree species distribution map - georeferenced in Google Earth by Tor-Gunnar Vagen (ICRAF)	Terrible PB. Atlas de la Haute-Volta. Arbres et arbustes. Carte de répartition et de présence de 65 espèces. 1975	Georeferenced point locations created by Roeland Kindt (ICRAF) in centre of 2.5 minutes AFRICLIM grid cells
[truncated: 4,339 more rows]
